# Supplementary material for: Experimental verification of halomethyl carbinol synthesis from carbonyl compounds using a TiCl4–Mg bimetallic complex promoter
Source: Royal Society of Chemistry journal article supplement (doi:10.1039/d4ra07250b), 2024-01-01
Supplement: d4ra07250b1.pdf [file d4ra07250b1.pdf]

## Supporting Information

# Experimental verification of halomethyl carbinols synthesis from carbonyl compounds using a $\text{TiCl}_4$ -Mg bimetallic complex promoter

Olga Michalak, <sup>\*,a</sup> Sylwia Żurawicka, <sup>a</sup> Marek Kubiszewski, <sup>b</sup> Piotr Krzeczynski, <sup>a</sup> Andrzej Leś, <sup>c</sup> Sławomir Filipek, <sup>d</sup> Marcin Cybulski <sup>a</sup>

<sup>a</sup>Pharmacy, Cosmetic Chemistry and Biotechnology Research Group, Lukaszewicz Research Network-Industrial Chemistry Institute, Rydygiera 8, 01-793 Warsaw, Poland.

<sup>b</sup>Pharmaceutical Analysis Laboratory, Lukaszewicz Research Network-Industrial Chemistry Institute, Rydygiera 8, 01-793 Warsaw, Poland.

<sup>c</sup>Faculty of Chemistry, University of Warsaw, Pasteura 1, 02-093 Warsaw, Poland.

<sup>d</sup>Biological and Chemical Research Centre, Faculty of Chemistry, University of Warsaw, Pasteura 1, 02-093 Warsaw, Poland.

\* Correspondence: Lukaszewicz Research Network-Industrial Chemistry Institute, Rydygiera 8, 01-793 Warsaw, Poland; o.michalak@ichp.lukasiewicz.gov.pl; Tel. +48 453 056 175

### Table of Content

- [S.1] Modeling of the Mg powder and reagents
- [S.2] Reaction of Mg powder with  $\text{CH}_2\text{Br}_2$
- [S.3] Reaction of Mg powder with  $\text{Mg}::\text{CH}_2\text{Br}_2$  complex and  $\text{TiCl}_4$
- [S.4] A model of the reaction of the solvent molecules with the Ti/Mg catalyst.
- [S.4.A] Inclusion of DBE to the  $\text{TiCl}_3::\text{MgCH}_2\text{Br}_2$  bimetallic catalyst
- [S.4.B] Inclusion of DEE to the  $\text{TiCl}_3::\text{MgBr}_2$  bimetallic catalyst
- [S.4.C] Inclusion of 2,5-dihydrofuran to the  $\text{TiCl}_3::\text{MgCH}_2\text{Br}_2$  bimetallic catalyst
- [S.5] A model of 1,2-dichloroethane reaction with the magnesium powder
- [S.6] A model of the reaction of benzaldehyde with Ti/Mg catalyst
- [S.7] Hydrobenzoin formation promoted by the Ti/Mg catalyst
- [S.8] A possible formation of 1-bromomethyl)benzyl alcohol
- [S.9] A cumulative stoichiometric reaction of hydrobenzoin formation
- [S.10] The solvent effect on the output of the reaction (E.5) in the main text
- [S.11] NMR spectra
- [S.12] HRMS spectra

### [S.1] Modeling of the Mg powder and reagents

The chemical reaction occurring in the course of synthesis can be analysed with the stoichiometric equations and the Gibbs free energies ( $\Delta G$ ), enthalpies ( $\Delta H$ ) and the sum of electronic and nuclear energies ( $\Delta E$ ) estimated with the quantum mechanical calculations.

A theoretical model of the Mg powder becomes a challenge from the quantum mechanical point of view. The metallic Mg powder is composed of small metallic particles which should have an internal molecular structure close to the Mg crystals with irregular structure at the particle surface. In a more advanced modeling one should consider clusters of the Mg atoms, e.g.  $\text{Mg}_n$ ,  $n \gg 1$ .

At first approximation, one can represent the Mg powder by a single Mg atom in the singlet ground state.

The reagents (including solvents) can be represented by the corresponding chemical molecules.

### [S.2] Reaction of Mg powder with $\text{CH}_2\text{Br}_2$

One can suggest the following reaction (SE.1):

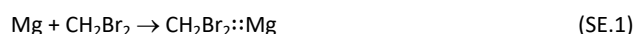

$$\Delta G = -51.6 \text{ kcal/mol}$$

$$\Delta H = -58.0 \text{ kcal/mol}$$

$$\Delta E = -57.4 \text{ kcal/mol}$$

From these calculations, one can predict that the reaction of Mg (powder) with dibromomethane is spontaneous and exothermic. It is expected that this reaction will require intensive cooling.

The reaction product, i.e.  $\text{CH}_2\text{Br}_2::\text{Mg}$  magnesium complex can be viewed as a Br analogue of the Grignard reagent of a general formula  $\text{alkyl-Mg-Br}$ .

An interesting molecular structure of the  $\text{CH}_2\text{Br}_2::\text{Mg}$  product was obtained theoretically. The Mg atom is bound to Br and the bromomethylene unit, as shown in Figure S1.

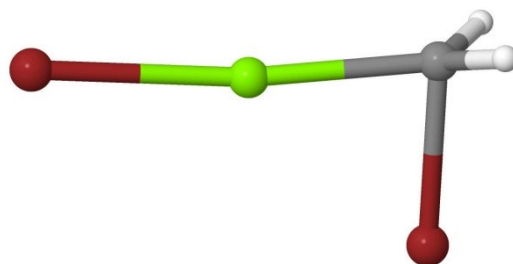

**Figure S1.** The optimized molecular structure of the  $\text{MgCH}_2\text{Br}_2$  magnesium complex. Colour codes: dark red: Br; green: Mg; grey: C; white: H.

### [S.3] Reaction of Mg powder with Mg::CH<sub>2</sub>Br<sub>2</sub> complex and TiCl<sub>4</sub>

The suggested stoichiometric reaction (SE.3) corresponds to the formation of the Ti/Mg bimetallic catalyst:

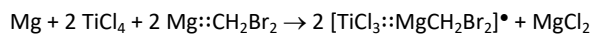

$$\Delta G = -68.9 \text{ kcal/mol} \quad (\text{SE.3})$$

$$\Delta H = -86.2 \text{ kcal/mol}$$

$$\Delta E = -87.5 \text{ kcal/mol}$$

An interesting feature of the [TiCl<sub>3</sub>::MgCH<sub>2</sub>Br<sub>2</sub>]<sup>•</sup> complex is a split of the MgCH<sub>2</sub>Br<sub>2</sub> unit into [MgBr]<sup>•</sup> and [CH<sub>2</sub>Br]<sup>•</sup> radicals. The [CH<sub>2</sub>Br]<sup>•</sup> unit is coordinated to the Ti cation. The Mg atom of [MgBr]<sup>•</sup> unit is bound simultaneously to two chlorine atoms of TiCl<sub>3</sub>. The optimized molecular geometry of the titanium/magnesium complex in the form of the [TiCl<sub>3</sub>::MgCH<sub>2</sub>Br<sub>2</sub>]<sup>•</sup> radical is presented in Figure S2.

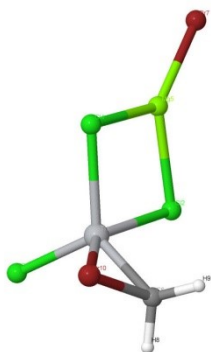

**Figure S2.** The optimized molecular structure of the TiCl<sub>3</sub>MgCH<sub>2</sub>Br<sub>2</sub> magnesium complex. Color codes: light grey: Ti; dark red: Br; green: Cl; light green: Mg; dark grey: C; white: H.

### [S.4] A model of reactions of the solvent molecules with the Ti/Mg catalyst

#### [S.4.A] Inclusion of DBE in the TiCl<sub>3</sub>::MgBr<sub>2</sub> bimetallic catalyst

(DBE means the dibutylether)

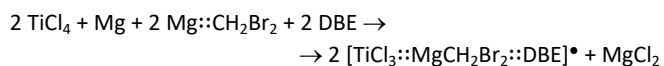

$$\Delta G = -60.4 \text{ kcal/mol} \quad (\text{SE.4})$$

$$\Delta H = -101.8 \text{ kcal/mol}$$

$$\Delta E = -106.9 \text{ kcal/mol}$$

It is clear that the above reactions should be spontaneous and exothermic.

A hypothetical [TiCl<sub>3</sub>:MgCH<sub>2</sub>Br<sub>2</sub>::DBE]<sup>•</sup> complex may have the molecular structure presented in the Figure S4:

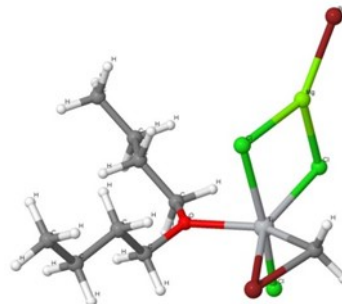

**Figure S3.** The optimized geometry of the TiCl<sub>3</sub>::MgCH<sub>2</sub>Br<sub>2</sub>::DBE complex. Color codes: light gray: Ti; green: Cl; dark red: Br; light green: Mg; red: O; dark gray: C; white: H. The atoms O–Ti–C, Cl(up) and Cl(down), Br–Ti–Cl belong to one plane (approximately). Also, Ti–Cl–Cl–Cl belong to another plane (perpendicular to the former plane). The Mg atom is coordinated by two Cl atoms and one Br atom. The oxygen atom from DBE occupies one coordination site of Ti.

The Ti-containing radical is reactive species and likely it should attack aldehyde/ketone present in the reaction soup.

#### [S.4.B] Inclusion of DEE to the TiCl<sub>3</sub>::MgBr<sub>2</sub> bimetallic catalyst

An interesting though rather hypothetical formation of a Ti/Mg bimetallic complex with the bidentate ligand 1,2-dimethoxyethane (DEE), as the result of interactions of with dimethoxyethane reagent (DME), was presented below in the Figure S4.

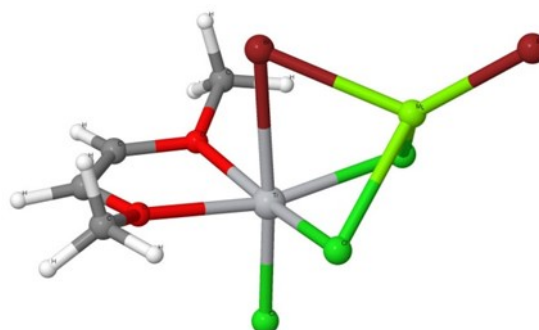

**Figure S4.** The octahedral molecular geometry of the DEETiCl<sub>3</sub>MgBr<sub>2</sub>LB complex of TiCl<sub>3</sub>::MgBr<sub>2</sub>::2,5-dimethoxyethane. Colour codes: light gray: Ti; green: Cl; dark red: Br; light green: Mg; red: O; dark gray: C; white: H. The atoms O–Ti–Br, Cl(up) and

Cl(down) belong to one plane (approximately). Also Ti–Cl–Cl–Cl belong to another plane (perpendicular to the former plane). The Mg atom is coordinated to two Cl atoms, and two Br atoms.

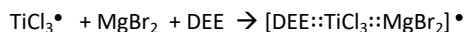

A energy output suggests rather strong ligand binding to the  $\text{TiCl}_3$  core:

$$\begin{aligned} \Delta G &= -32.8 \text{ kcal/mol} \\ \Delta H &= -55.5 \text{ kcal/mol} \\ \Delta E &= -58.5 \text{ kcal/mol} \end{aligned}$$

#### [S.4.C] Inclusion of 2,5-dihydrofuran to the $\text{TiCl}_3::\text{MgCH}_2\text{Br}_2$ bimetallic catalyst

Below is an analogical model reaction of furan (THF) in place of DME. A possible stoichiometric reaction including  $\text{TiCl}_4$  (original, not reduced to  $\text{TiCl}_3$ ),  $\text{MgCH}_2\text{Br}_2$  and furan can read as follows:

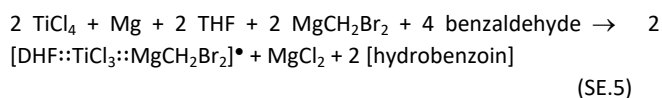

$$\begin{aligned} \Delta G &= -6.1 \text{ kcal/mol} \\ \Delta H &= -71.3 \text{ kcal/mol} \\ \Delta E &= -80.2 \text{ kcal/mol} \end{aligned}$$

The product (  $[\text{2,5-DHF}::\text{TiCl}_3::\text{MgCH}_2\text{Br}_2]^\bullet$  ) is presented in the Figure S5.

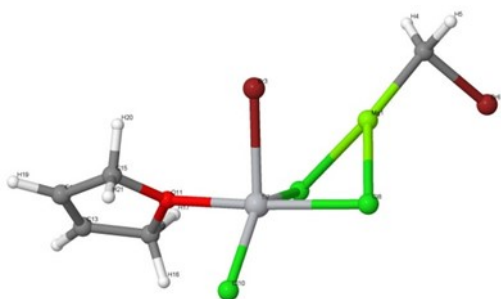

**Figure S5.** The molecular structure of the  $[\text{2,5-DHF}::\text{TiCl}_3::\text{MgCH}_2\text{Br}_2]^\bullet$ . Colour codes: light gray: Ti; green; Cl; dark red: Br; light green: Mg; red: O; dark gray: C; white: H.

#### [S.5] A model of 1,2-dichloroethane reaction with magnesium powder

The addition of 1,2-dichloroethane ( $\text{Cl-CH}_2\text{-CH}_2\text{-Cl}$ , DCE) to the reaction mixture causes production of heat. It is reasonable to assume that the heat is a result of the reaction of the Mg powder with DCE. The following stoichiometric reactions were designed (SE.6):

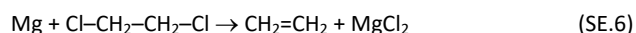

$$\begin{aligned} \Delta G &= -86.9 \text{ kcal/mol} \\ \Delta H &= -85.1 \text{ kcal/mol} \\ \Delta E &= -82.7 \text{ kcal/mol} \end{aligned}$$

The Mg powder can be better represented with the  $\text{Mg}_7$  cluster powder (simulated by a single Mg atom or the  $\text{Mg}_7$  cluster). The corresponding reaction with DCE is shown as the R.8 reaction in the main part:

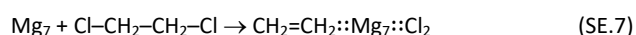

$$\begin{aligned} \Delta G &= -74.2 \text{ kcal/mol} \\ \Delta H &= -94.1 \text{ kcal/mol} \\ \Delta E &= -84.2 \text{ kcal/mol} \end{aligned}$$

It is predicted that the Mg powder should react efficiently with DCE spontaneously and exothermic. It is likely that the  $\Delta G$  estimation for the Reaction R.8 can be even more negative because in the calculations, the geometry of the  $\text{Mg}_7$  cluster was kept fixed (not optimized), see Figure S6.

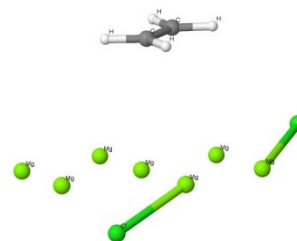

**Figure S6.** The molecular structure of the  $\text{CH}_2=\text{CH}_2::\text{Mg}_7::\text{Cl}_2$  complex supposed to be the result of the reaction of the  $\text{Mg}_7$  cluster with the 1,2-dichloroethane. The geometry of the  $\text{Mg}_7$  cluster was assumed to be fixed. Color codes: light green: Mg; dark green : Cl, grey: C, white: H.

An interesting feature of the R.7 and R.8 reaction products is the C–Cl bond split in 1,2-dichloroethane and formation of the  $[\text{MgCl}]^\bullet$  radicals. Either reaction products, i.e. ethylene and the  $[\text{MgCl}]^\bullet$  radicals are highly reactive species that can influence other reactions occurring in the reaction soup.

#### [S.6] A model of the reaction of benzaldehyde with Ti/Mg catalyst

Due to a large size of the molecular complexes, we select here the  $[\text{TiCl}_3]^\bullet$  radical as the active form of the  $[\text{TiCl}_3::\text{MgCH}_2\text{Br}_2]^\bullet$  catalyst. A first step of the reaction is the formation of an intermediate molecular structure composed from one benzaldehyde molecule and one  $\text{TiCl}_3$  unit as it is shown in the reaction SE.8:

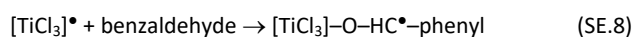

$$\begin{aligned} \Delta G &= -18.5 \text{ kcal/mol} \\ \Delta H &= -28.4 \text{ kcal/mol} \\ \Delta E &= -29.3 \text{ kcal/mol} \end{aligned}$$

The molecular geometry of the reaction's product is shown in Figure S7.

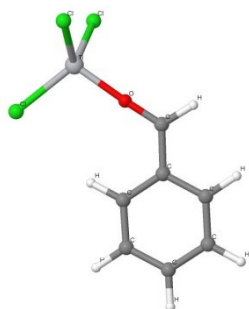

**Figure S7.** The molecular structure of the  $[\text{TiCl}_3]\text{-O-}\dot{\text{C}}\text{-phenyl}$  complex. Color codes: light gray: Ti; dark green : Cl, grey: C, white: H.

Next, two  $[\text{TiCl}_3]\text{-O-}\dot{\text{C}}\text{-phenyl}$  complexes couple together via the carbon-carbon bond as it is shown in the reaction (SE9):

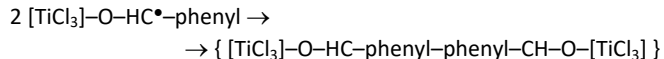

$$\begin{aligned} \Delta G &= -15.2 \text{ kcal/mol} \\ \Delta H &= -30.9 \text{ kcal/mol} \\ \Delta E &= -34.4 \text{ kcal/mol} \end{aligned} \quad (\text{SE.9})$$

The product of the SE.9 reaction can be viewed as a precursor of hydrobenzoin. In the present modeling the  $\text{TiCl}_3$  units are bound to the oxygen atoms while the carbon-carbon bond links the neighboring benzaldehyde residues, see Figure S8.

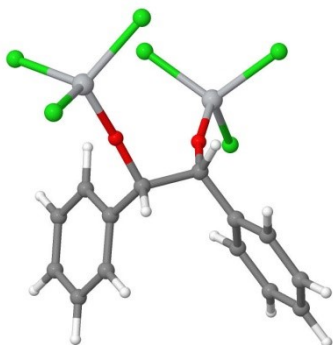

**Figure S8.** The molecular geometry of the  $\{[\text{TiCl}_3]\text{-O-}\text{HC-phenyl-phenyl-CH-O-}[\text{TiCl}_3]\}$  titanium-benzaldehyde (pinacol-like) hydrobenzoin complex. Titanium atoms are shown in light-grey, oxygen atoms in red.

### [S.7] Hydrobenzoin formation promoted by the Ti/Mg catalyst

A subsequent formation of hydrobenzoin in water can be represented by the following stoichiometric reaction (SE.10):

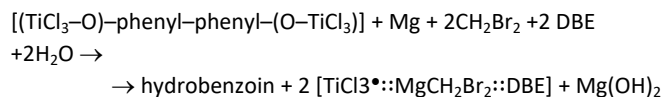

$$\begin{aligned} \Delta G &= -19.6 \text{ kcal/mol} \\ \Delta H &= -59.8 \text{ kcal/mol} \\ \Delta E &= -64.8 \text{ kcal/mol} \end{aligned} \quad (\text{SE.10})$$

The molecular geometry of hydrobenzoin is given in Figure S9:

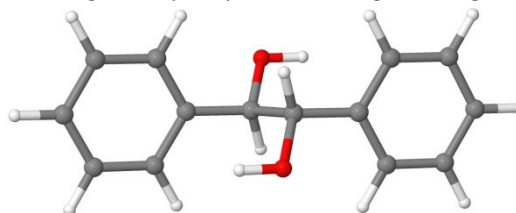

**Figure S9.** The molecular geometry of the hydrobenzoin. Titanium atoms are shown in light-grey, oxygen atoms in red.

The  $[\text{TiCl}_3^*::\text{MgCH}_2\text{Br}_2::\text{DHF}]$  complex is shown on Figure S5:

A more efficient reaction can occur when the  $\text{KHCO}_3$  aqueous solution is used:

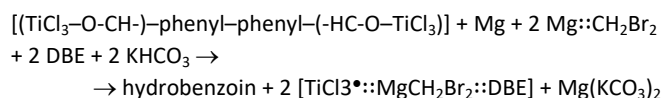

(SE.11)

$$\begin{aligned} \Delta G &= -59.3 \text{ kcal/mol} \\ \Delta H &= -103.8 \text{ kcal/mol} \\ \Delta E &= -108.5 \text{ kcal/mol} \end{aligned}$$

An additional energy gain is expected when two  $[\text{TiCl}_3^*::\text{MgCH}_2\text{Br}_2::\text{DBE}]$  radicals will form a dimeric complex.

The molecular geometry of  $\text{K}_2\text{Mg(CO}_3)_2$  is given in Figure S10:

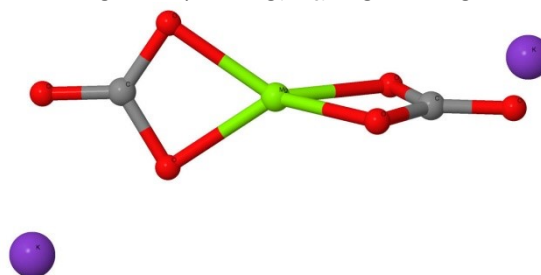

**Figure S10.** The molecular geometry of the  $K_2Mg(CO_3)_2$ . Potassium atoms are shown in violet, oxygen atoms in red, magnesium in light-green and carbon in dark gray: C.

### [S.8] A possible formation of 1-bromomethyl)benzyl alcohol

A possible formation of (1-bromomethyl)benzylalcohol will likely not occur (SE.13):

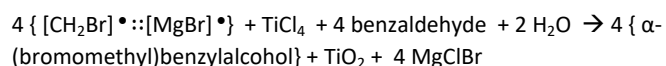

$$\begin{aligned} \Delta G &= -6.8 \text{ kcal/mol} \\ \Delta H &= -44.5 \text{ kcal/mol} \\ \Delta E &= -56.7 \text{ kcal/mol} \end{aligned} \quad (\text{SE.13})$$

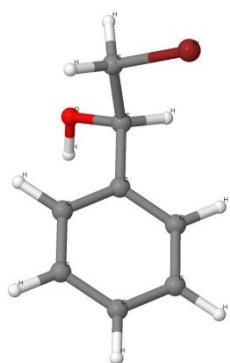

**Figure S11.** The optimized molecular geometry of (1-bromomethyl)benzyl alcohol. Color codes: Bromine atom is shown in dark red, the oxygen atom in red, carbon atoms are in dark grey and hydrogen atoms are in light grey.

### [S.9] A cumulative stoichiometric reaction of hydrobenzoin formation

Reaction with water :

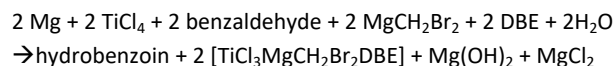

(SE.14)

$$\begin{aligned} \Delta G &= -87.6 \text{ kcal/mol} \\ \Delta H &= -157.4 \text{ kcal/mol} \\ \Delta E &= -166.6 \text{ kcal/mol} \end{aligned}$$

Reaction with  $KHCO_3$ :

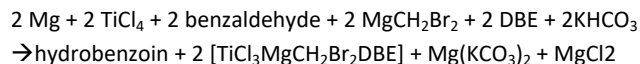

(SE. 15)

$$\begin{aligned} \Delta G &= -127.3 \text{ kcal/mol} \\ \Delta H &= -201.4 \text{ kcal/mol} \\ \Delta E &= -210.3 \text{ kcal/mol} \end{aligned}$$

### [S.10] The solvent effect on the output of the reaction (E.5) in the main text

Four solvents were considered, i.e. DBE, THF, 2,5-dihydrofuran, and DEE.

The output of the reaction (E.5, manuscript) is presented in the table below, in kcal/mol.

| Quantity   | DBE    | THF    | 2,5-dihydrofuran | DEE <sup>1)</sup> |
|------------|--------|--------|------------------|-------------------|
| $\Delta G$ | -59.3  | -59.9  | -59.6            | -80.4             |
| $\Delta H$ | -103.8 | -102.1 | -102.1           | -123.0            |
| $\Delta E$ | -108.4 | -106.4 | -106.4           | -127.4            |

Footnote <sup>1)</sup> : In the reaction (E.5, manuscript) the  $MgCH_2Br_2$  was used.

In the reaction with DEE we used the  $MgBr_2$ .

### [S.11] NMR spectra

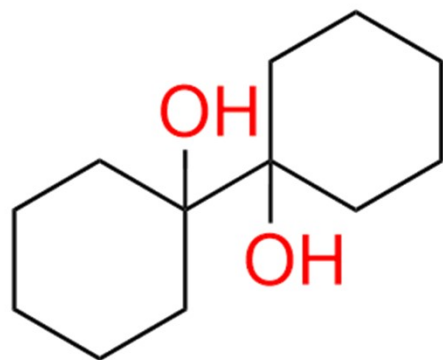

**1a**

<sup>1</sup>H NMR (500 MHz, CDCl<sub>3</sub>)

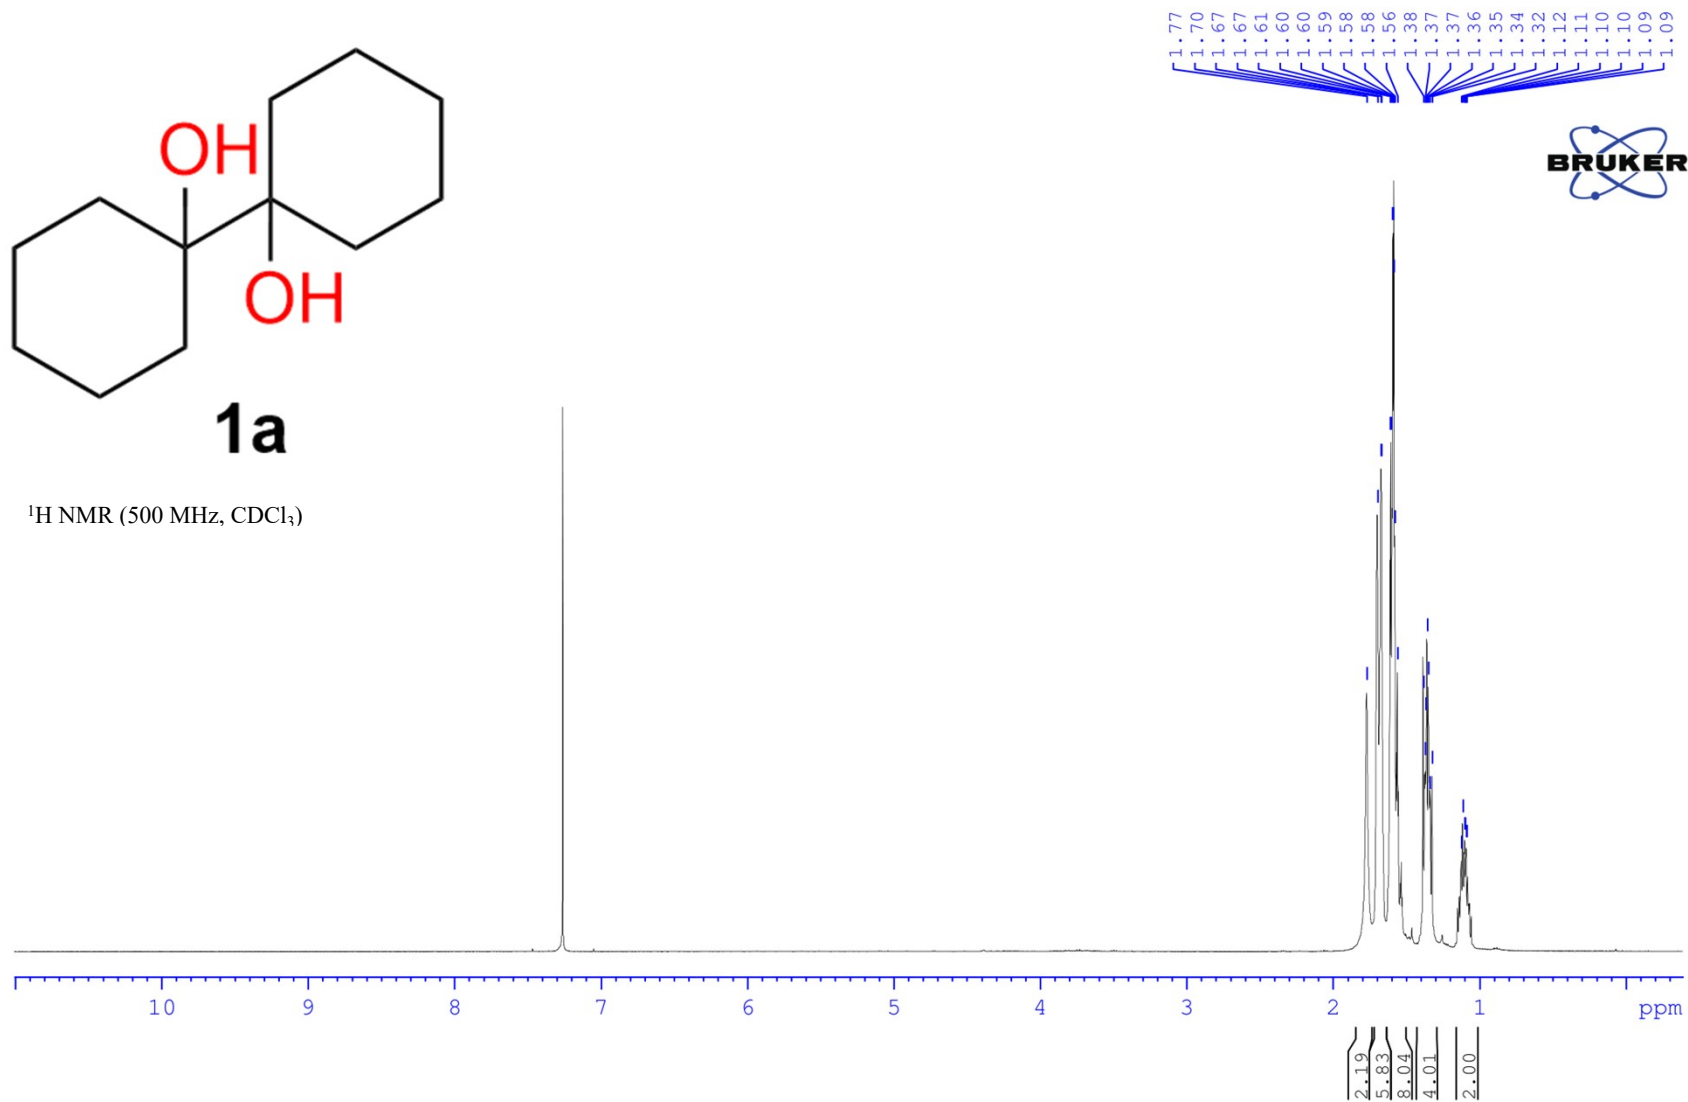

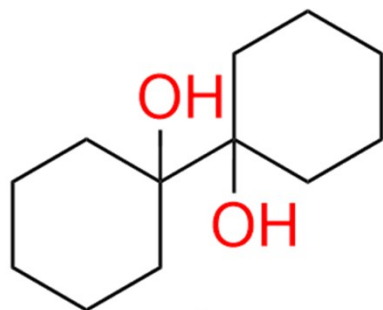

**1a**

$^{13}\text{C}$  NMR (125 MHz,  $\text{CDCl}_3$ )

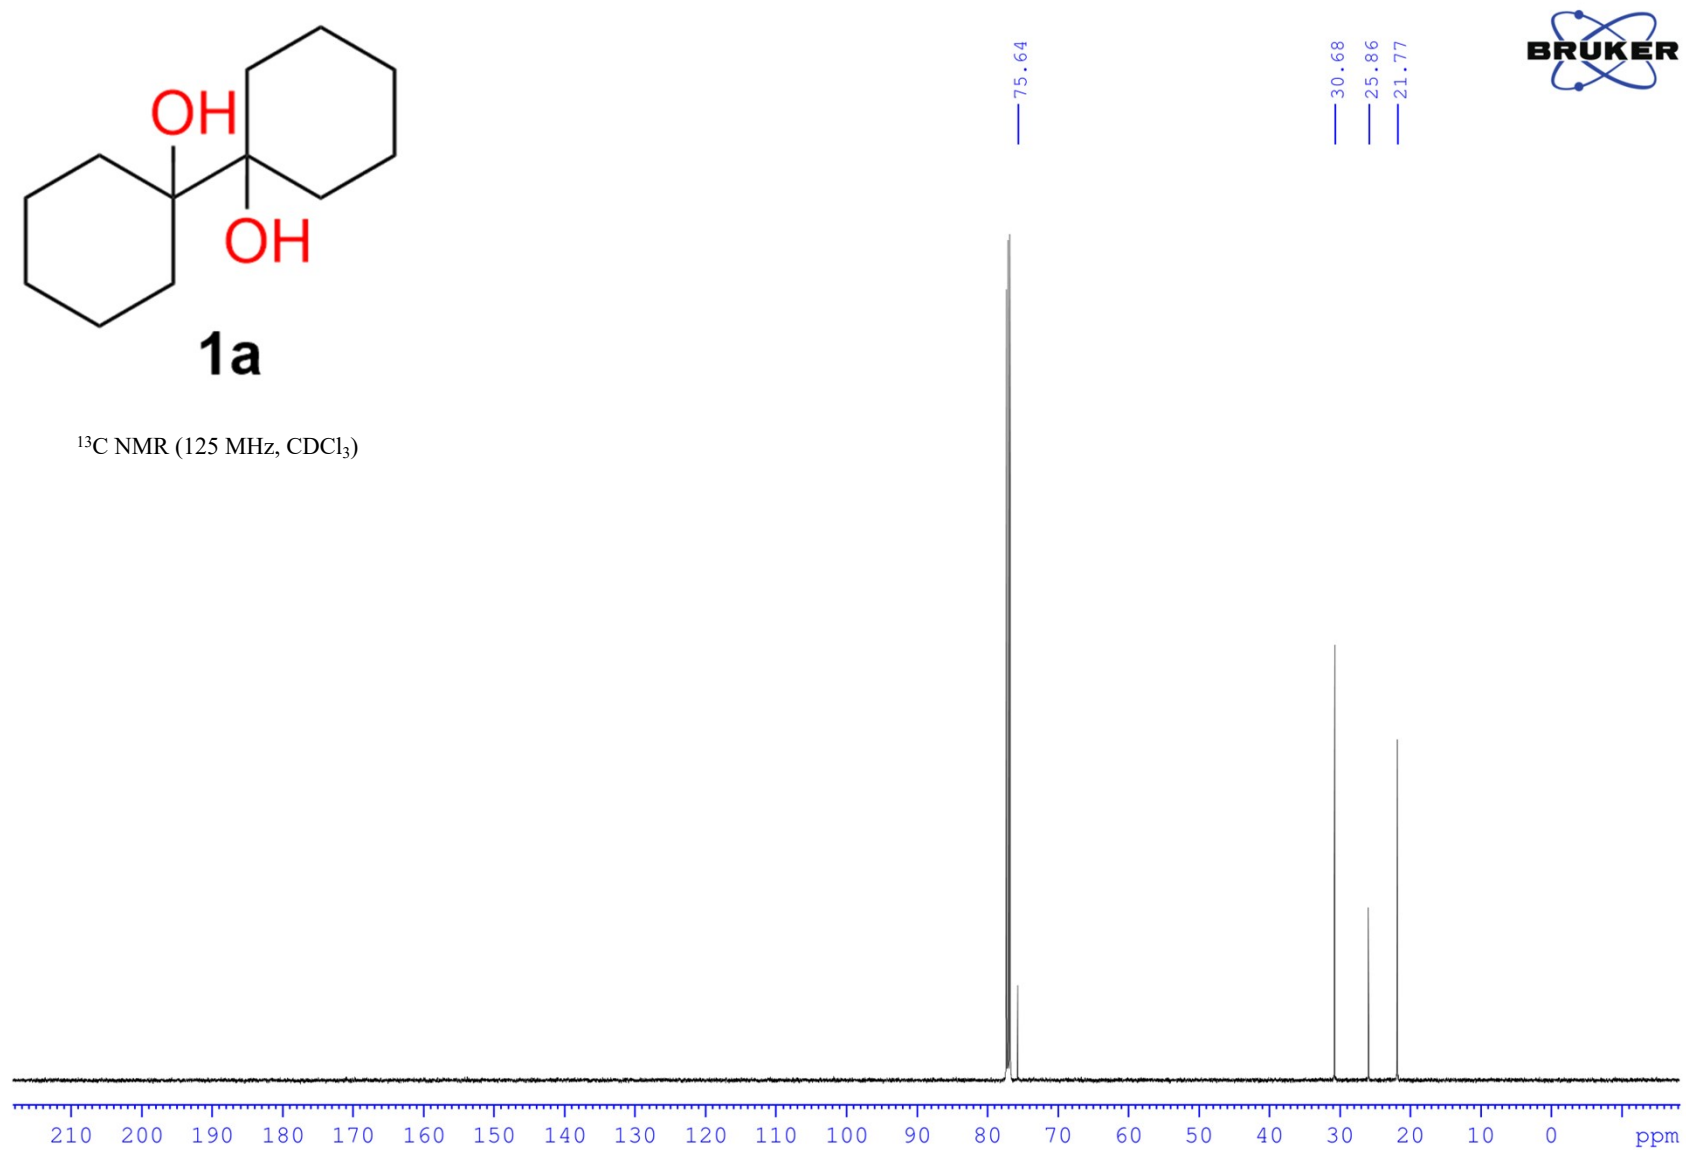

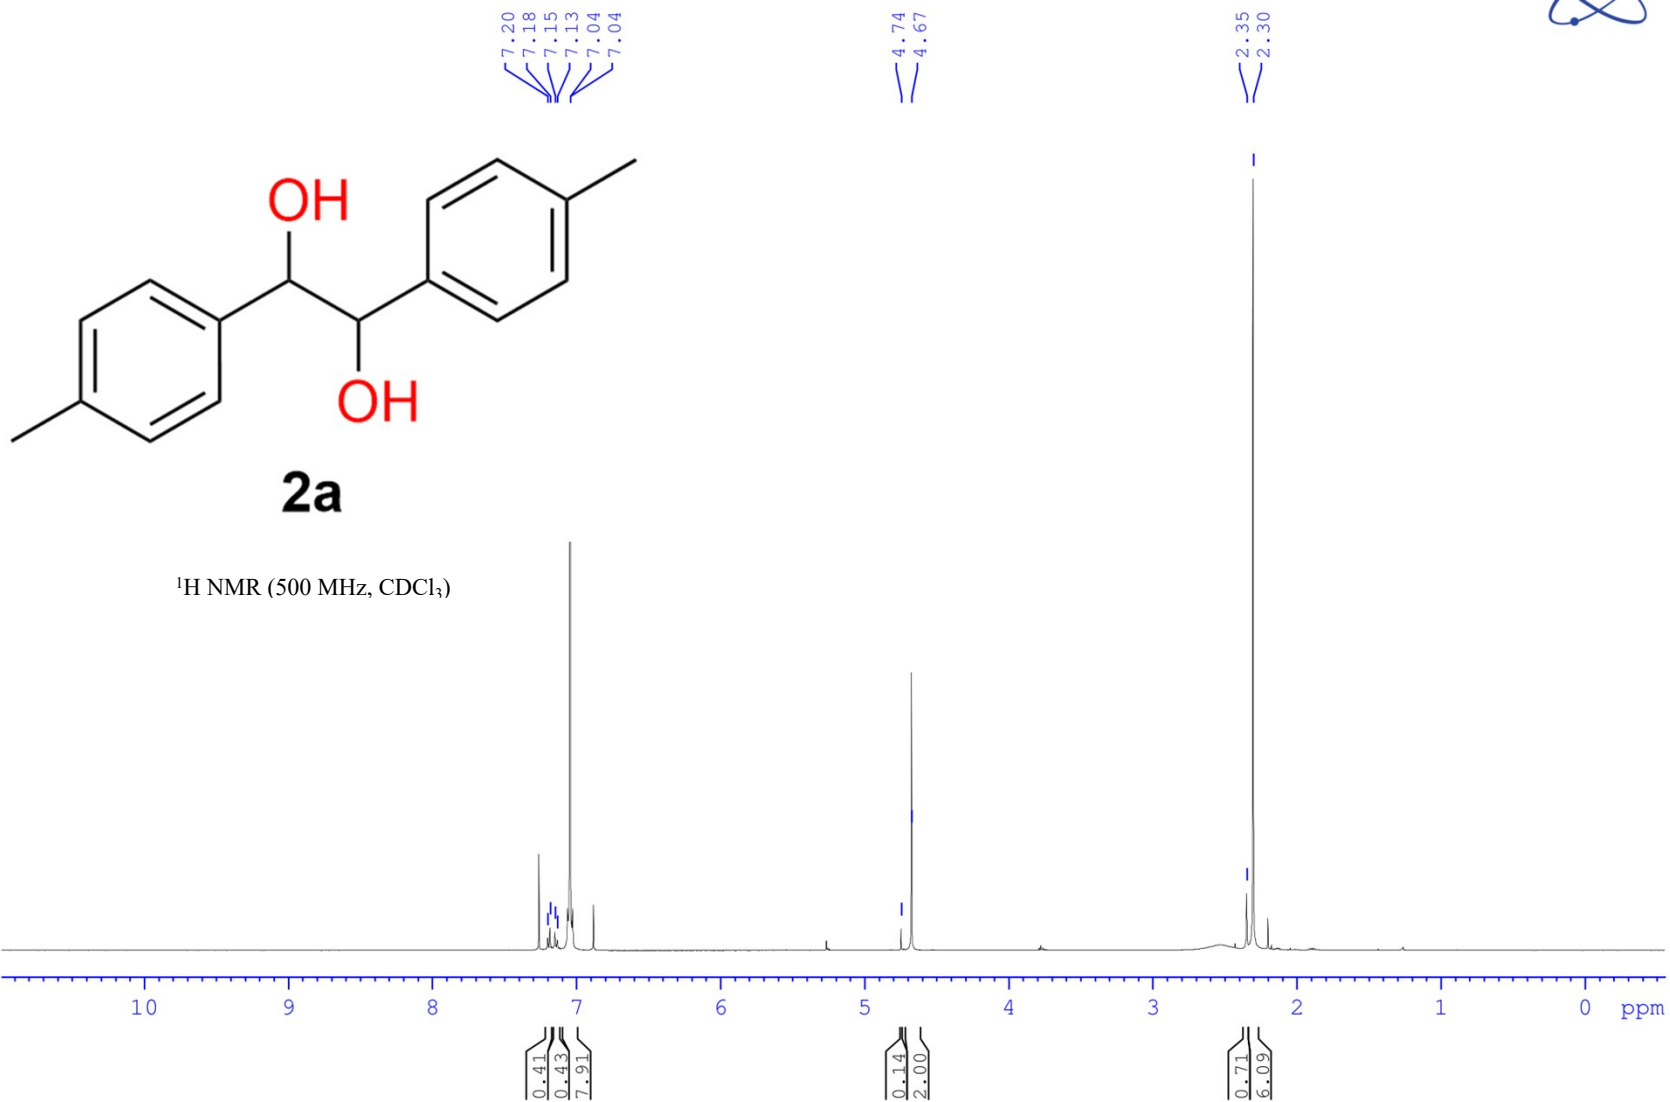



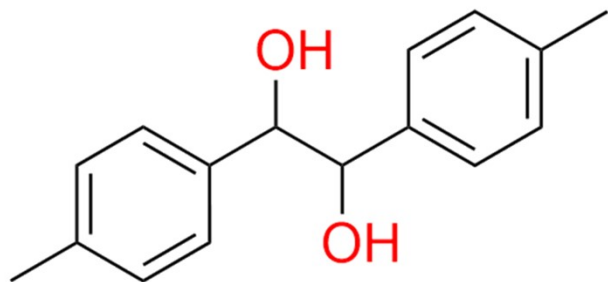

**2a**

<sup>13</sup>C NMR (125 MHz, CDCl<sub>3</sub>)

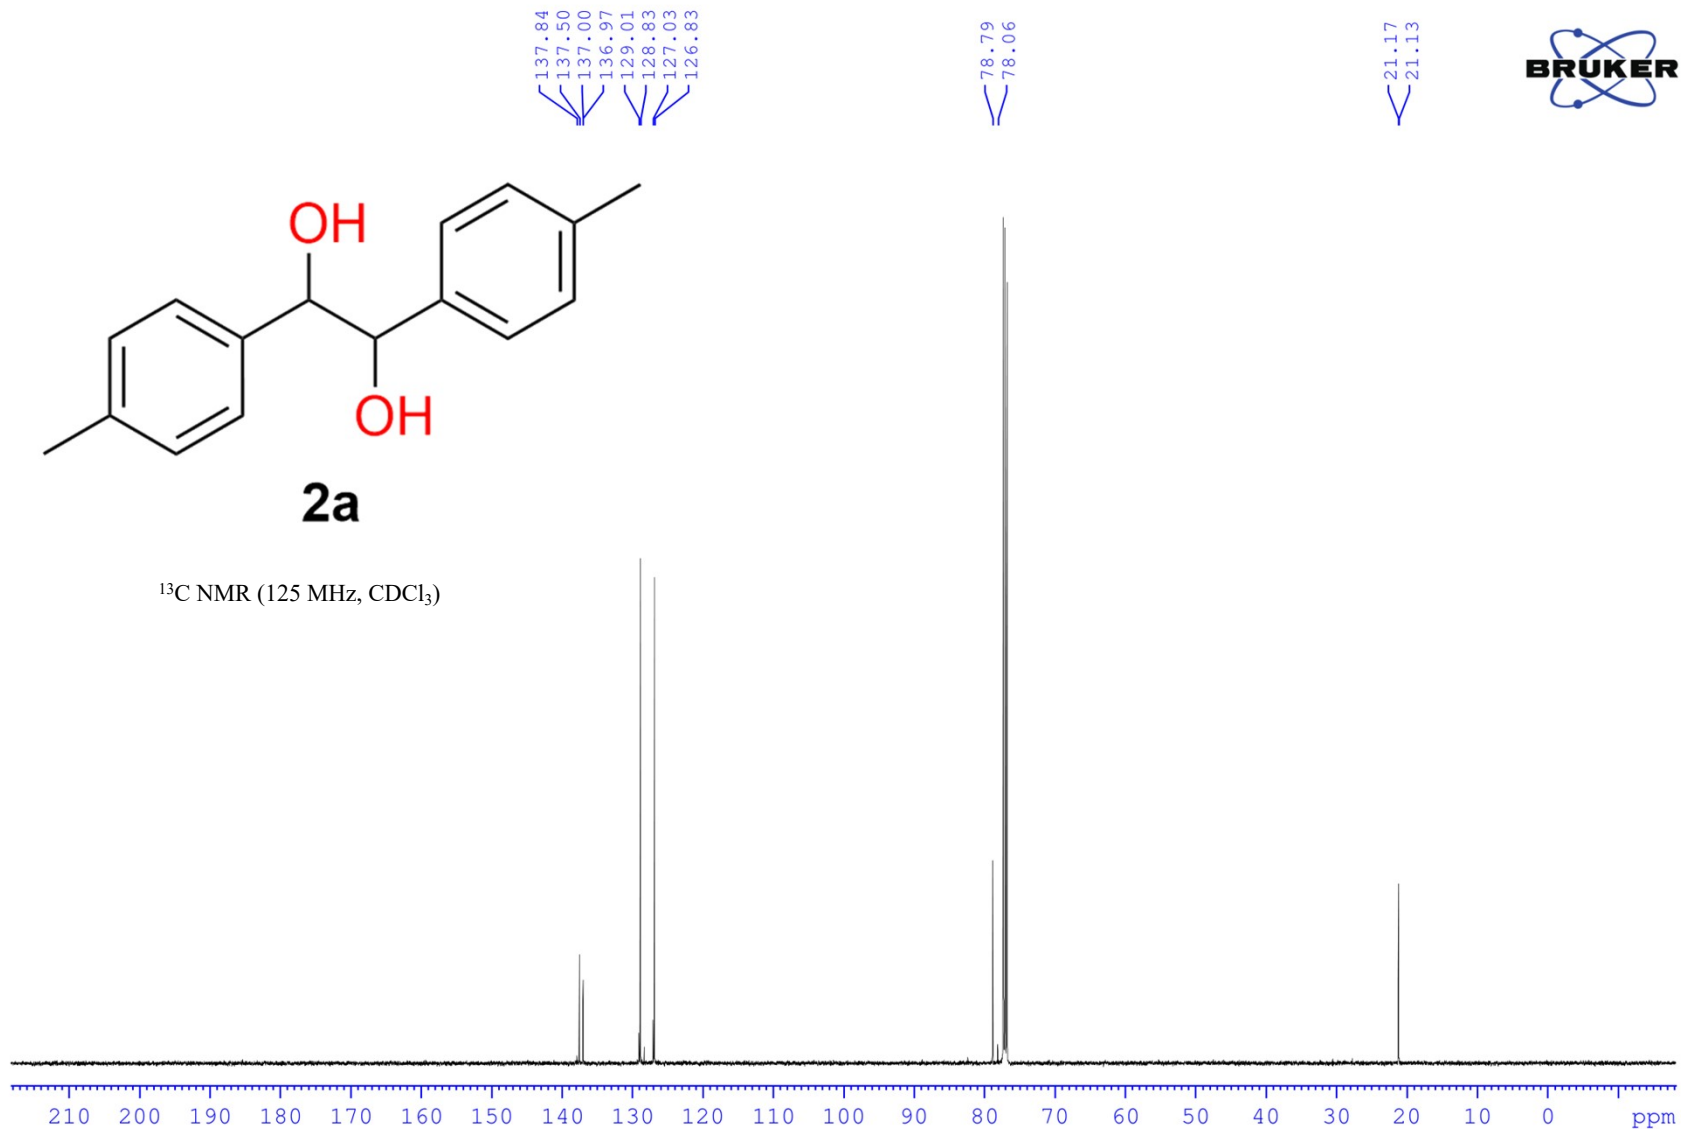

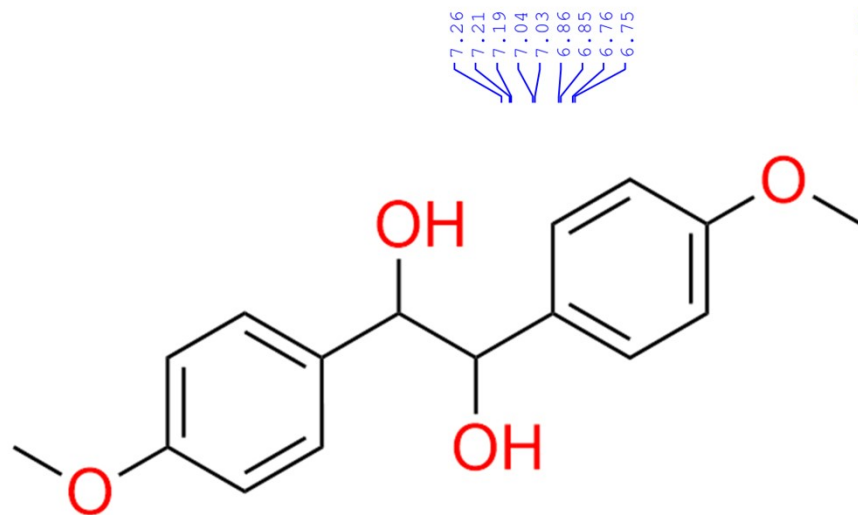

**3a**

<sup>1</sup>H NMR (500 MHz, CDCl<sub>3</sub>)

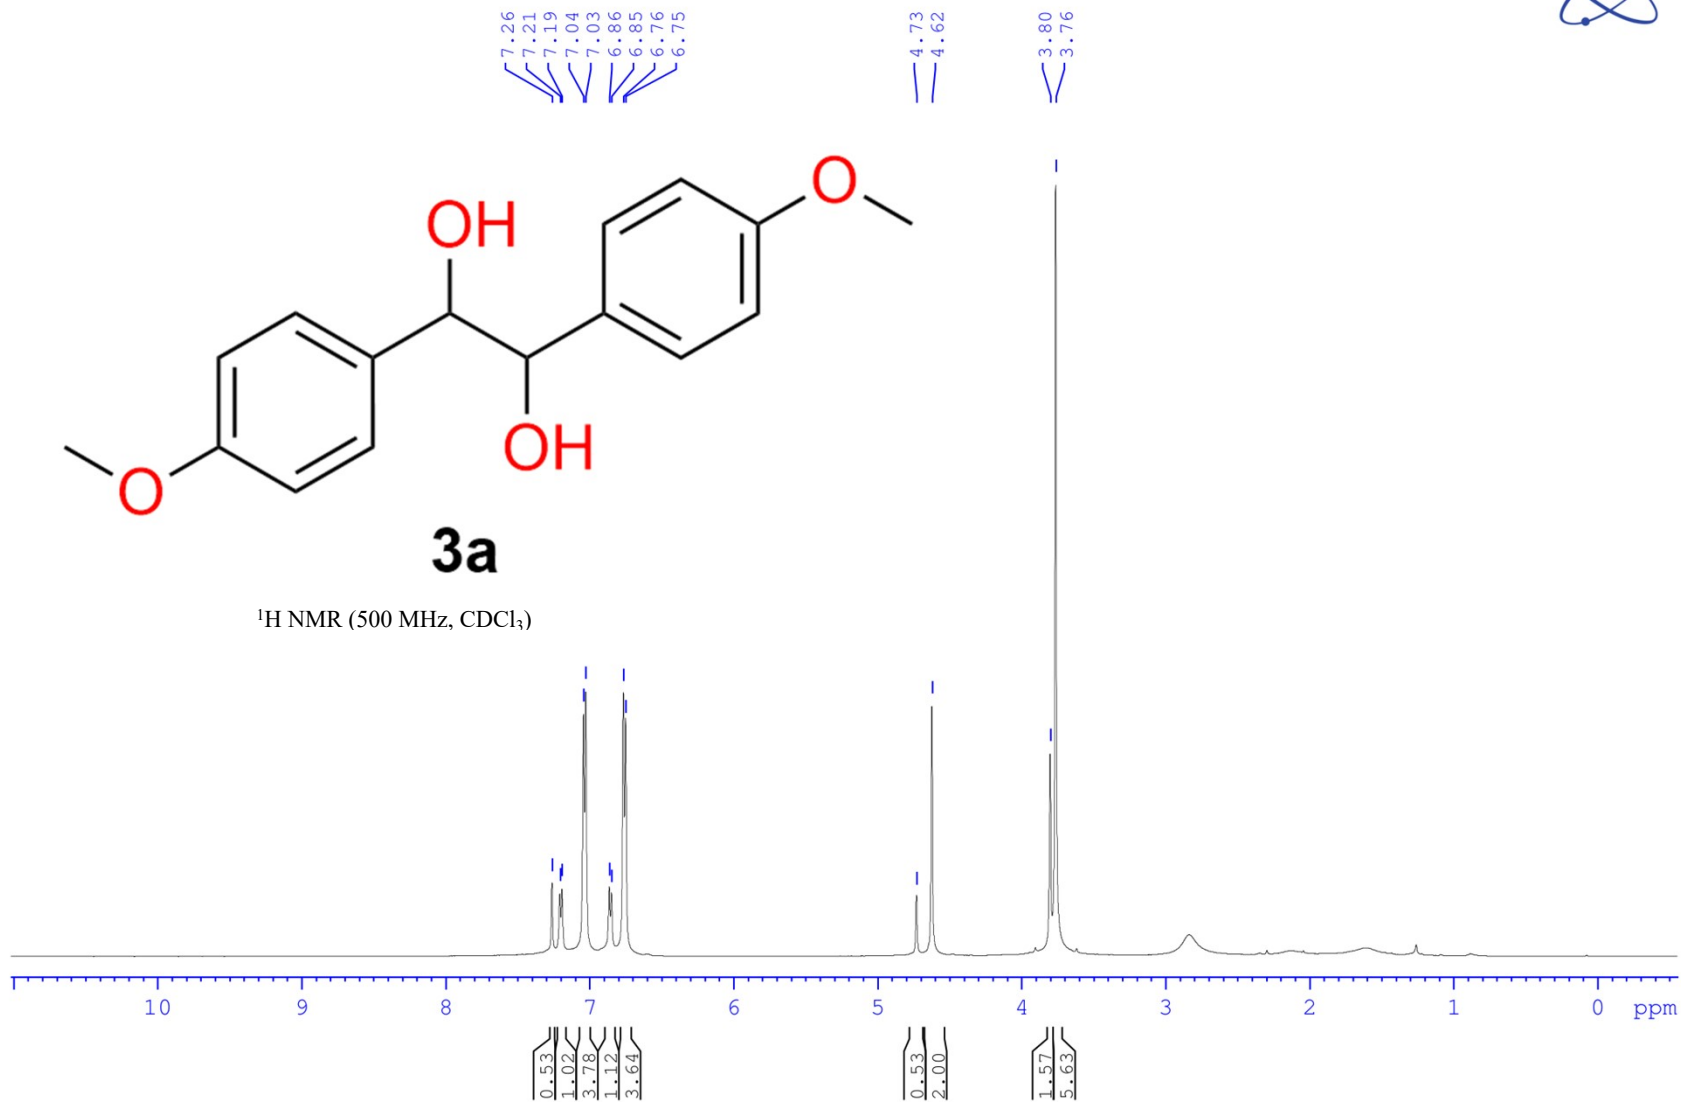

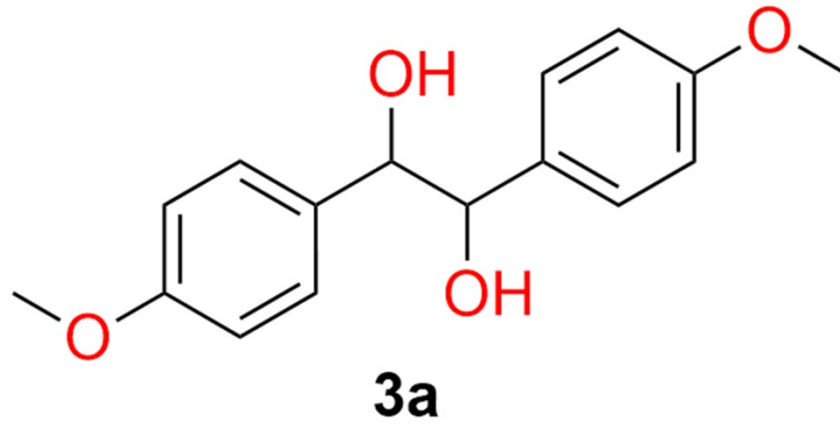

$^{13}\text{C}$  NMR (125 MHz,  $\text{CDCl}_3$ )

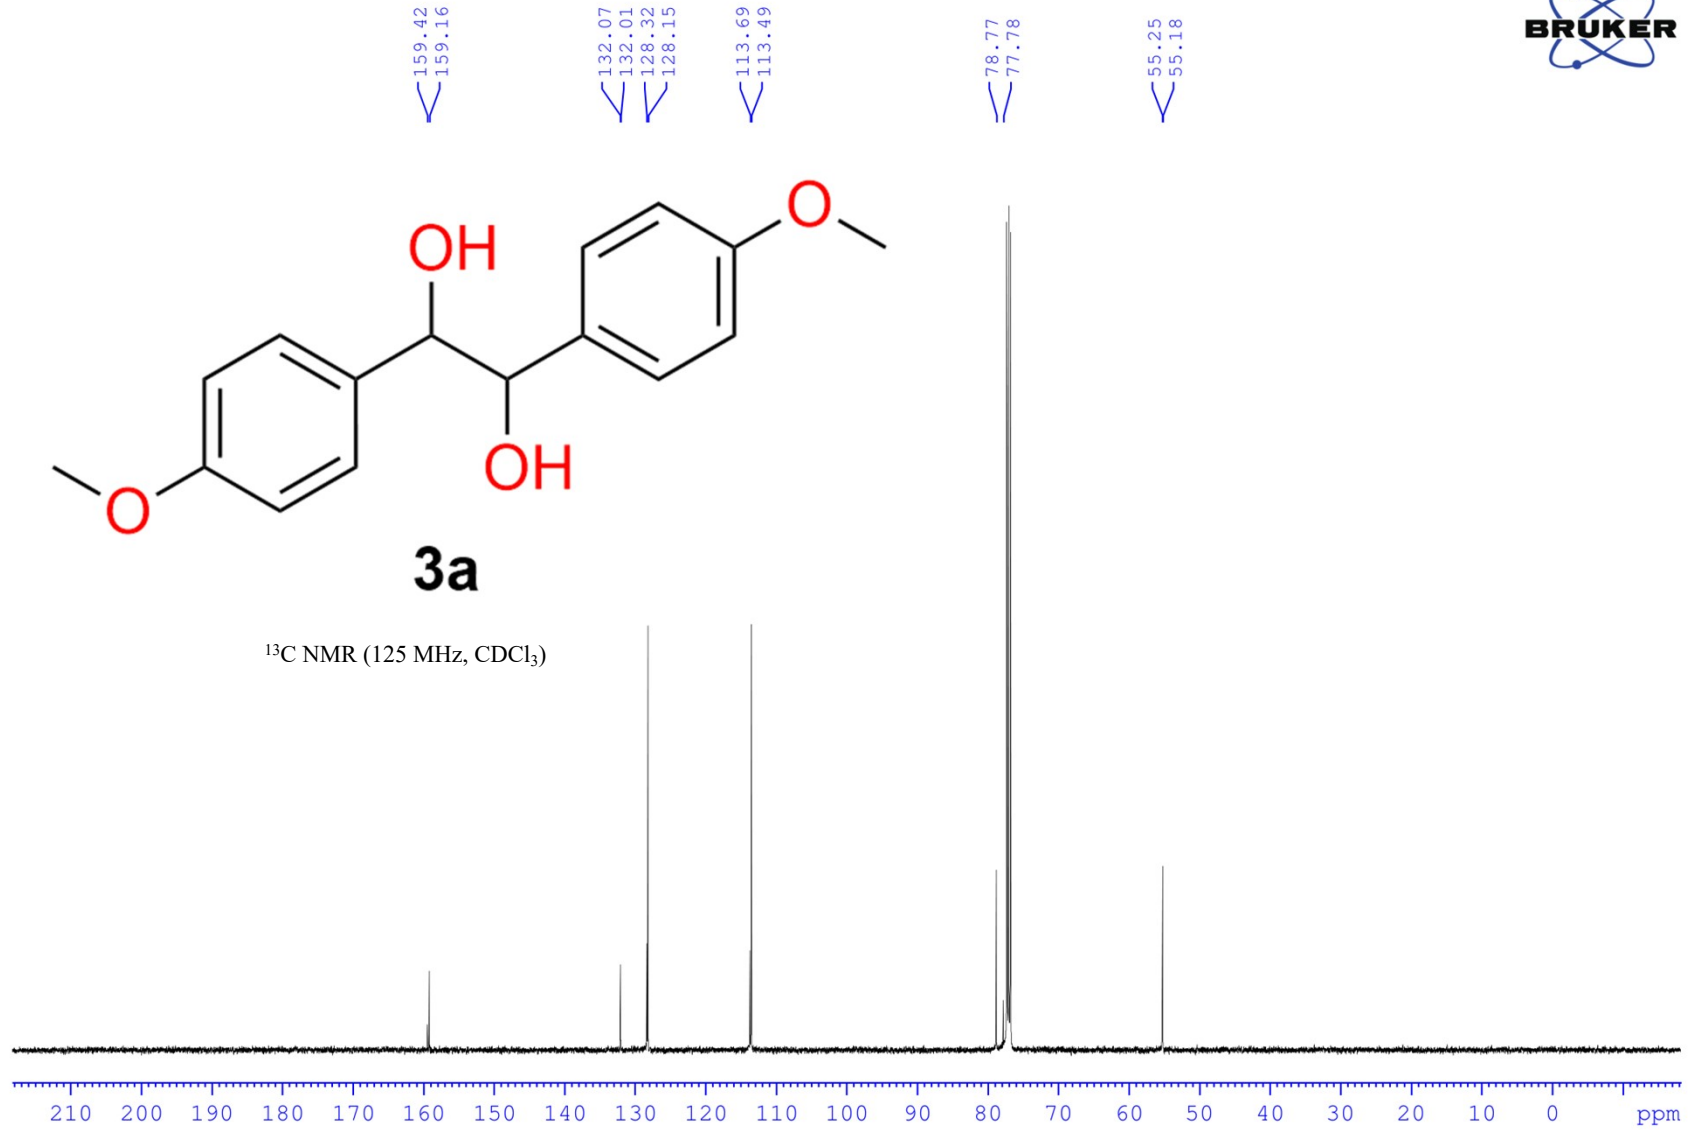

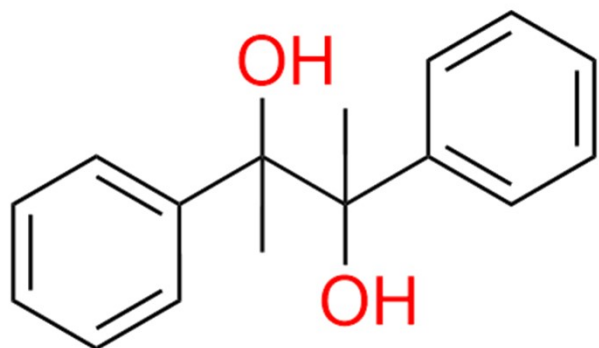

**4a**

<sup>1</sup>H NMR (500 MHz, CDCl<sub>3</sub>)

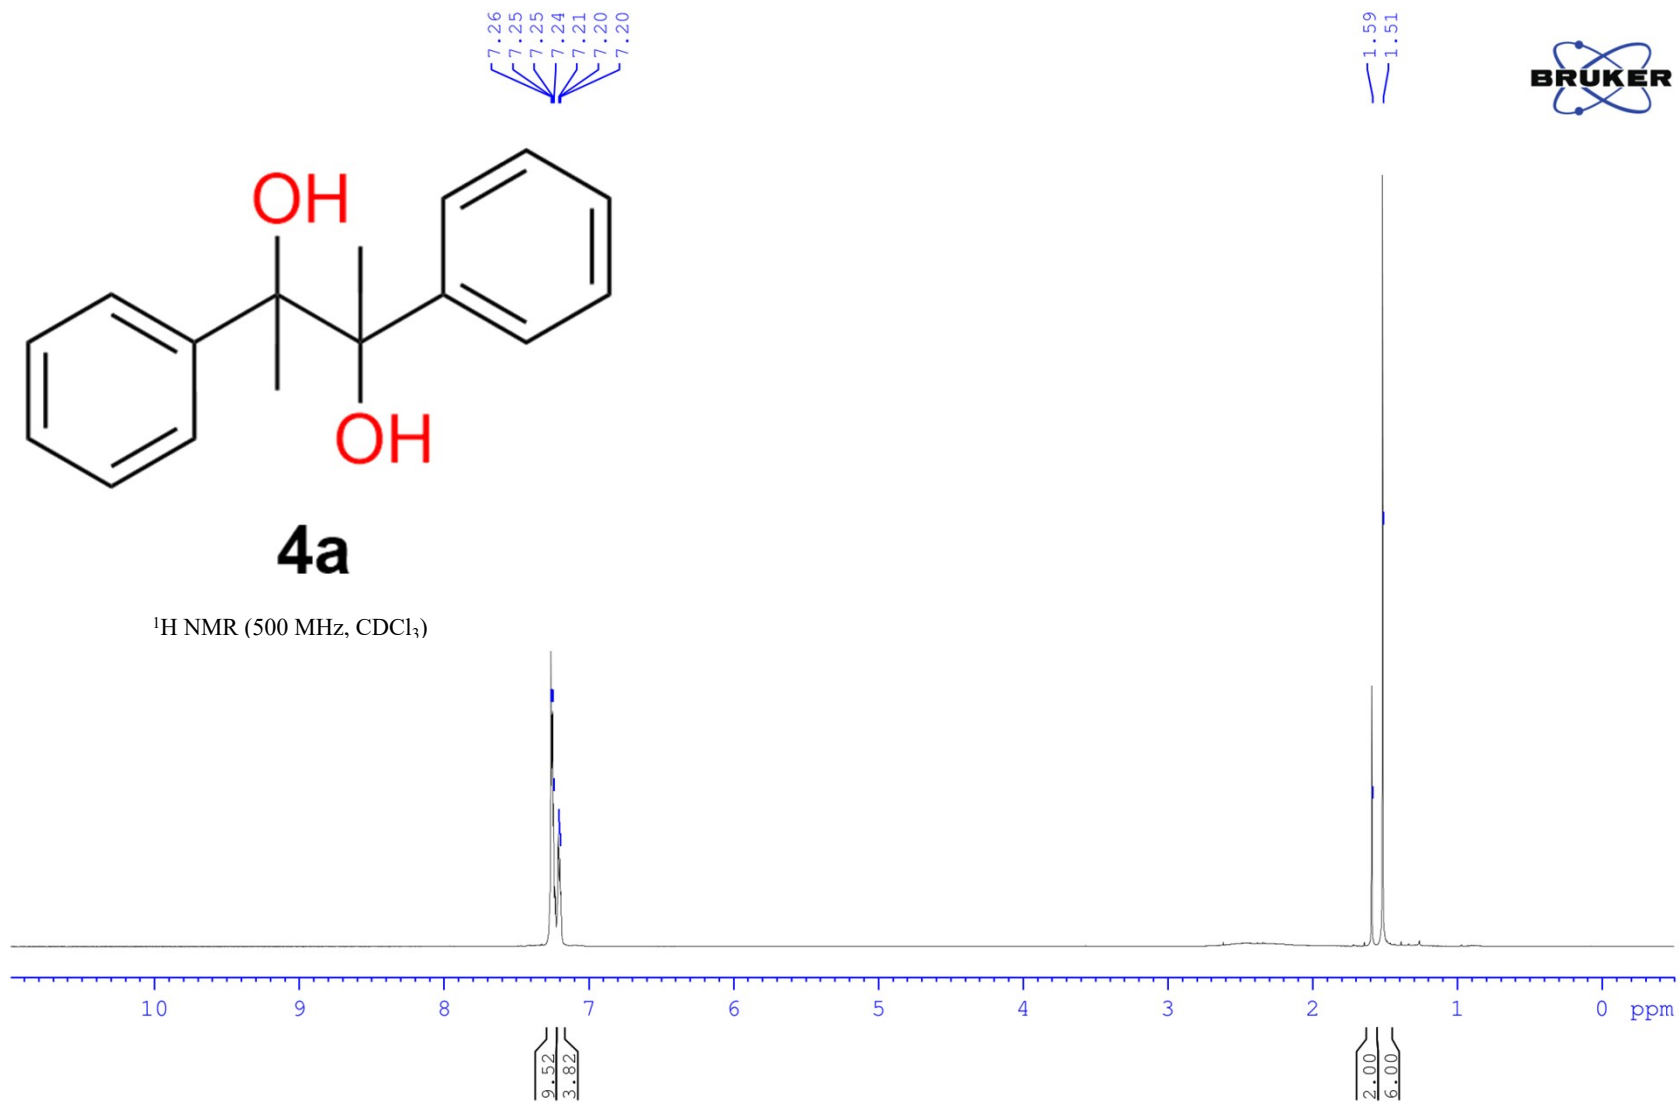

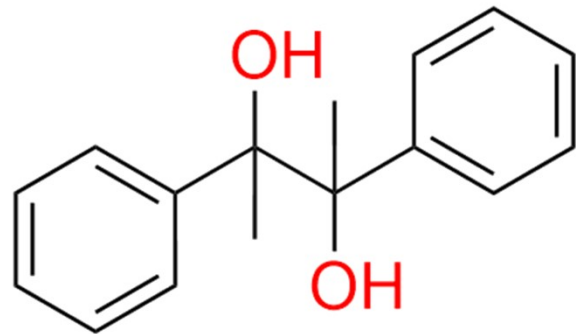

**4a**

<sup>13</sup>C NMR (125 MHz, CDCl<sub>3</sub>)

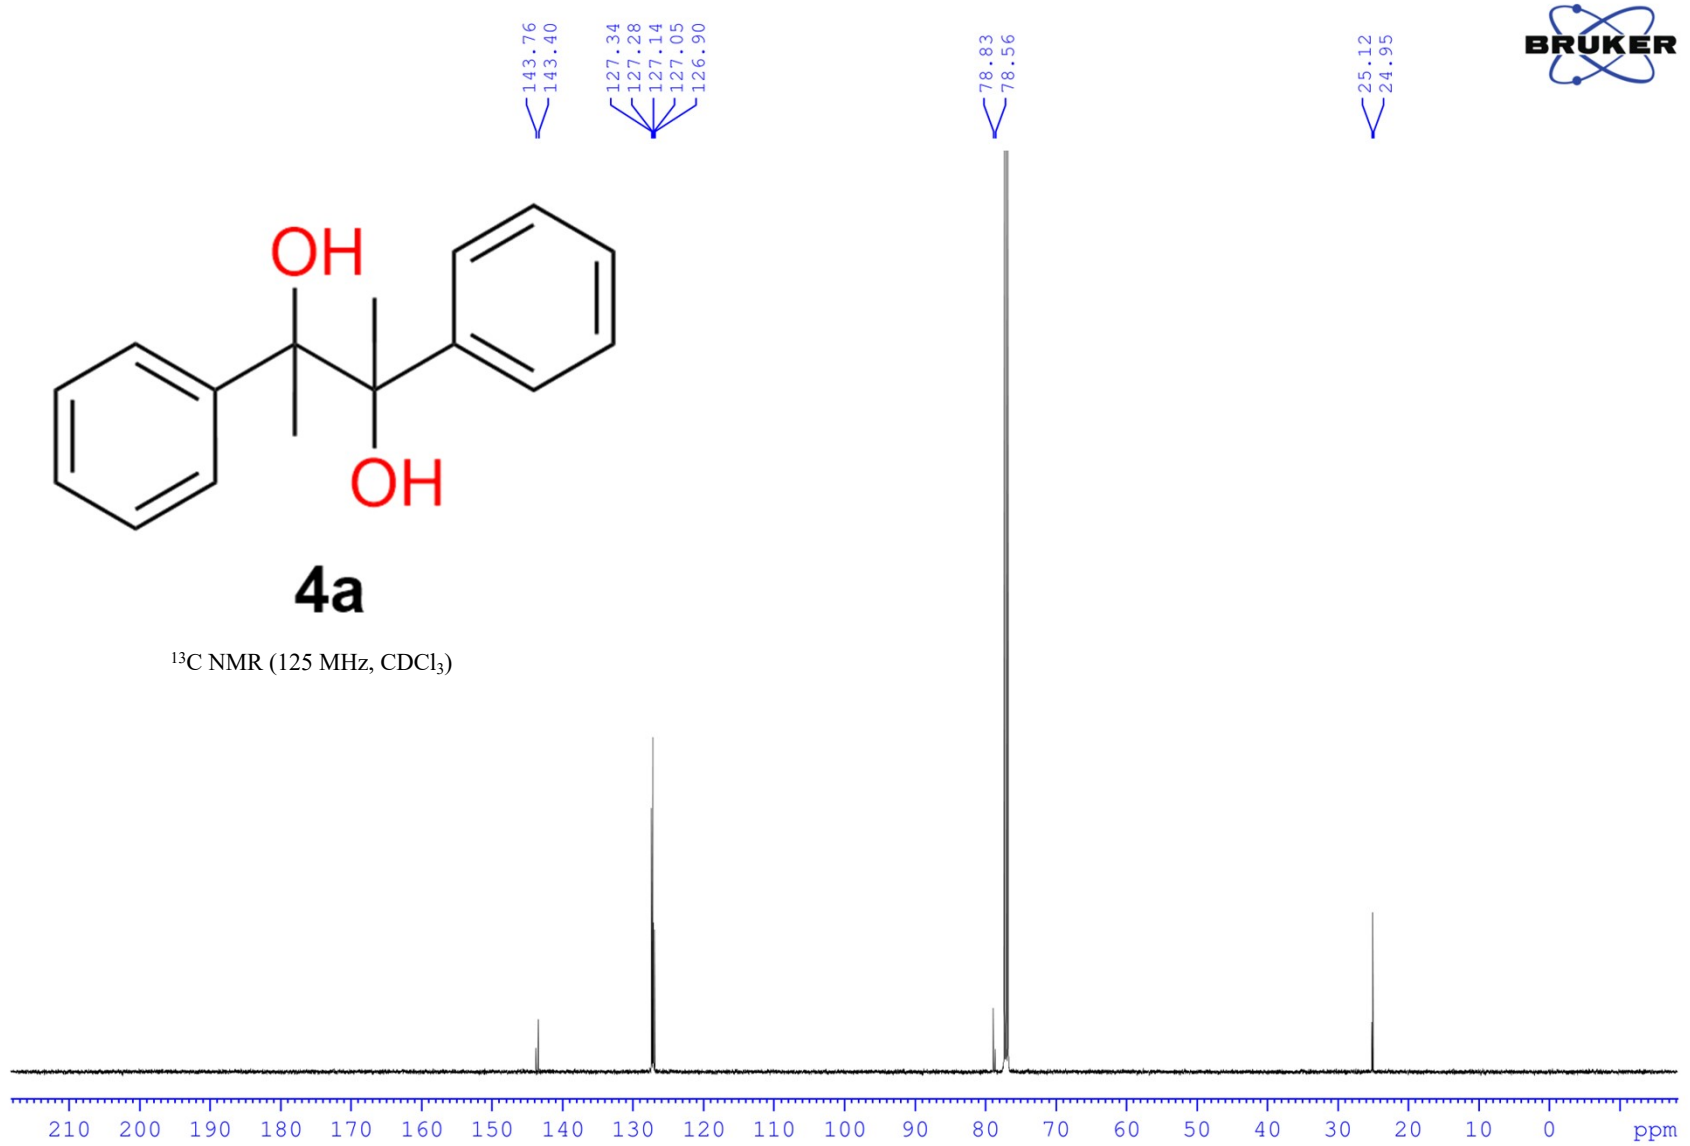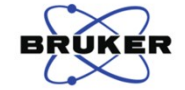

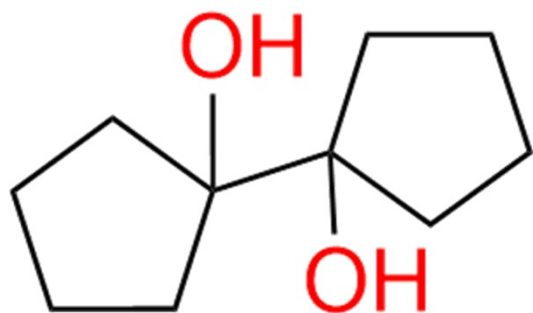

**5a**

<sup>1</sup>H NMR (500 MHz, CDCl<sub>3</sub>)

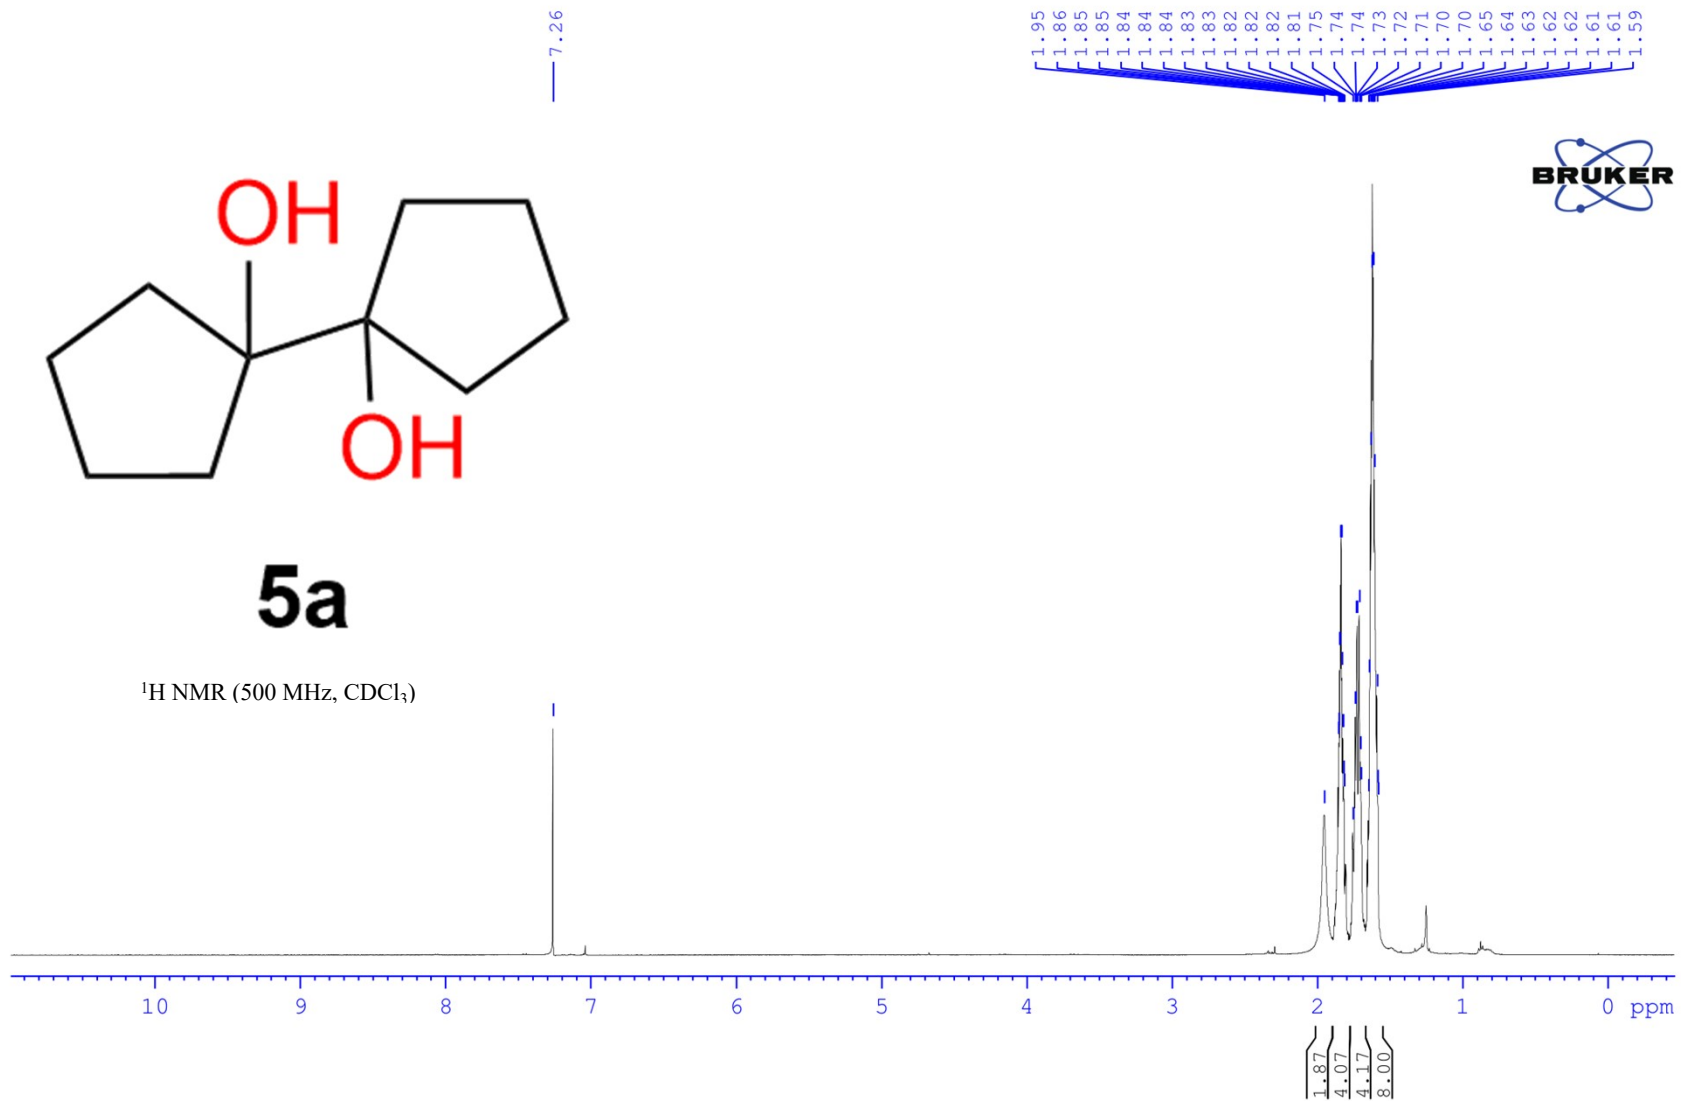

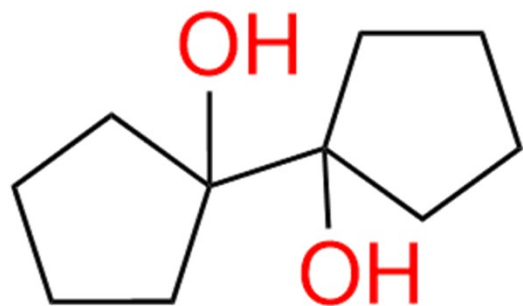

**5a**

<sup>13</sup>C NMR (125 MHz, CDCl<sub>3</sub>)

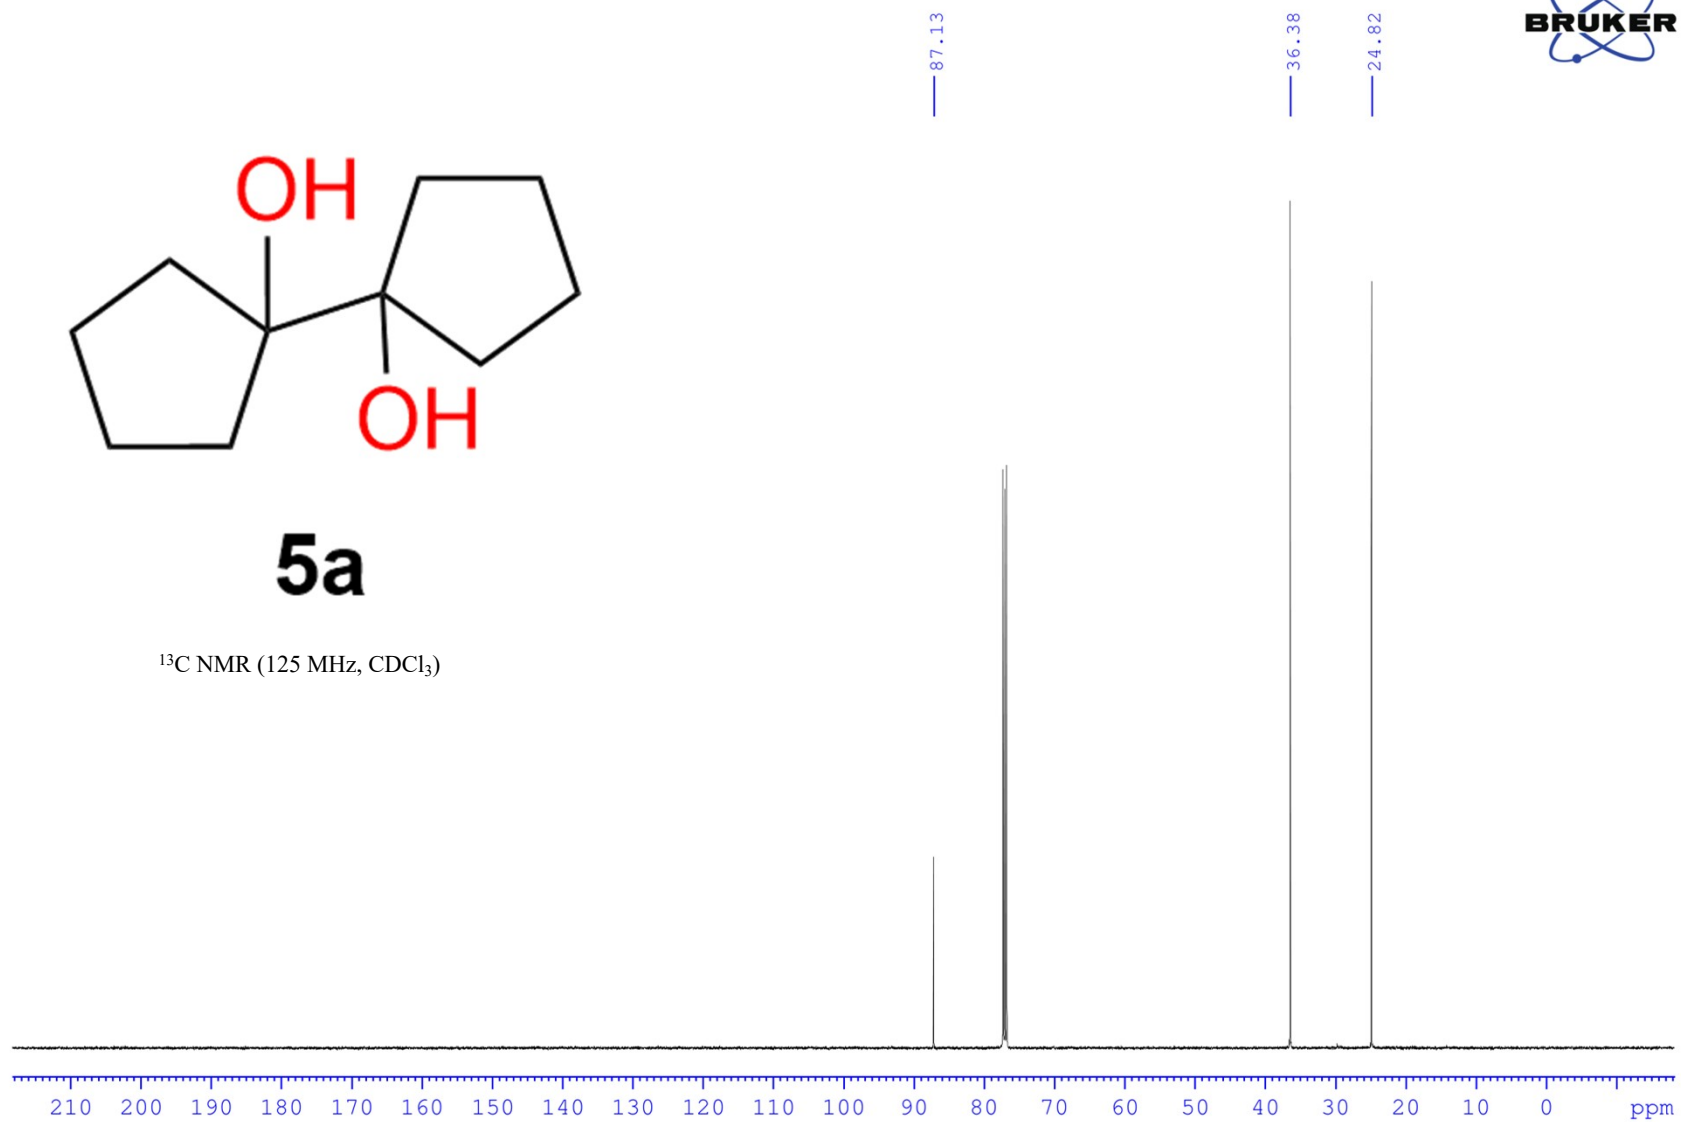

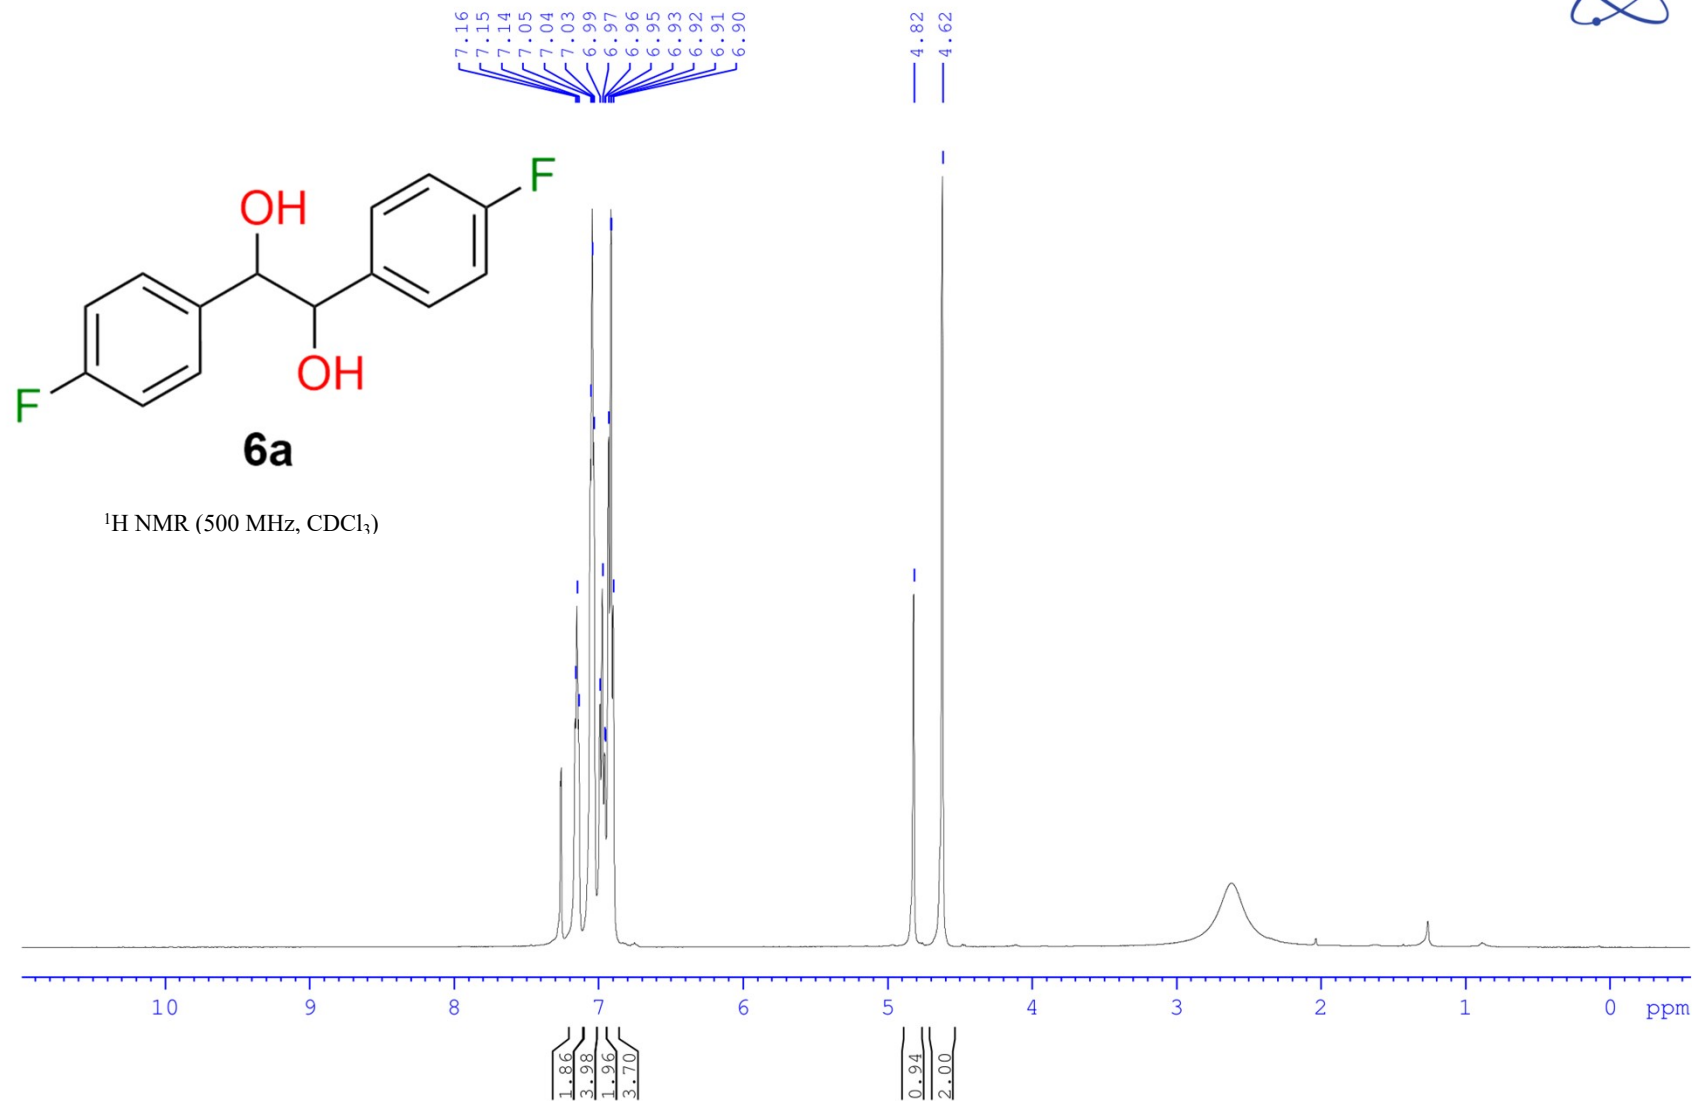



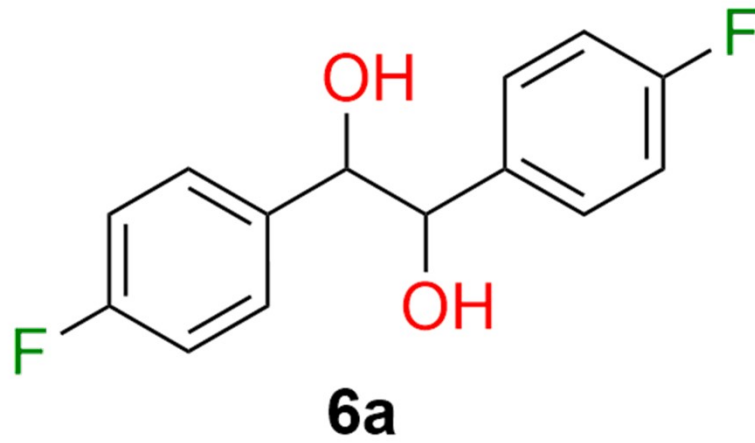

$^{13}\text{C}$  NMR (125 MHz,  $\text{CDCl}_3$ )

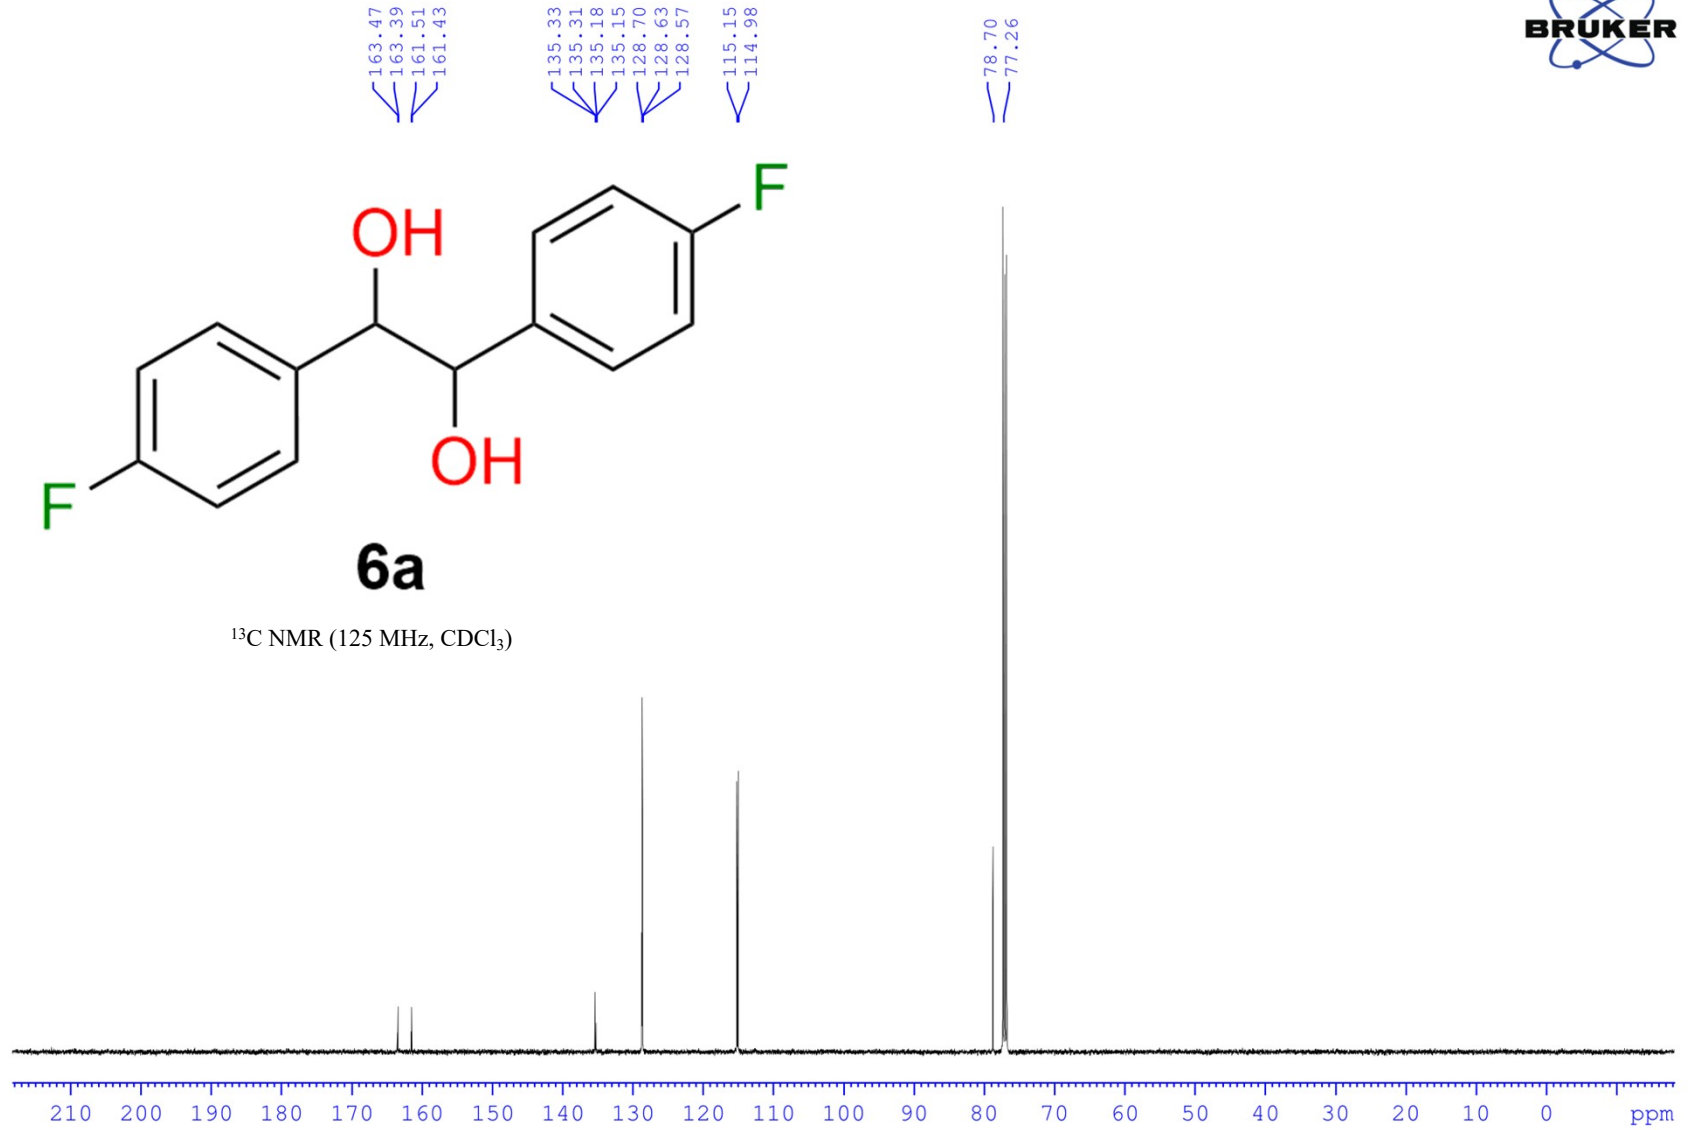

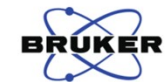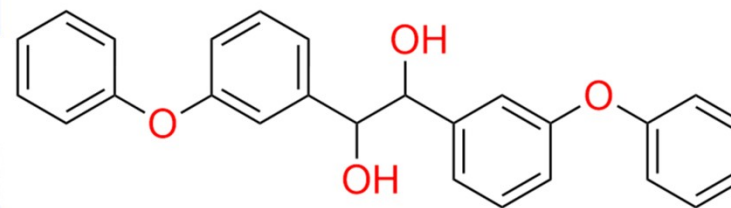

**7a**

<sup>1</sup>H NMR (500 MHz, CDCl<sub>3</sub>)

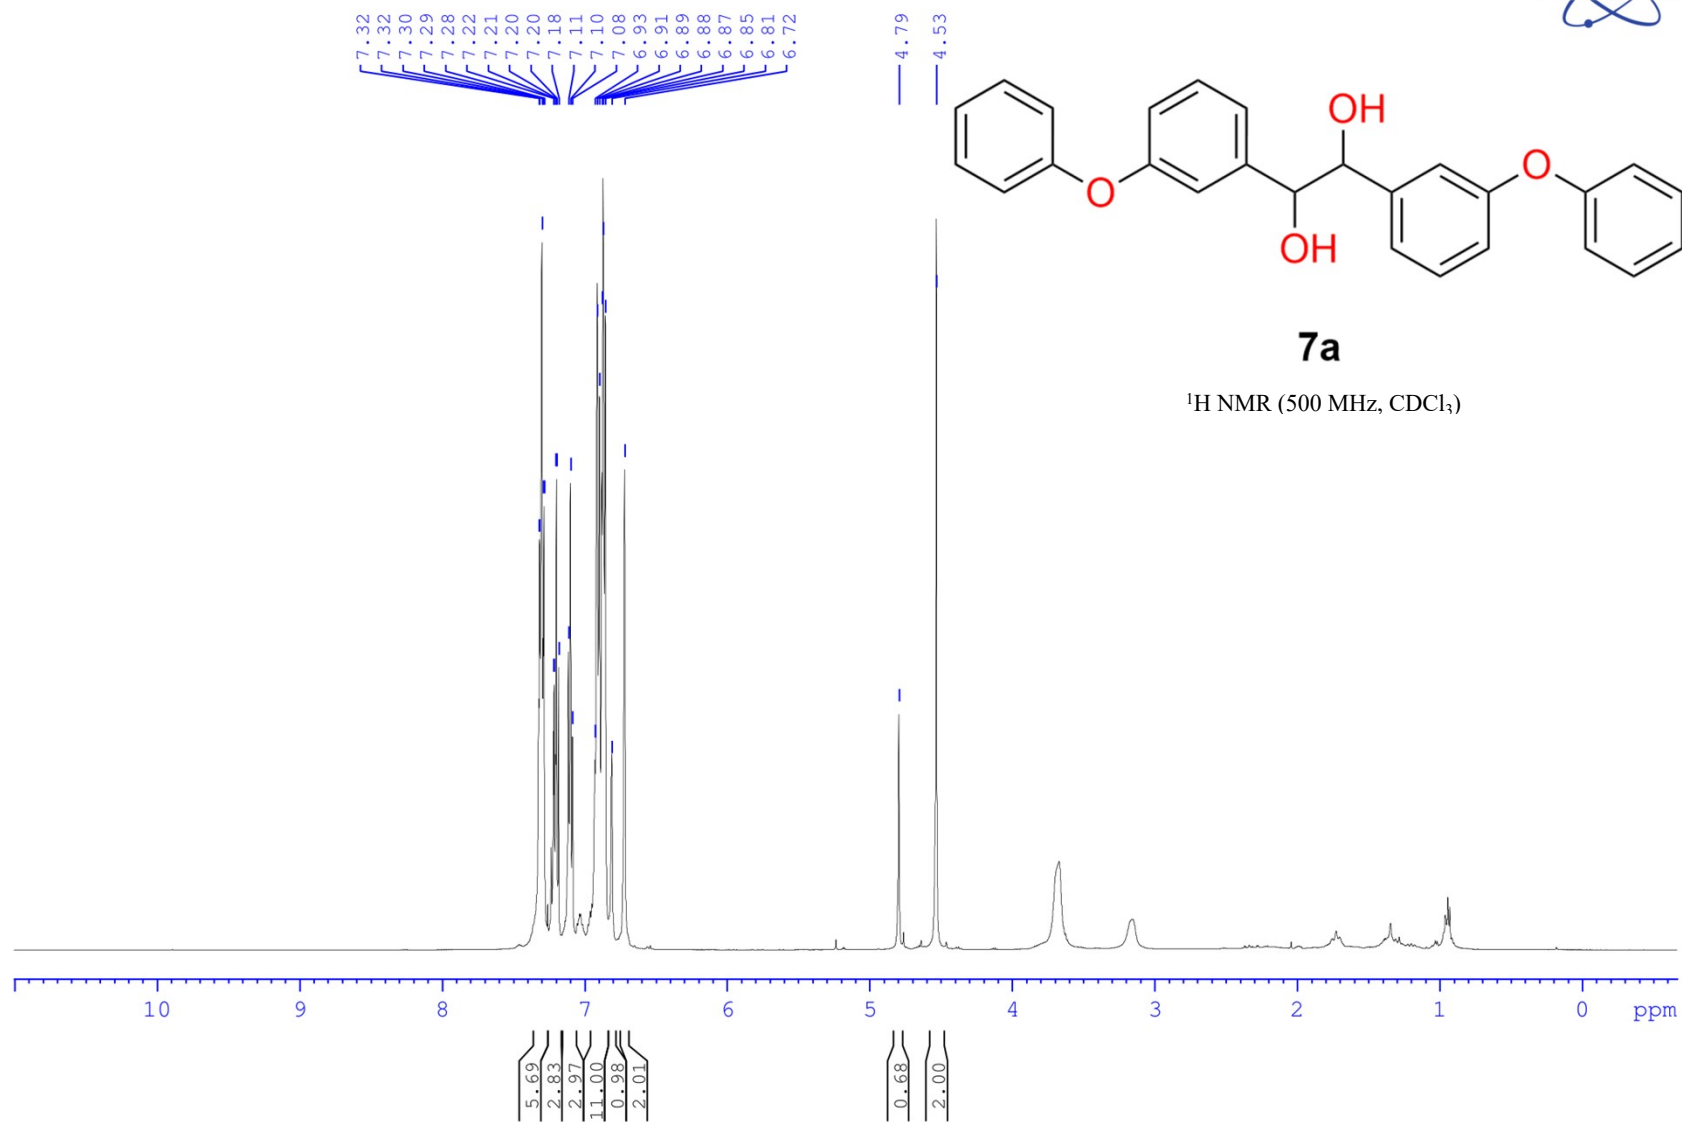

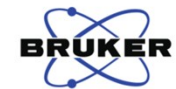

157.15  
156.84  
156.81

141.86  
141.50  
129.81  
129.65  
129.41  
123.22  
121.96  
118.71  
118.66  
118.64  
118.45  
117.89  
117.67

79.01  
77.27

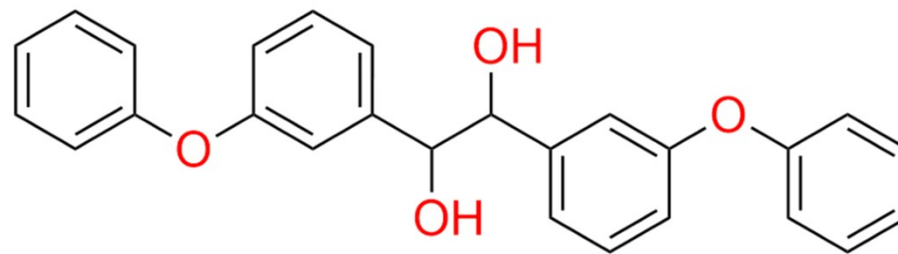

**7a**

<sup>13</sup>C NMR (125 MHz, CDCl<sub>3</sub>)

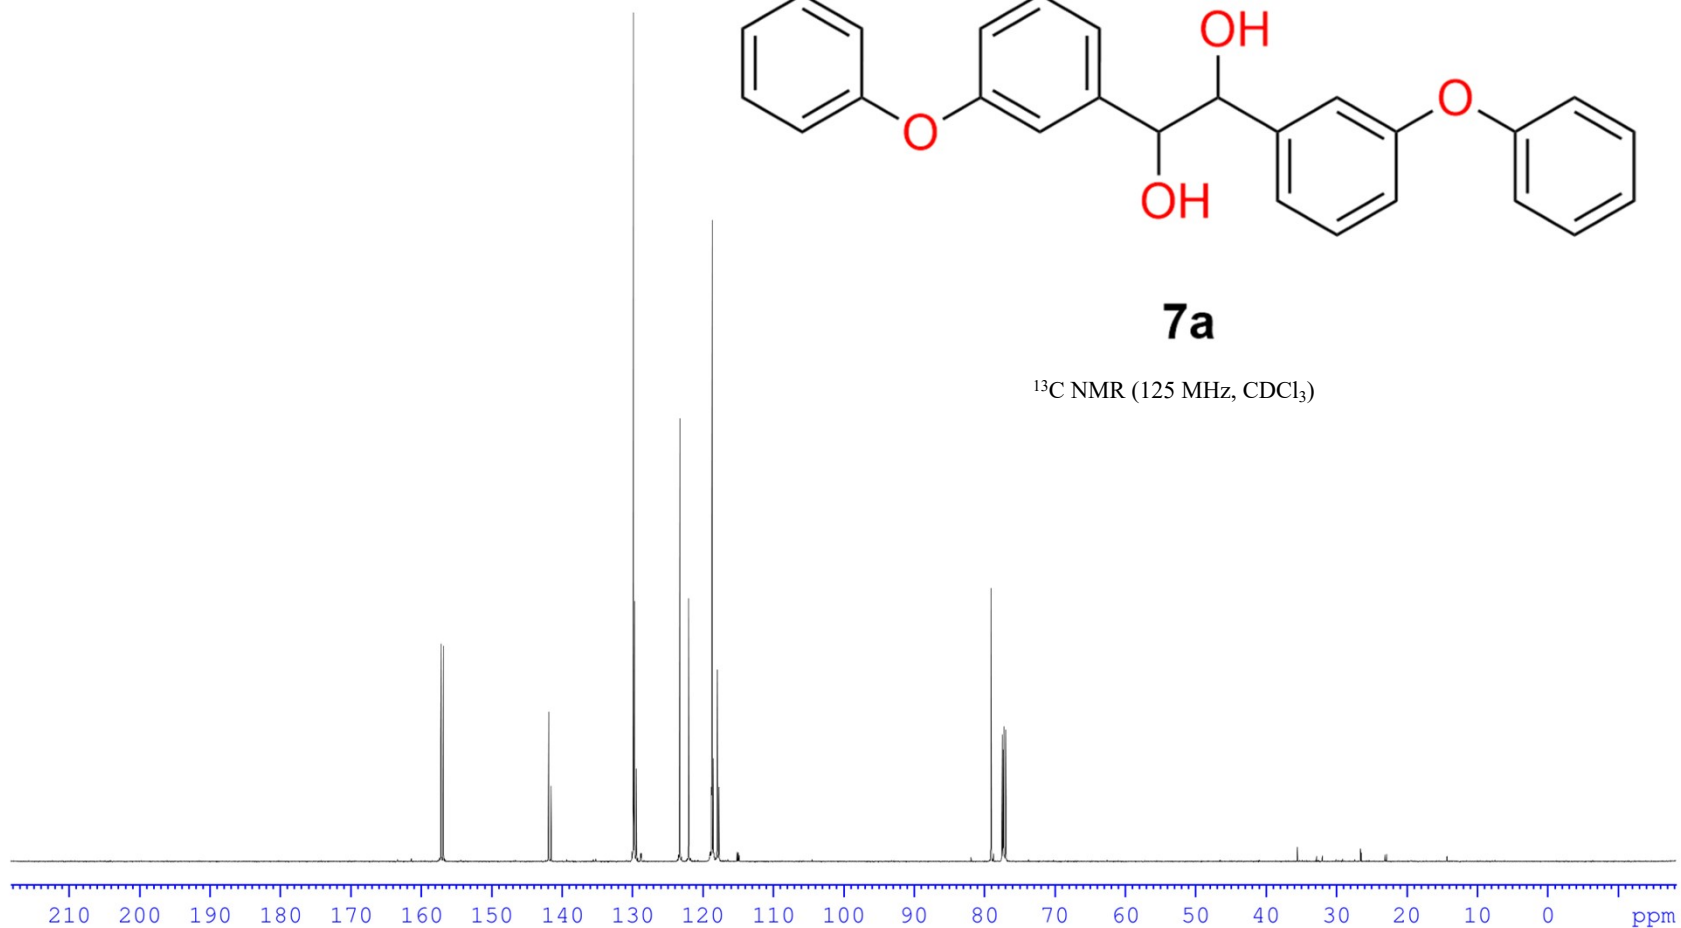

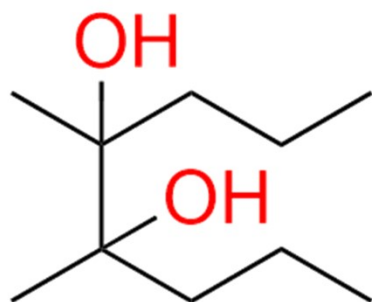

**8a**

<sup>1</sup>H NMR (500 MHz, CDCl<sub>3</sub>)

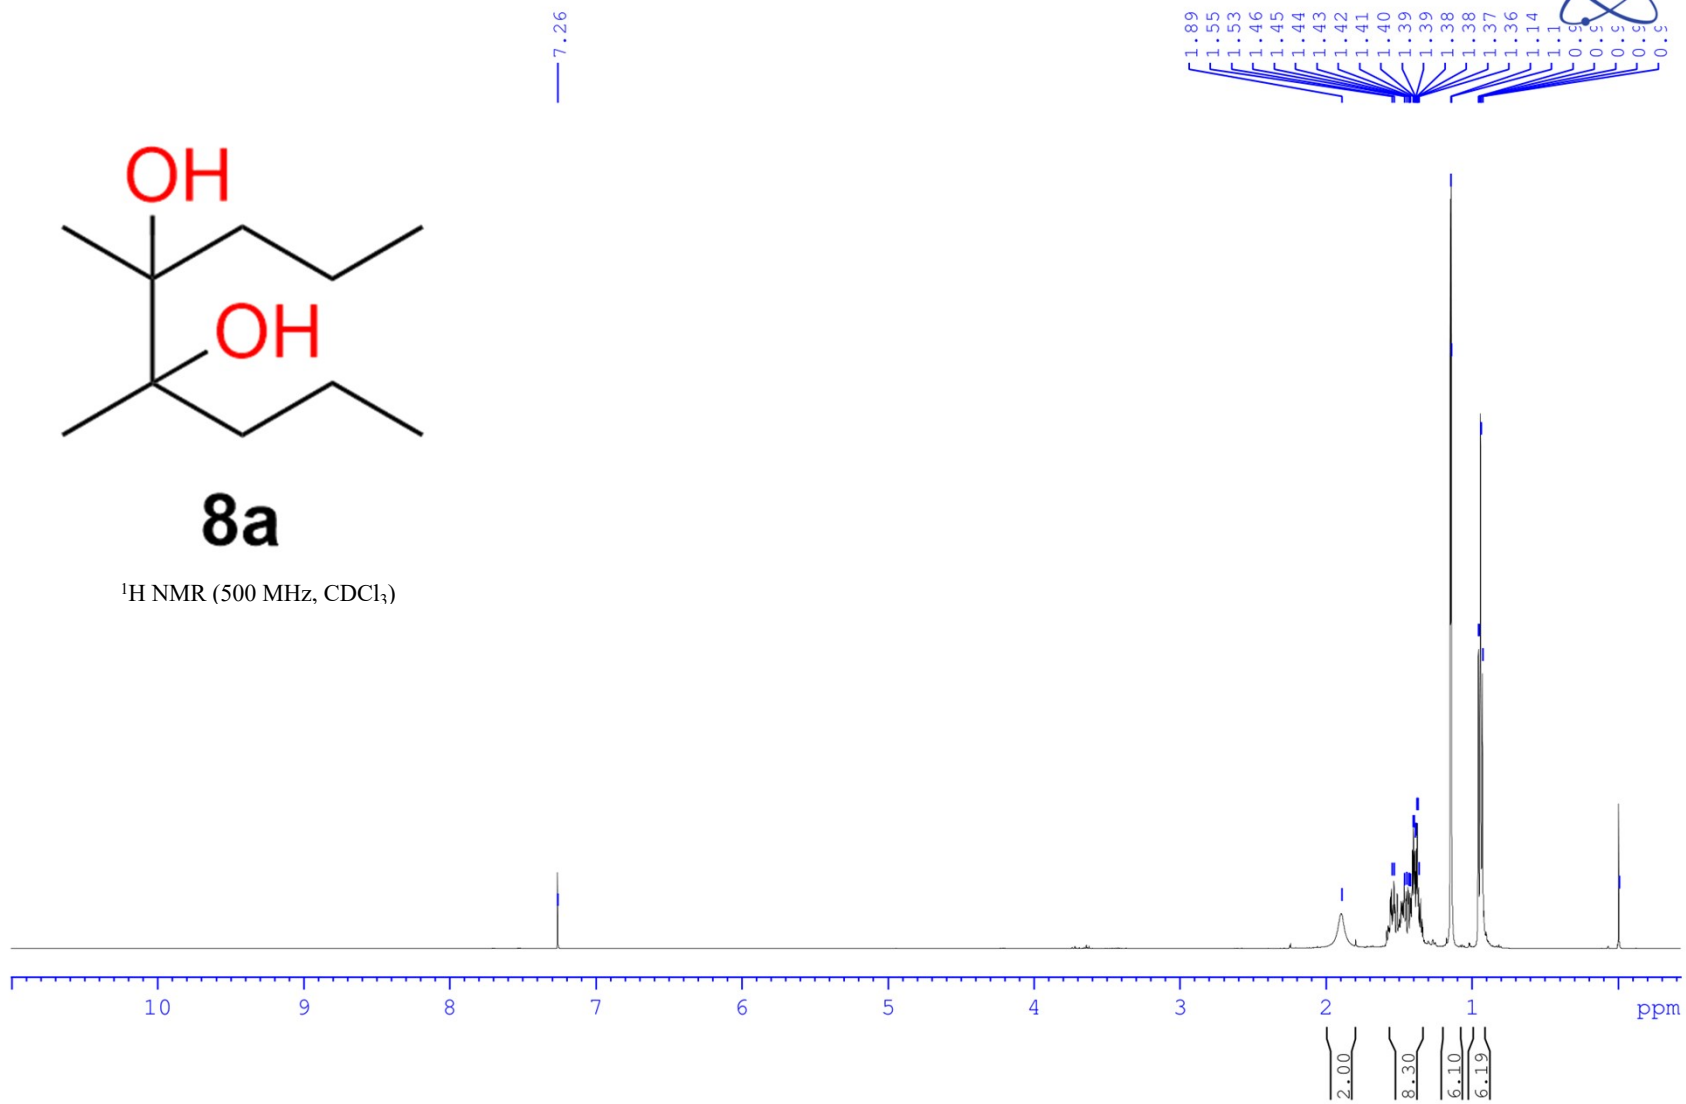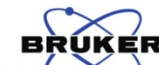

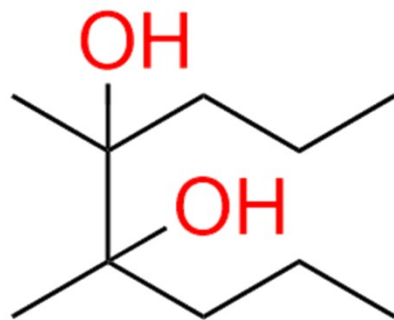

**8a**

$^{13}\text{C}$  NMR (125 MHz,  $\text{CDCl}_3$ )

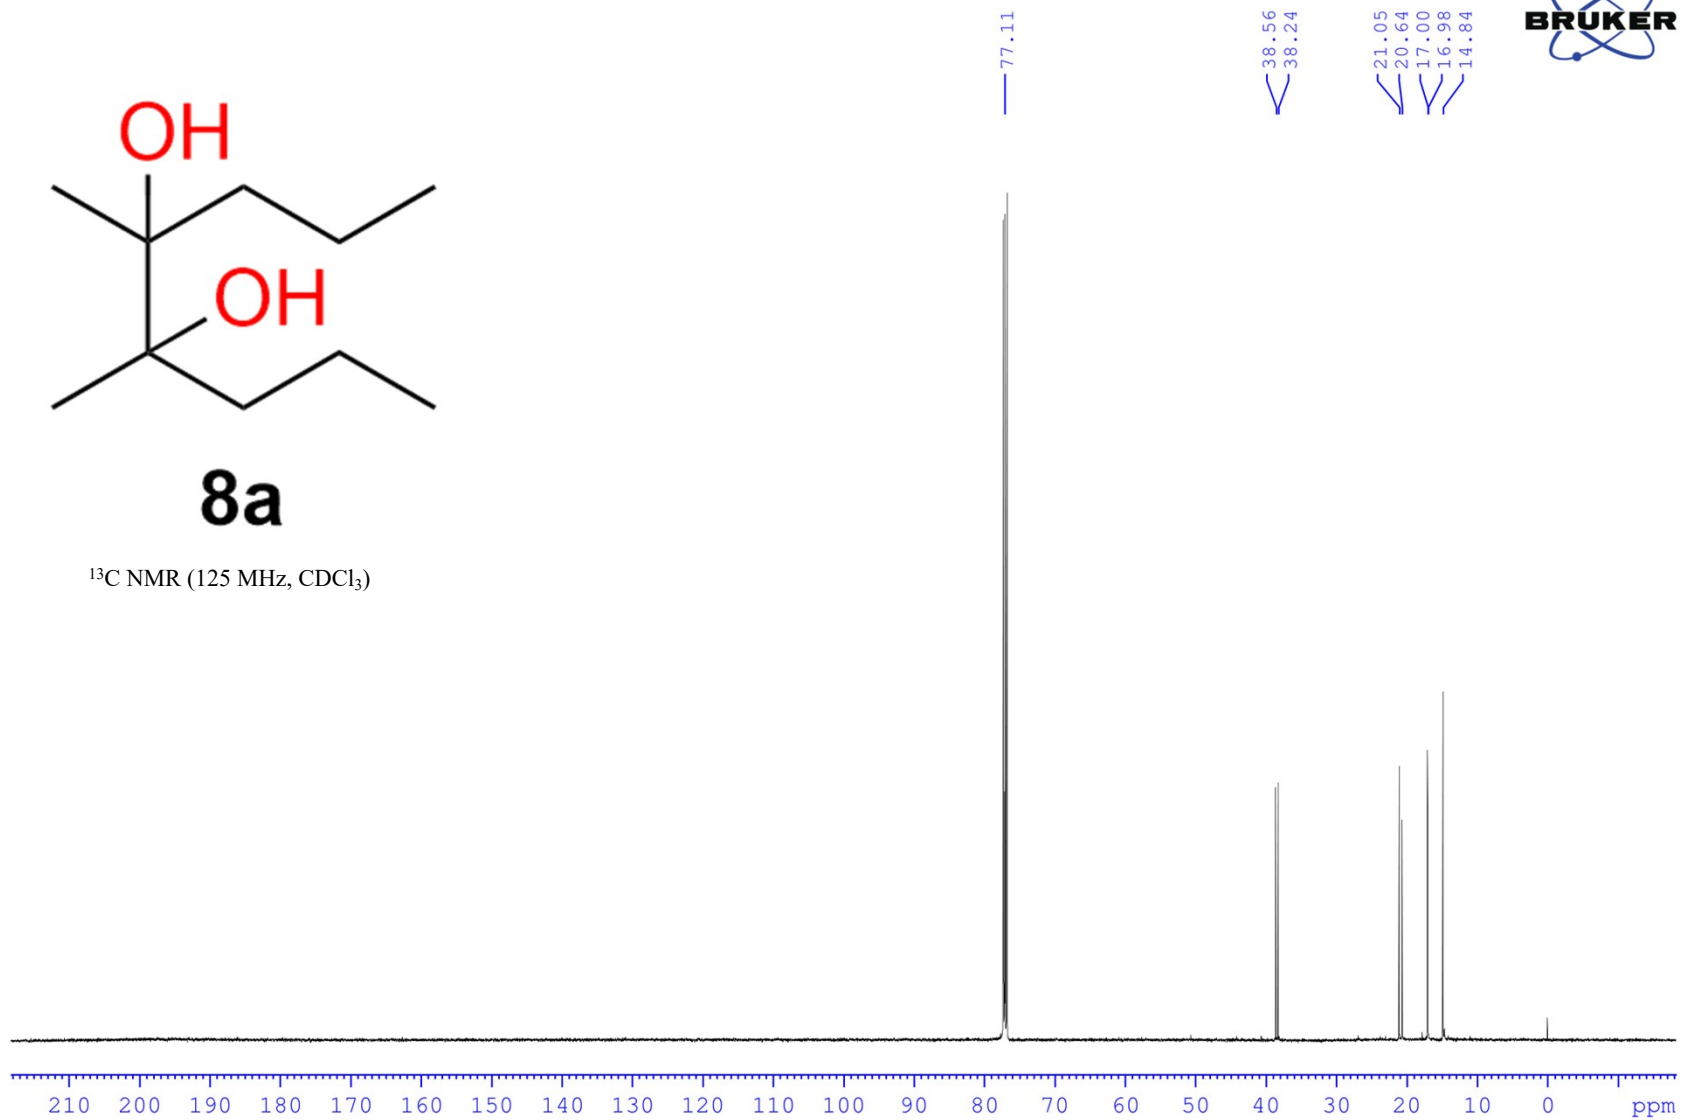

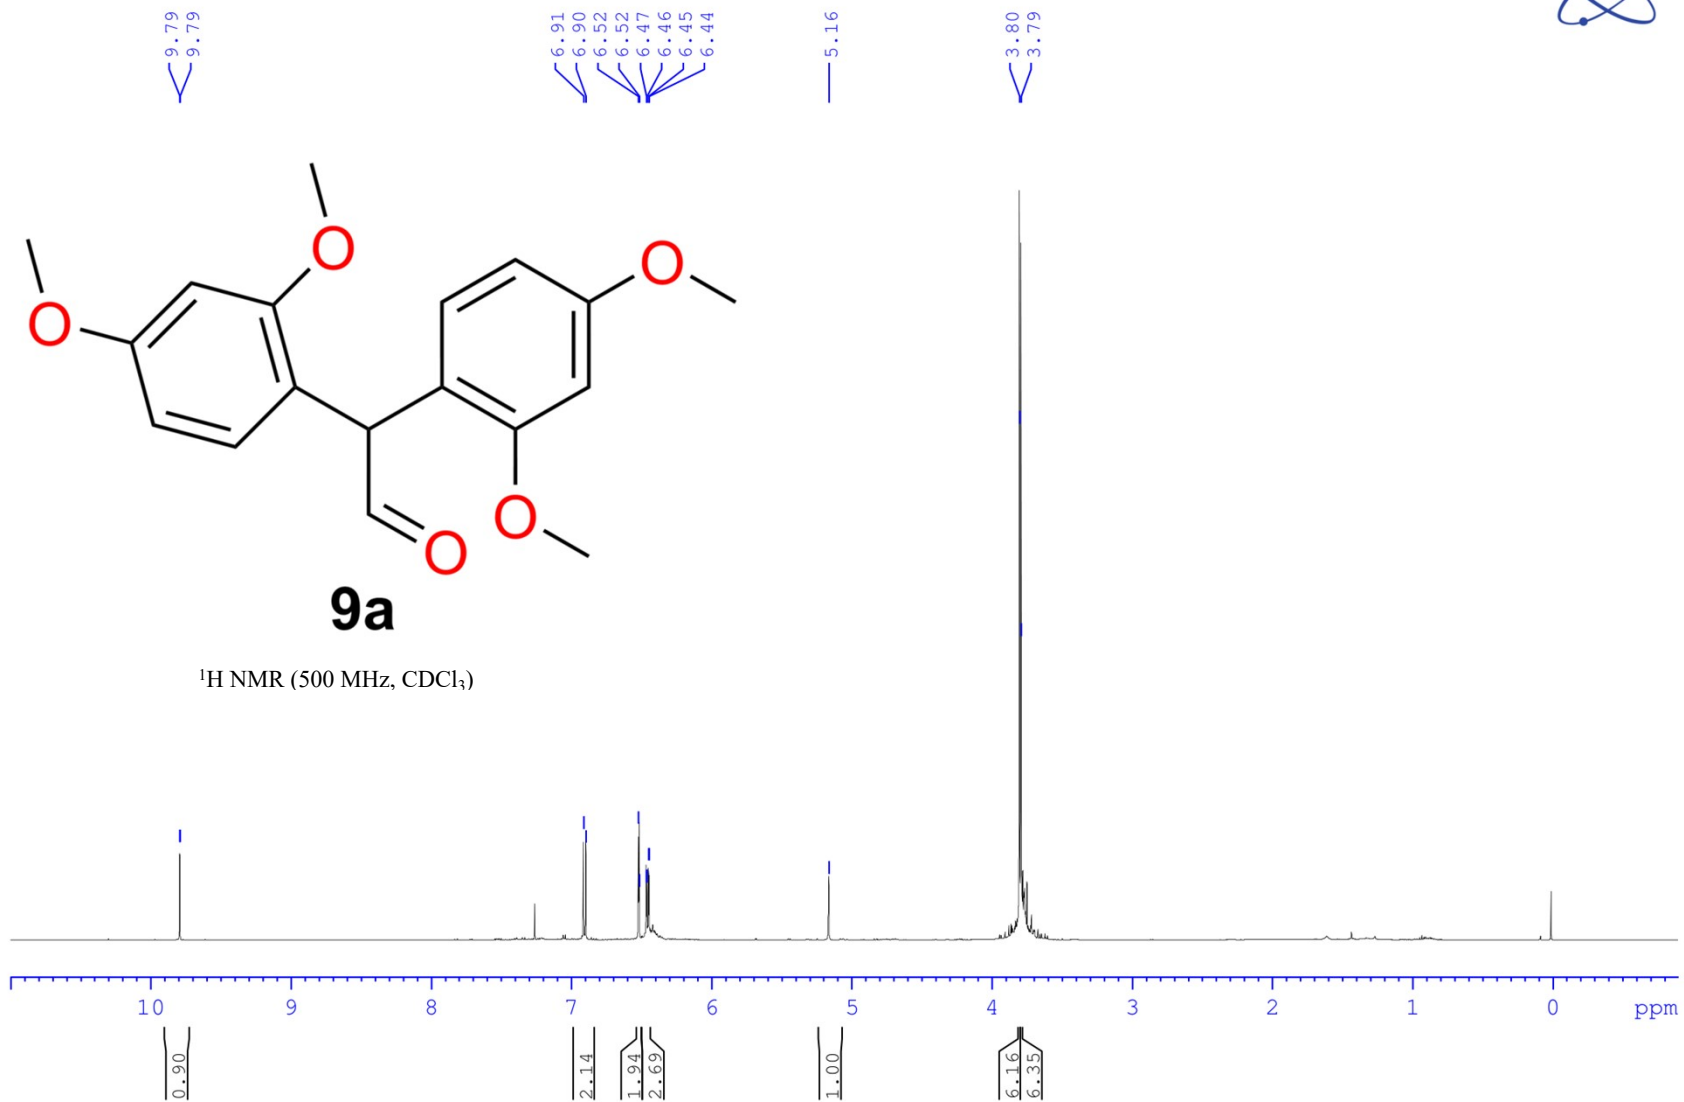

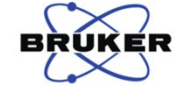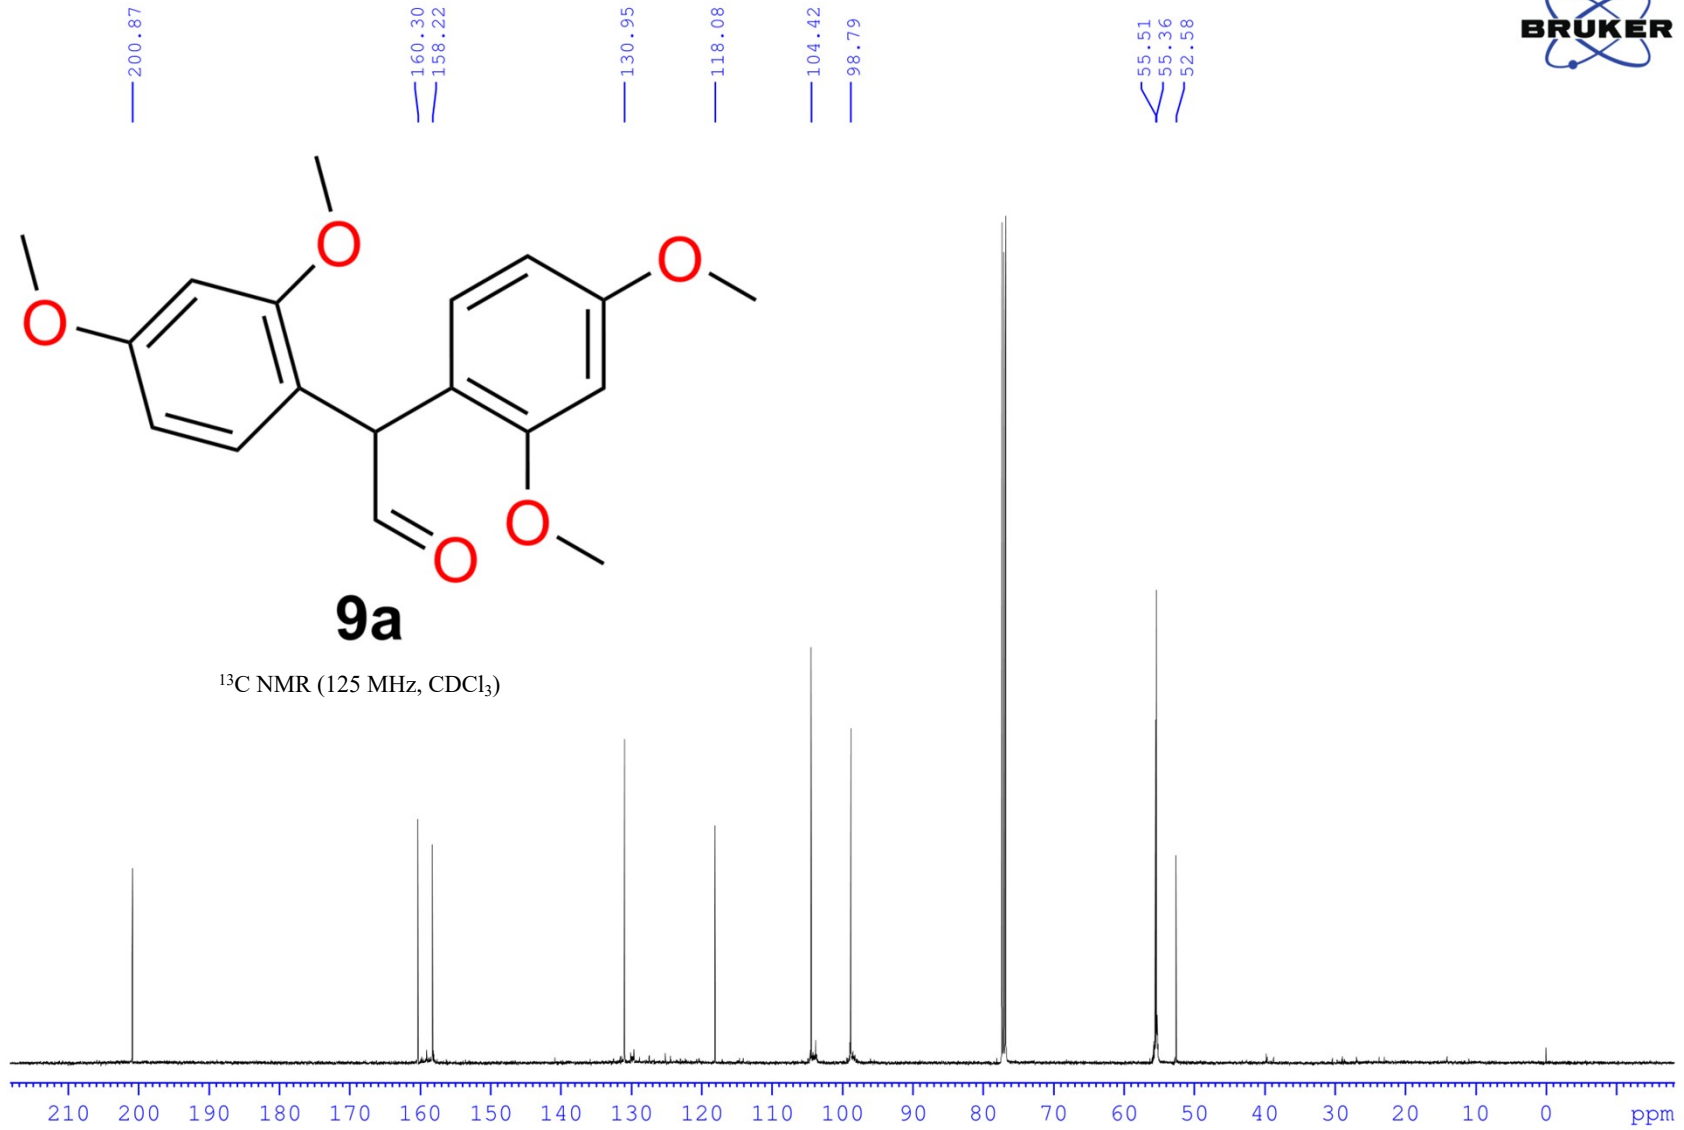

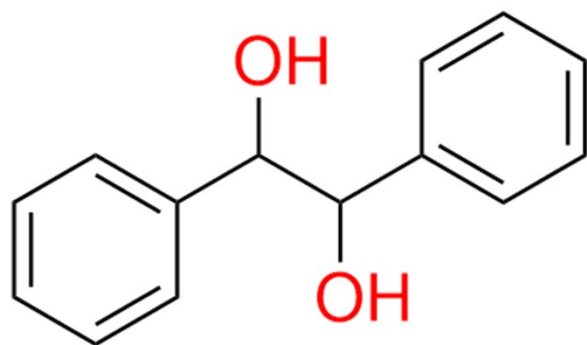

**10a**

<sup>1</sup>H NMR (500 MHz, CDCl<sub>3</sub>)

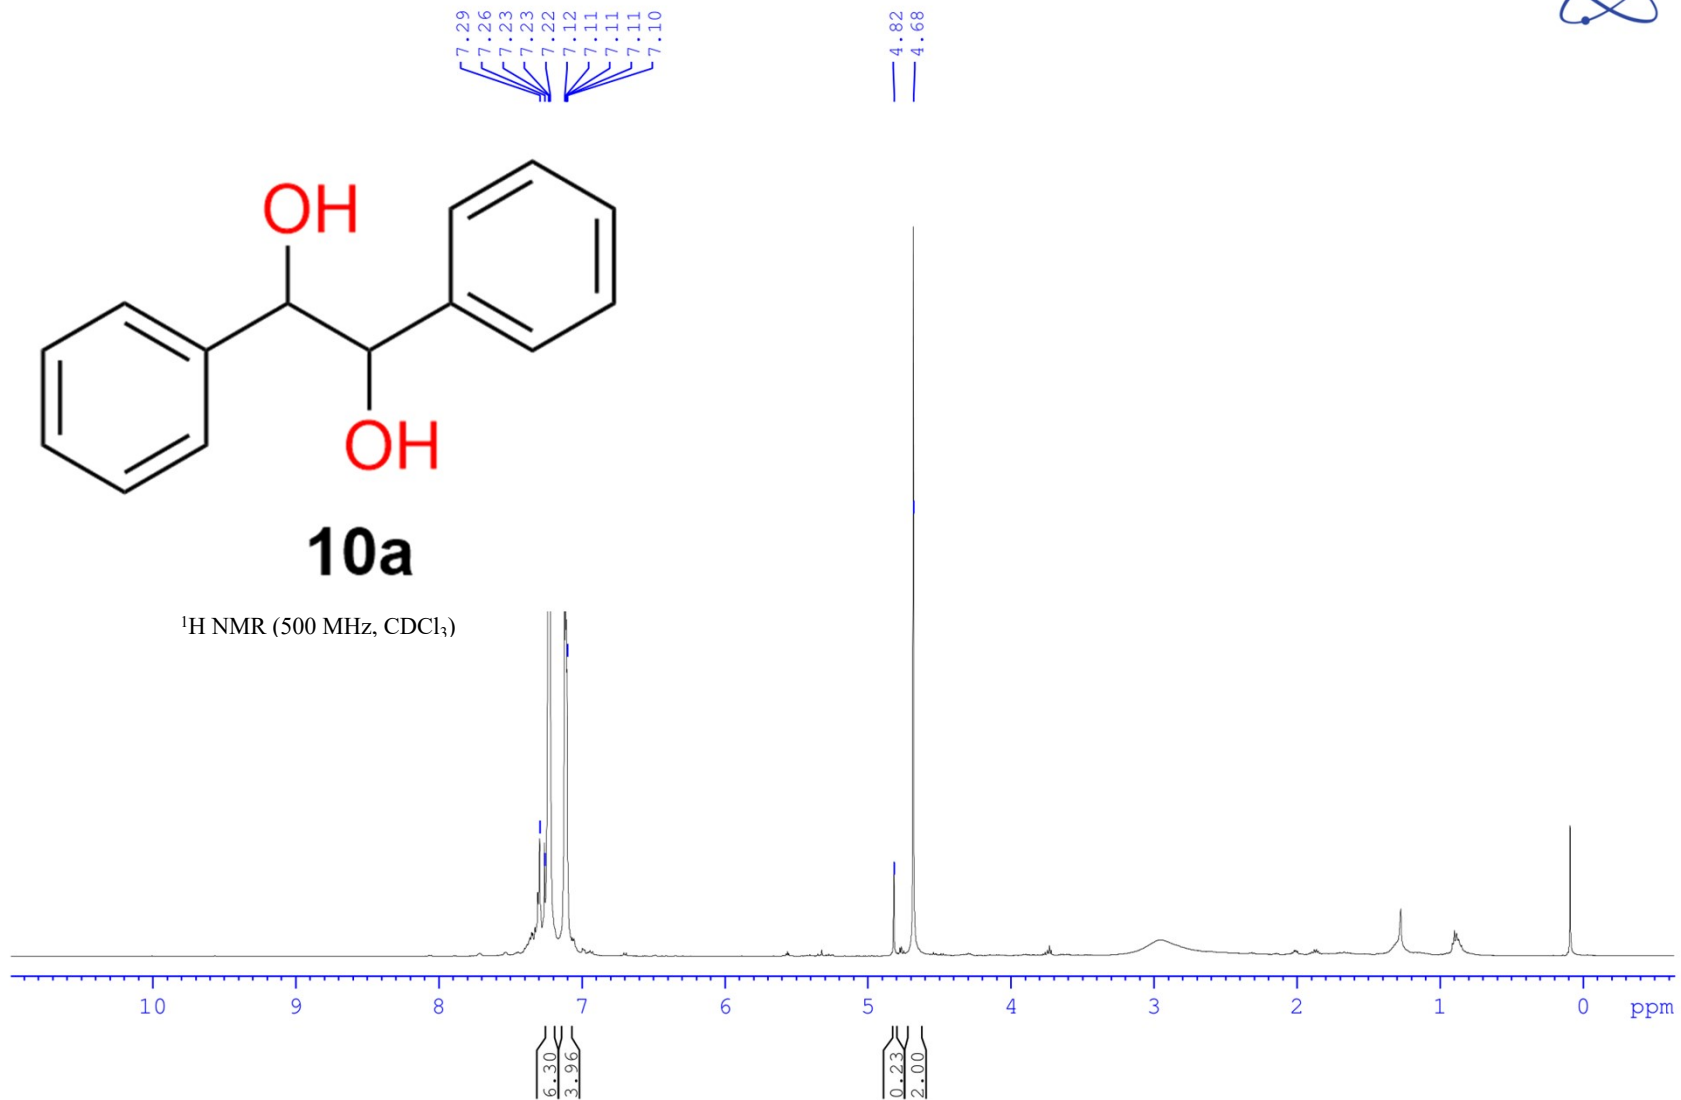



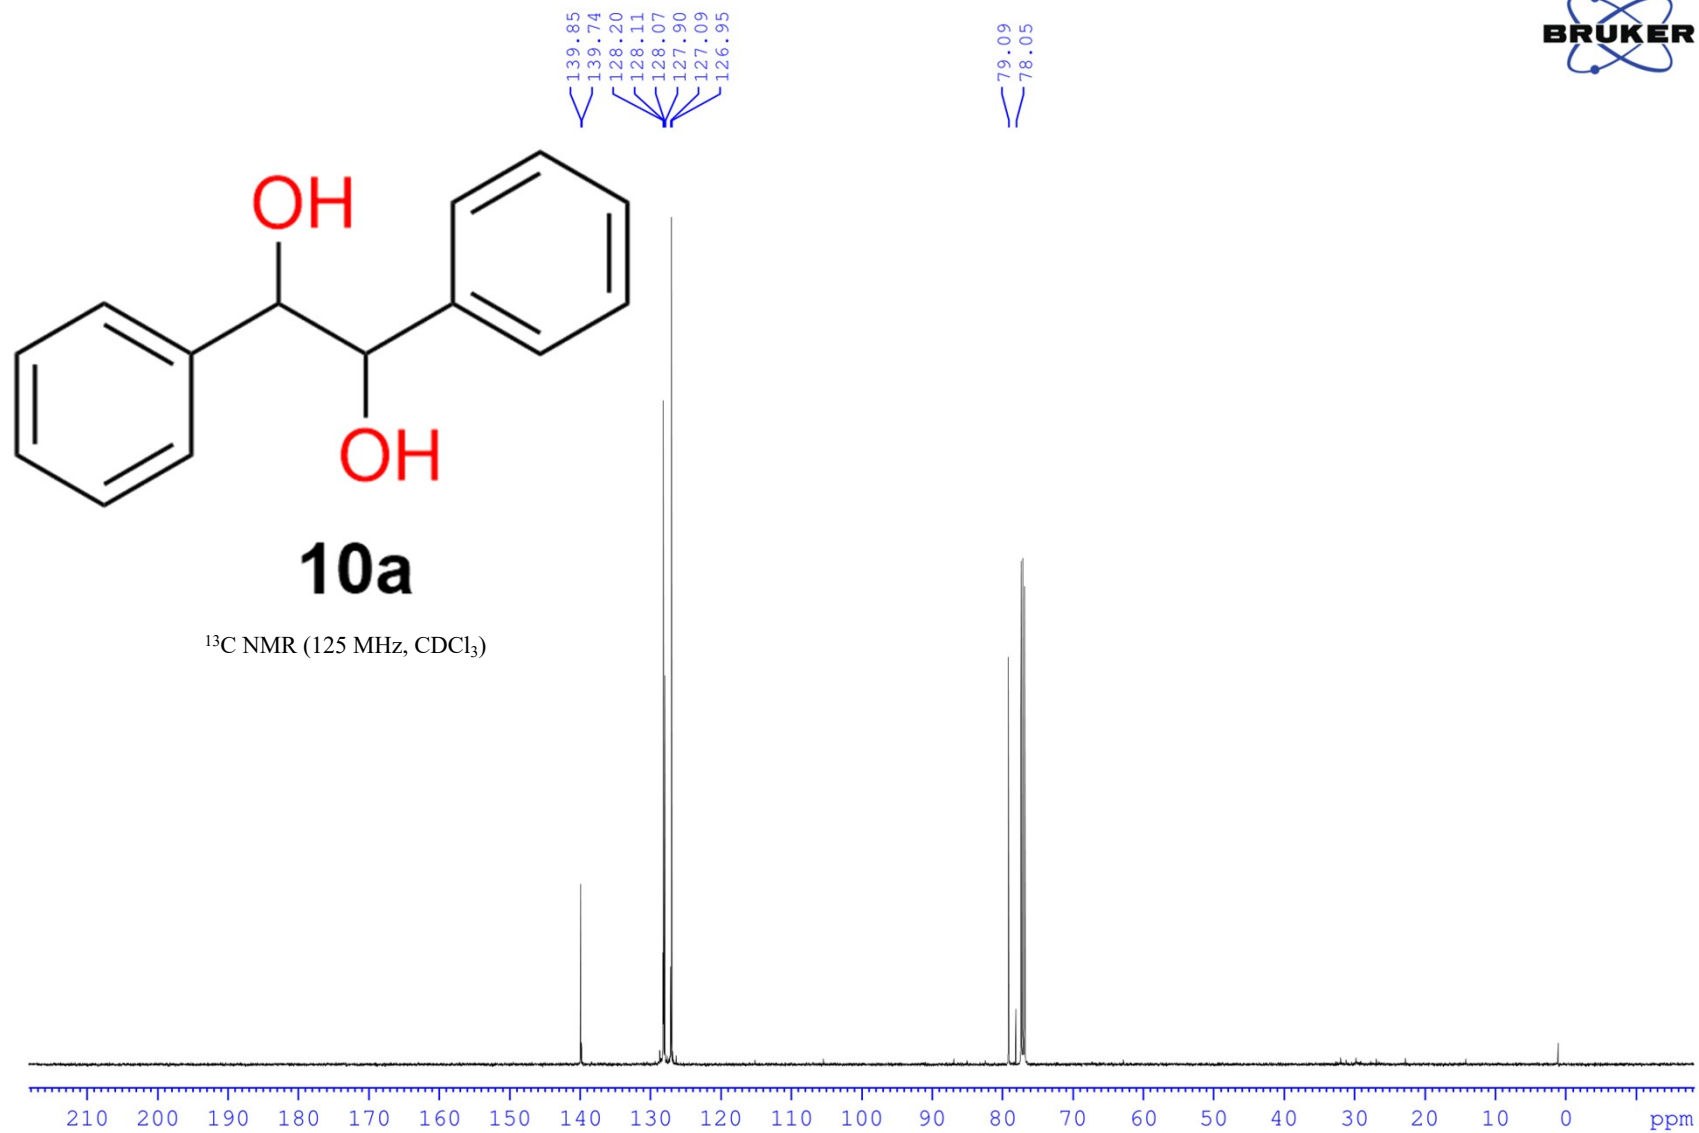

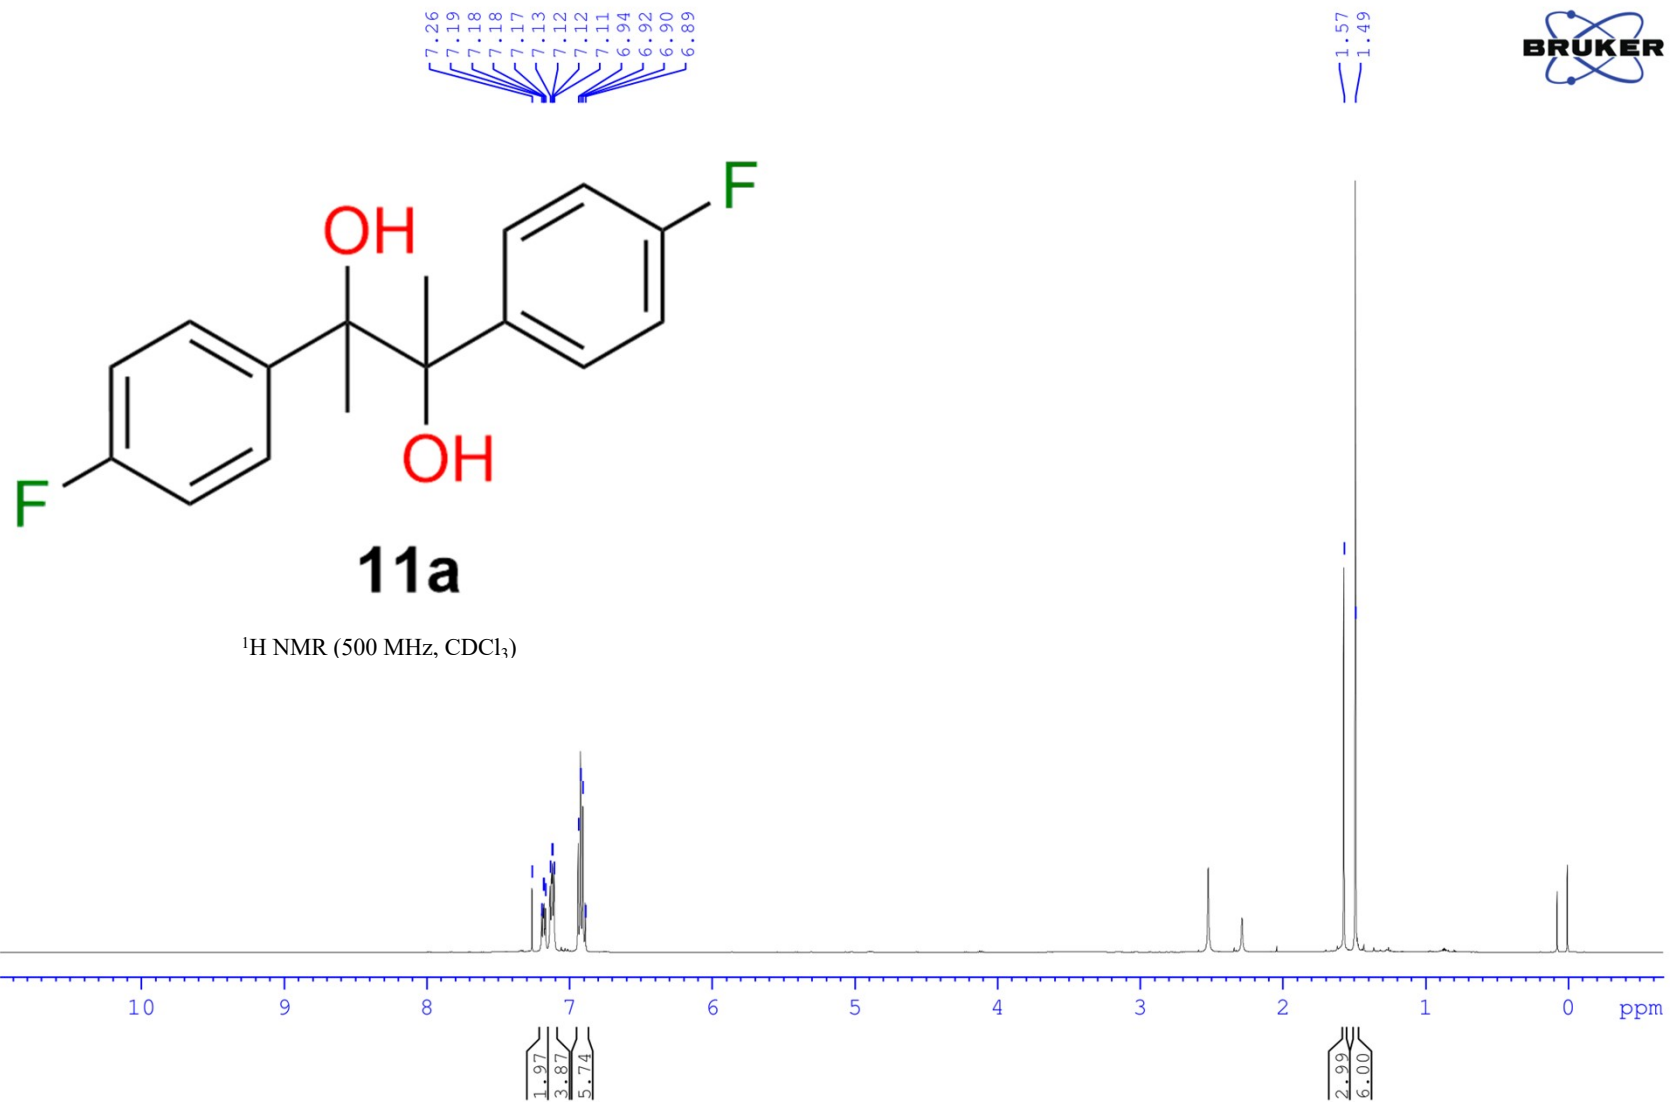

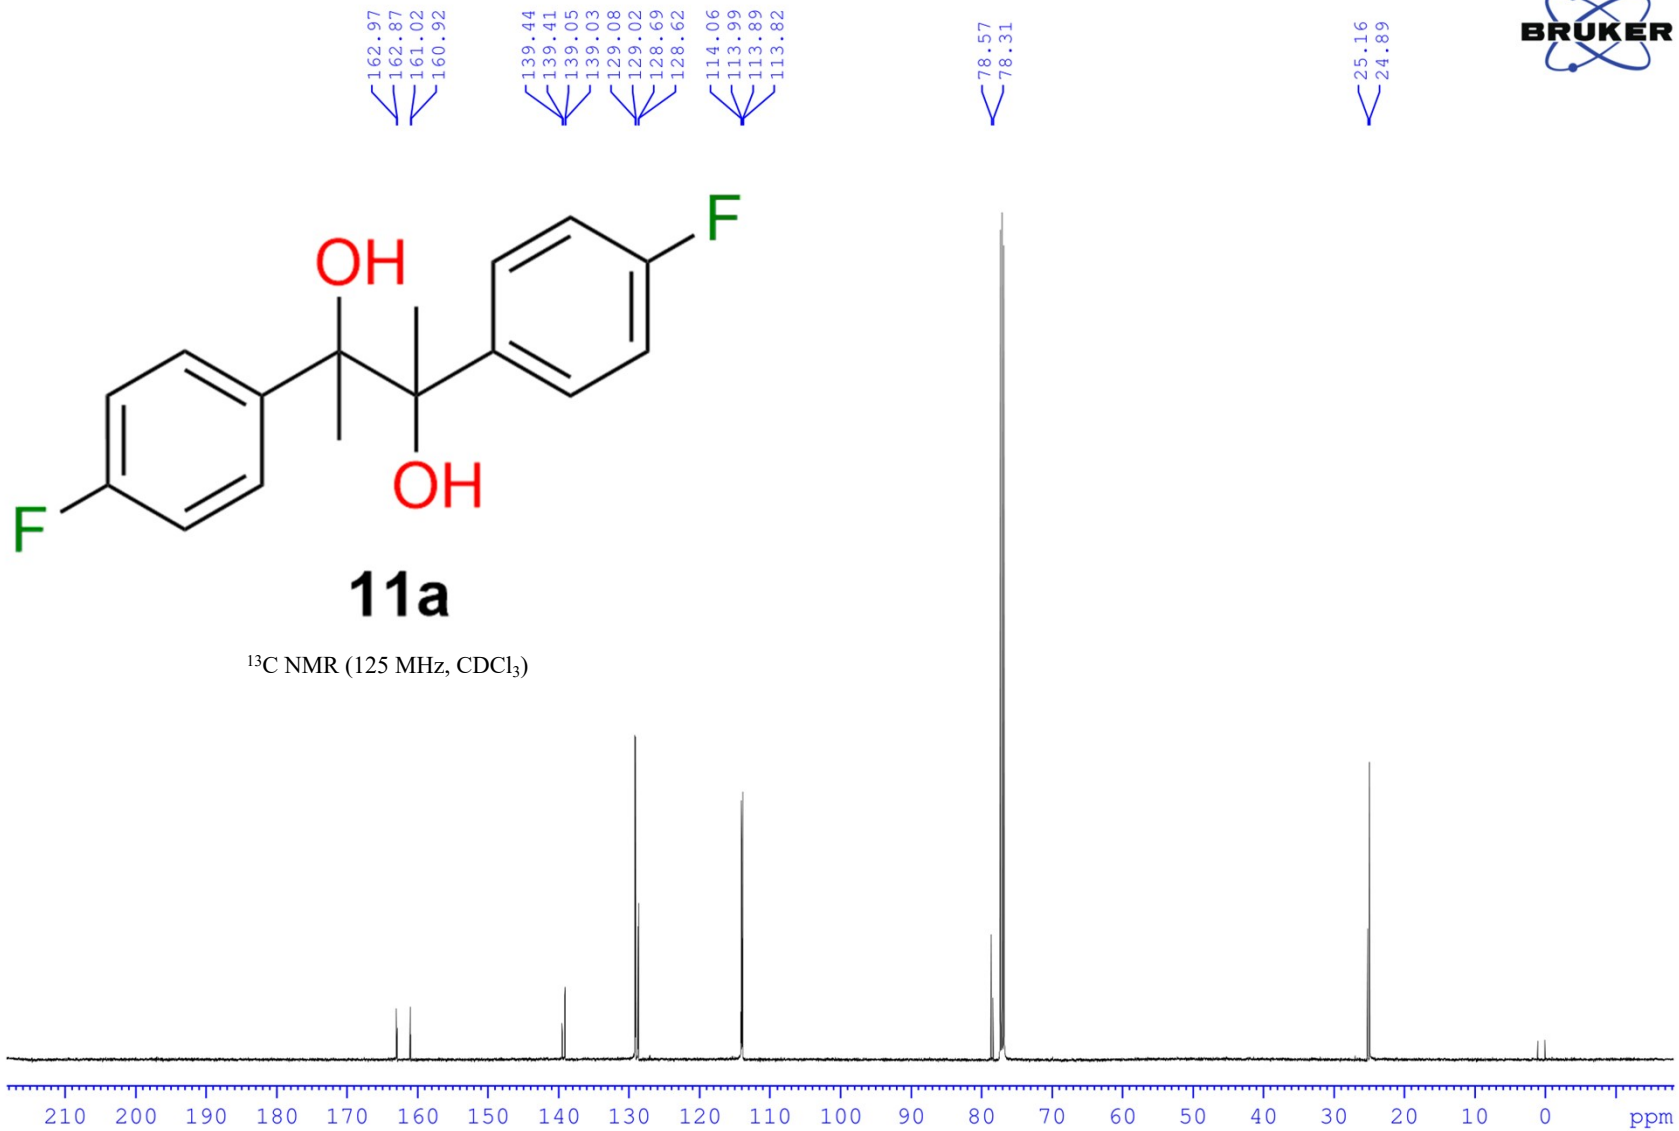

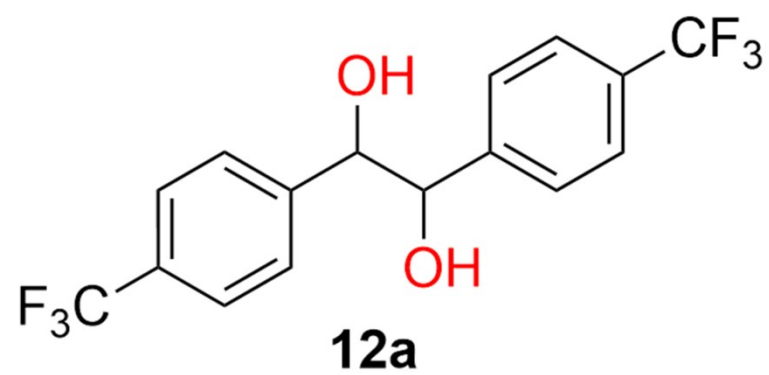

<sup>1</sup>H NMR (500 MHz, CDCl<sub>3</sub>)

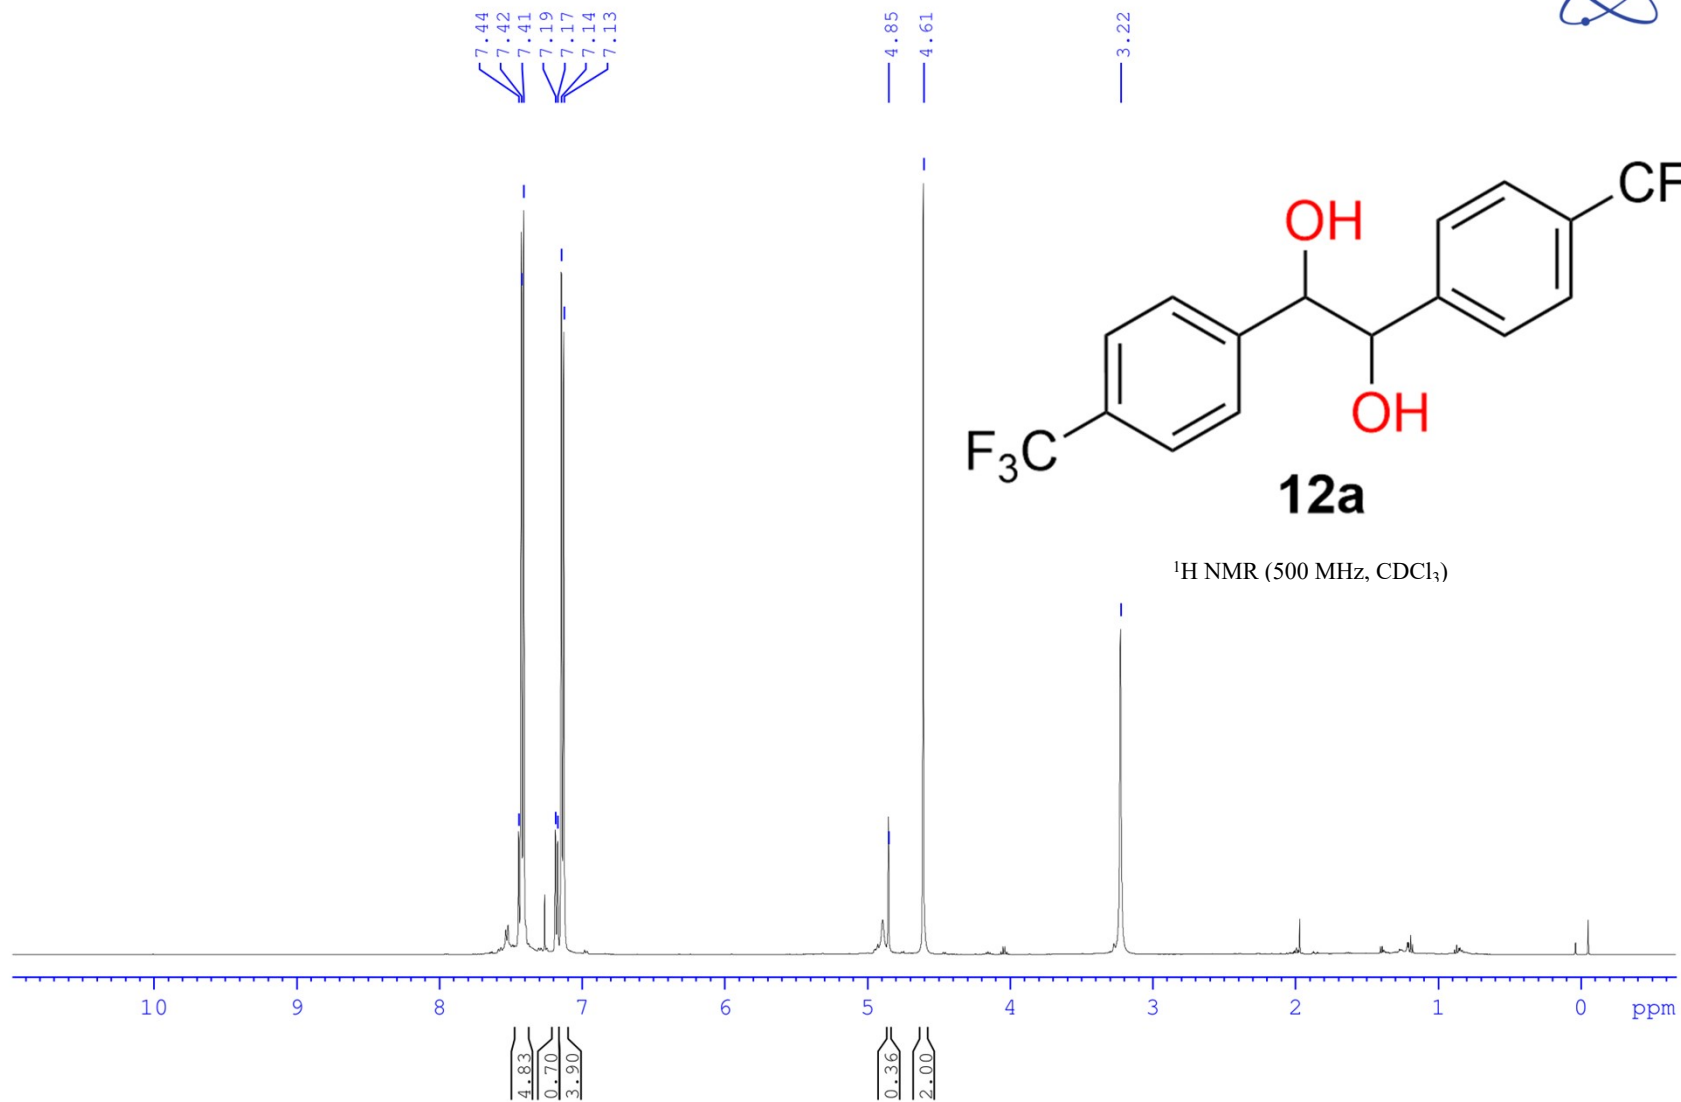

144.03  
143.87  
130.31  
130.09  
130.05  
129.83  
129.79  
129.58  
129.54  
129.32  
129.33  
127.27  
127.21  
125.14  
125.05  
124.87  
124.84  
124.65  
124.62  
122.98  
122.88  
120.82  
120.72

78.10  
76.85

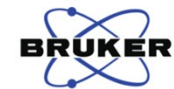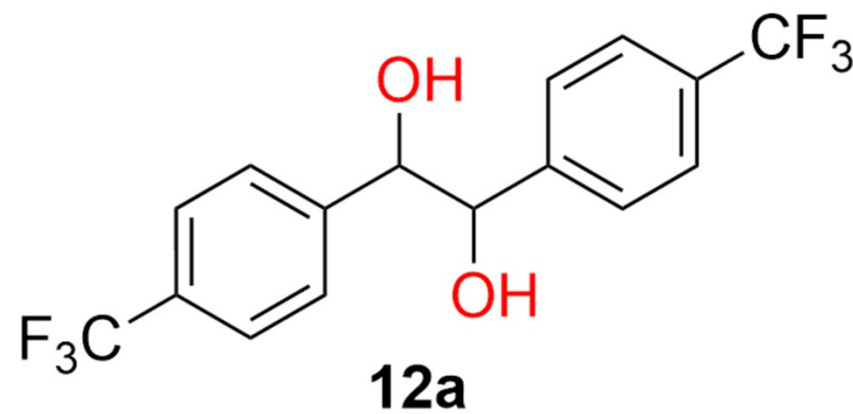

<sup>13</sup>C NMR (125 MHz, CDCl<sub>3</sub>)

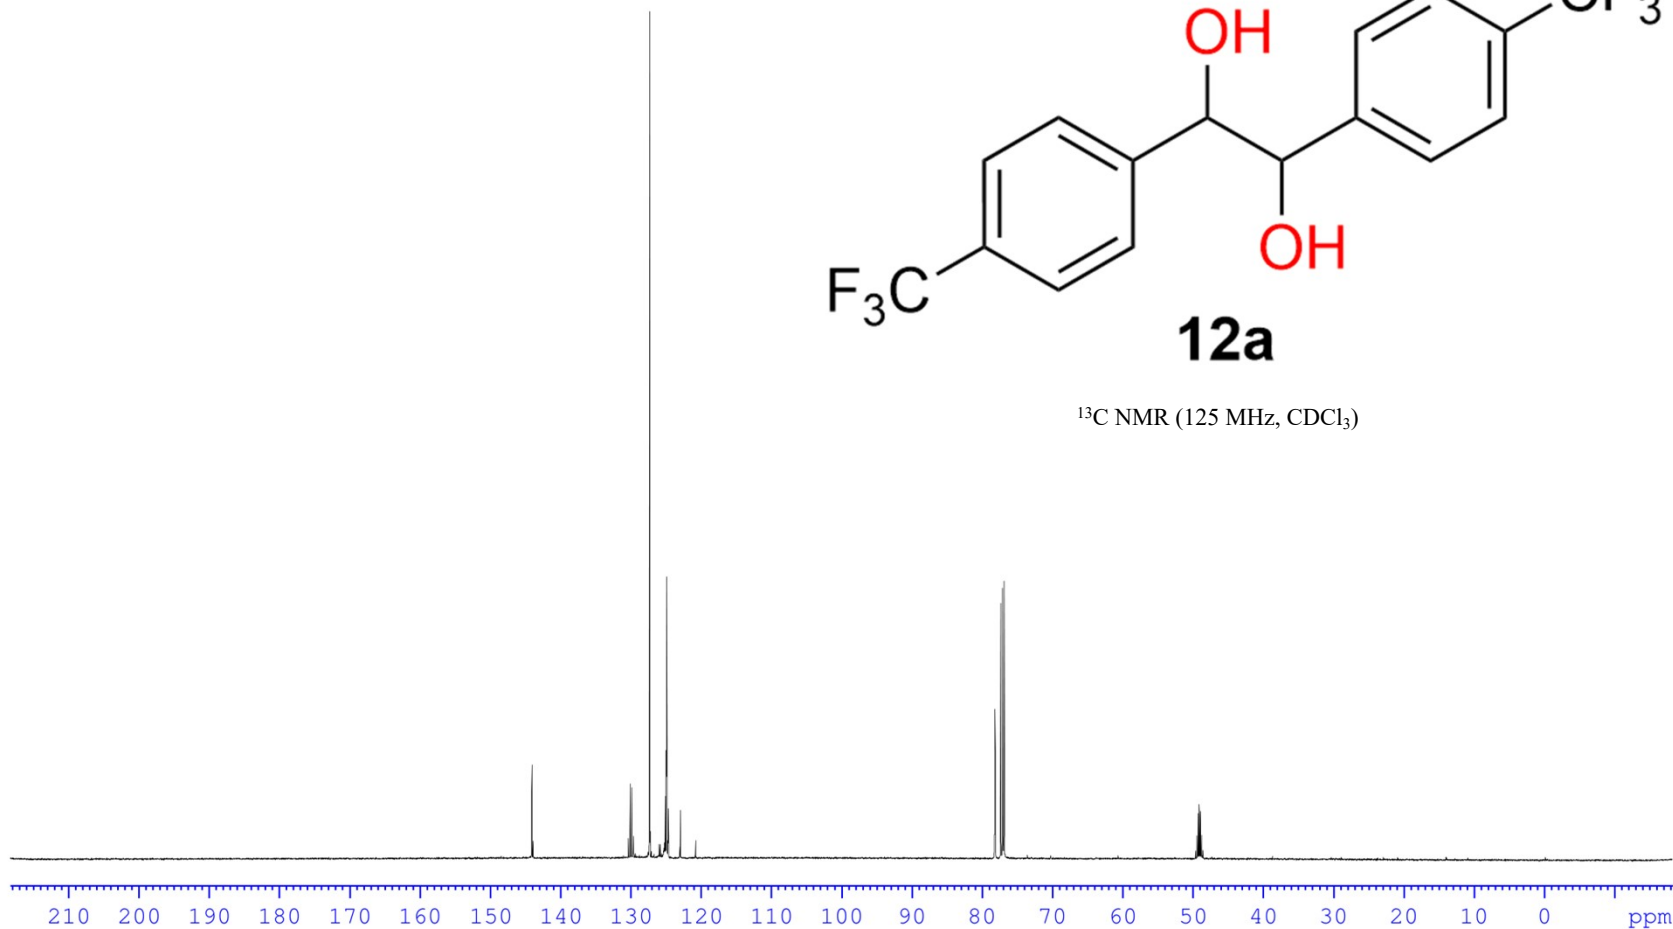

[S.12] HRMS spectra

Compound 1a

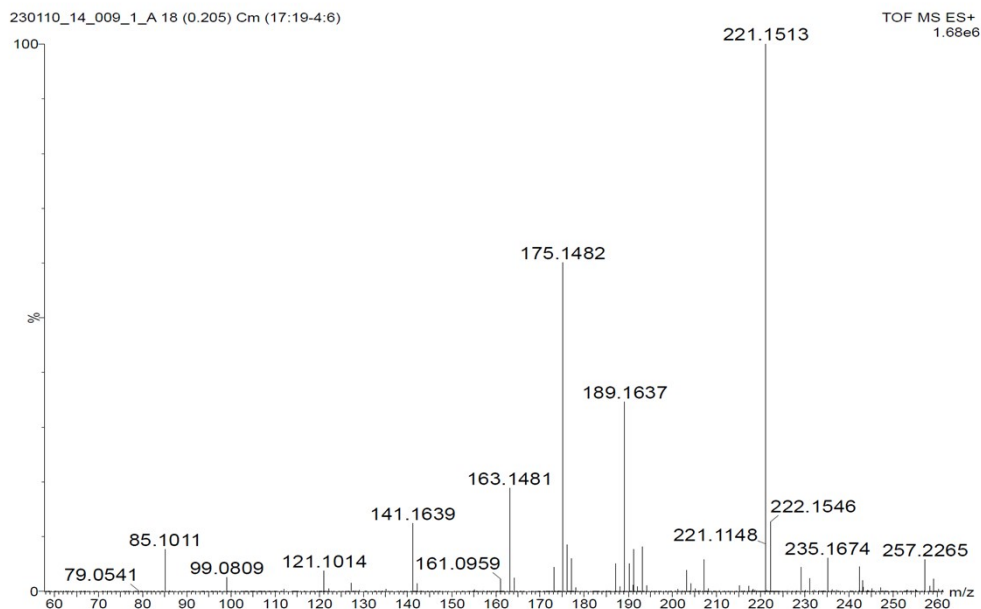

Elemental Composition Report

Page 1

Single Mass Analysis

Tolerance = 5.0 PPM / DBE: min = -1.5, max = 50.0

Element prediction: Off

Number of isotope peaks used for i-FIT = 9

Monoisotopic Mass, Even Electron Ions

38 formula(e) evaluated with 1 results within limits (all results (up to 1000) for each mass)

Elements Used:

C: 0-30 H: 0-25 O: 0-8 Na: 0-1

230110\_14\_009\_1\_A 18 (0.205) Cm (17:19-4:6)

TOF MS ES+ 1.68e+006

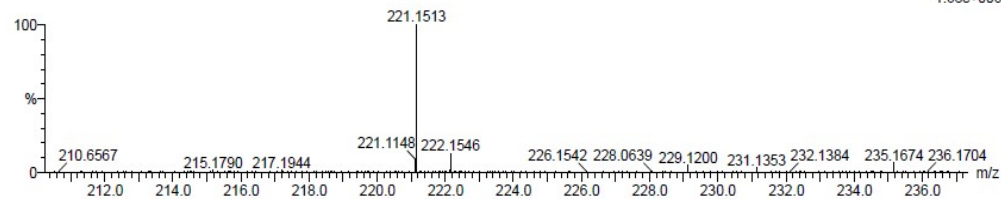

Minimum: -1.5  
Maximum: 5.0 5.0 50.0

| Mass     | Calc. Mass | mDa  | PPM  | DBE | i-FIT | Norm | Conf (%) | Formula       |
|----------|------------|------|------|-----|-------|------|----------|---------------|
| 221.1513 | 221.1517   | -0.4 | -1.8 | 1.5 | 507.1 | n/a  | n/a      | C12 H22 O2 Na |

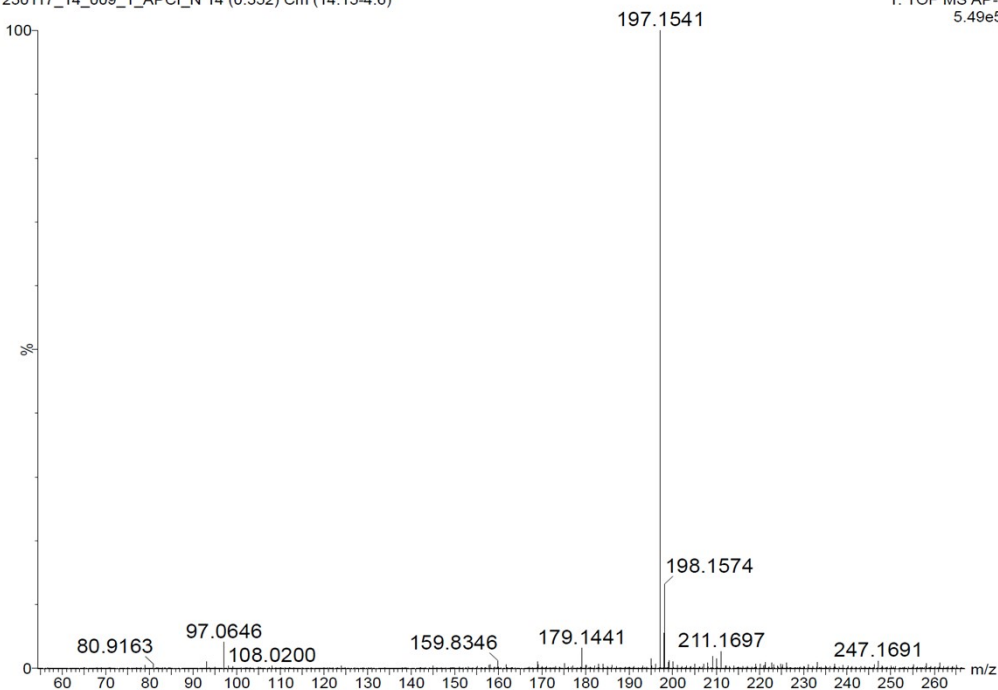

**Elemental Composition Report**

**Single Mass Analysis**

Tolerance = 5.0 PPM / DBE: min = -1.5, max = 50.0

Element prediction: Off

Number of isotope peaks used for i-FIT = 9

Monoisotopic Mass, Odd and Even Electron Ions

36 formula(e) evaluated with 1 results within limits (all results (up to 1000) for each mass)

Elements Used:

C: 0-30 H: 0-25 O: 0-8 Na: 0-1

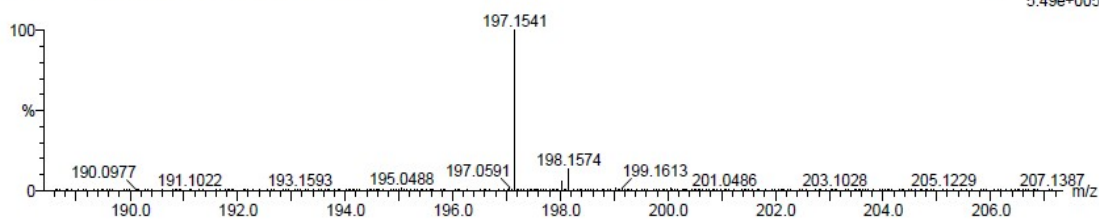

Minimum:

Maximum: 5.0 5.0 -1.5

5.0 5.0 50.0

| Mass     | Calc. Mass | mDa  | PPM  | DBE | i-FIT  | Norm | Conf(%) | Formula    |
|----------|------------|------|------|-----|--------|------|---------|------------|
| 197.1541 | 197.1542   | -0.1 | -0.5 | 2.5 | 1141.9 | n/a  | n/a     | C12 H21 O2 |

# Compound 2a

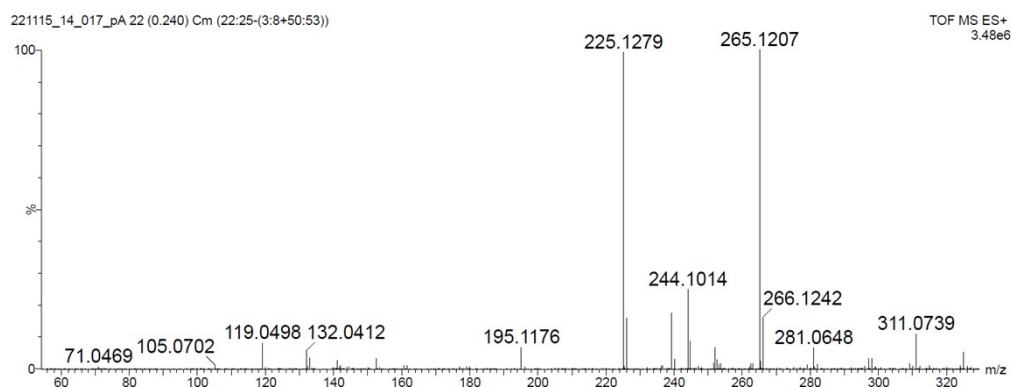

## Elemental Composition Report

Page 1

### Single Mass Analysis

Tolerance = 10.0 PPM / DBE: min = -1.5, max = 90.0

Element prediction: Off

Number of isotope peaks used for i-FIT = 9

Monoisotopic Mass, Even Electron Ions

28 formula(e) evaluated with 1 results within limits (all results (up to 1000) for each mass)

Elements Used:

C: 0-17 H: 0-20 O: 0-10 Na: 0-1

221115\_14\_017\_pA 22 (0.240) Cm (22:25-(3:8+50:53))

TOF MS ES+  
3.48e+006

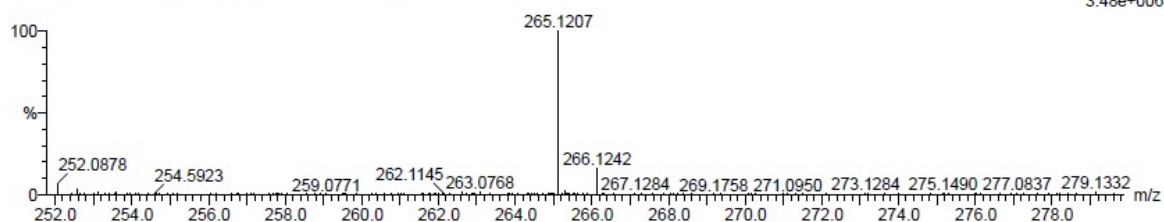

Minimum: -1.5  
Maximum: 5.0 10.0 90.0

| Mass     | Calc. Mass | mDa | PPM | DBE | i-FIT | Norm | Conf (%) | Formula       |
|----------|------------|-----|-----|-----|-------|------|----------|---------------|
| 265.1207 | 265.1204   | 0.3 | 1.1 | 7.5 | 403.9 | n/a  | n/a      | C16 H18 O2 Na |



# Compound 3a

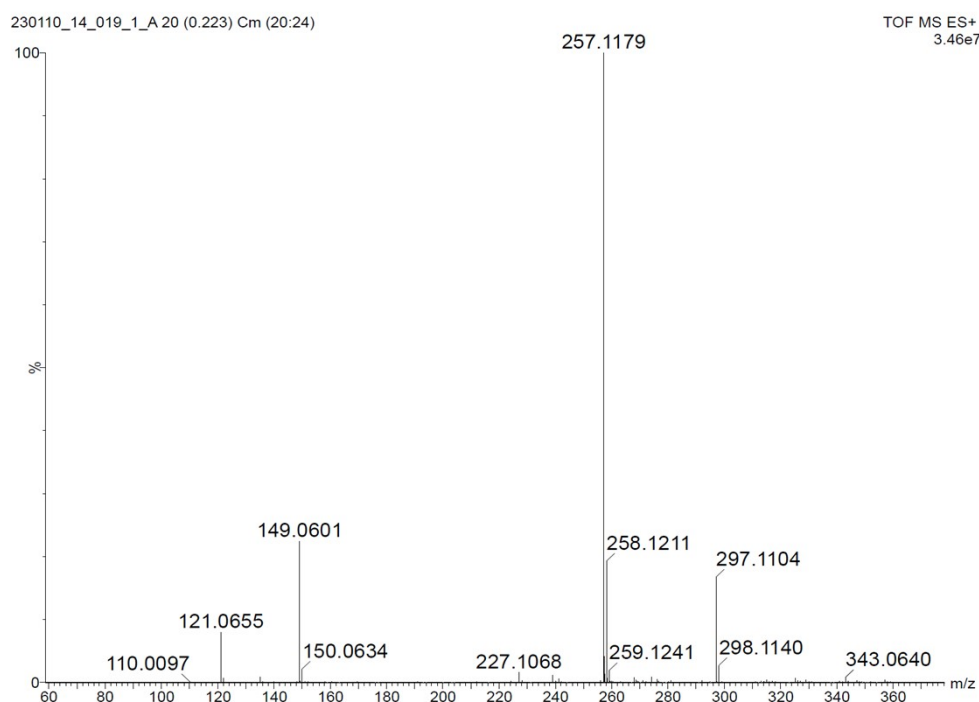

## Elemental Composition Report

Page 1

### Single Mass Analysis

Tolerance = 5.0 PPM / DBE: min = -1.5, max = 50.0

Element prediction: Off

Number of isotope peaks used for i-FIT = 9

Monoisotopic Mass, Even Electron Ions

39 formula(e) evaluated with 1 results within limits (all results (up to 1000) for each mass)

Elements Used:

C: 0-30 H: 0-25 O: 0-8 Na: 0-1

230110\_14\_019\_1\_A 20 (0.223) Cm (20:24)

TOF MS ES+  
5.77e+006

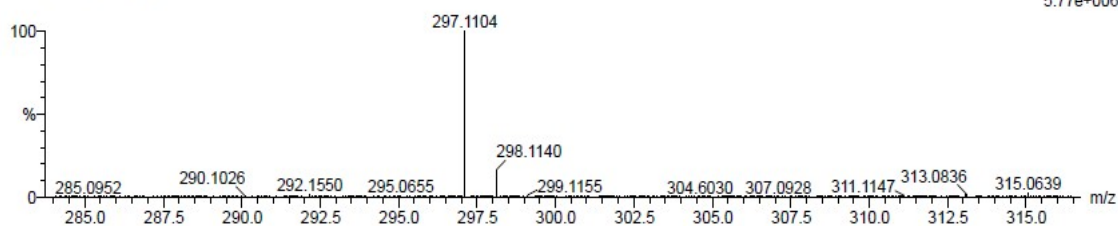

Minimum: -1.5  
Maximum: 5.0 5.0 50.0

| Mass     | Calc. Mass | mDa | PPM | DBE | i-FIT  | Norm | Conf(%) | Formula       |
|----------|------------|-----|-----|-----|--------|------|---------|---------------|
| 297.1104 | 297.1103   | 0.1 | 0.3 | 7.5 | 1241.0 | n/a  | n/a     | C16 H18 O4 Na |

# Compound 4a

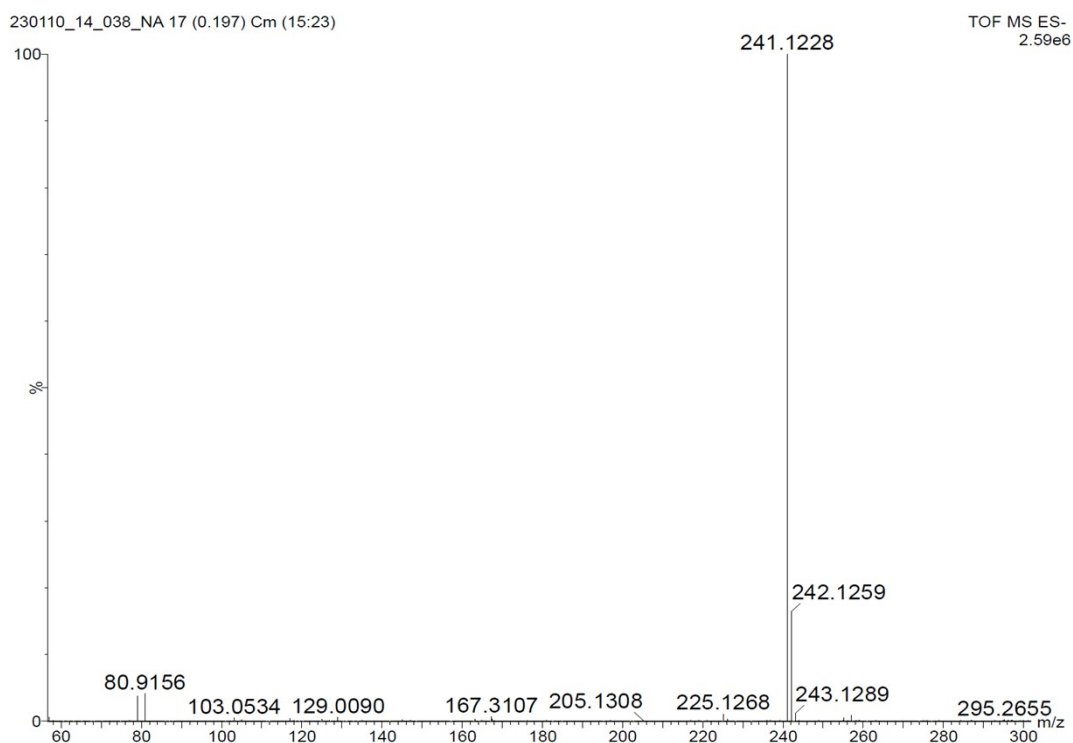

## Elemental Composition Report

Page 1

### Single Mass Analysis

Tolerance = 5.0 PPM / DBE: min = -1.5, max = 50.0

Element prediction: Off

Number of isotope peaks used for i-FIT = 9

Monoisotopic Mass, Even Electron Ions

39 formula(e) evaluated with 1 results within limits (all results (up to 1000) for each mass)

Elements Used:

C: 0-30 H: 0-25 O: 0-8 Na: 0-1

230110\_14\_038\_NA 17 (0.197) Cm (15:23)

TOF MS ES-  
2.59e+006

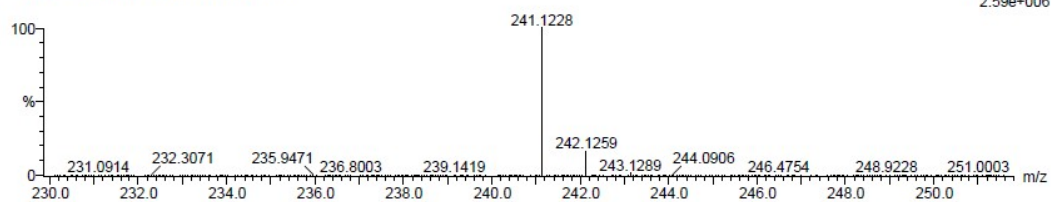

Minimum: -1.5  
Maximum: 5.0 5.0 -1.5 50.0

| Mass     | Calc. Mass | mDa  | PPM  | DBE | i-FIT  | Norm | Conf (%) | Formula    |
|----------|------------|------|------|-----|--------|------|----------|------------|
| 241.1228 | 241.1229   | -0.1 | -0.4 | 8.5 | 1197.9 | n/a  | n/a      | C16 H17 O2 |

# Compound 5a

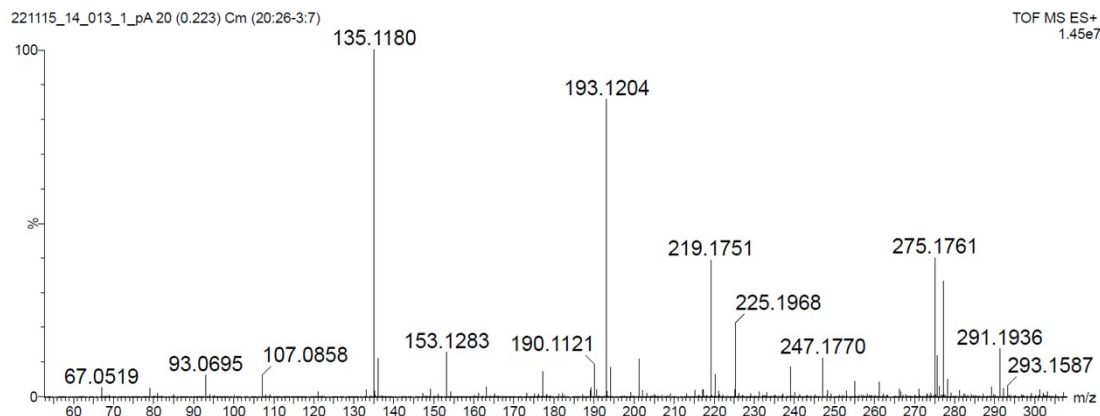

## Elemental Composition Report

Page 1

### Single Mass Analysis

Tolerance = 10.0 PPM / DBE: min = -1.5, max = 90.0

Element prediction: Off

Number of isotope peaks used for i-FIT = 9

Monoisotopic Mass, Even Electron Ions

34 formula(e) evaluated with 1 results within limits (all results (up to 1000) for each mass)

Elements Used:

C: 0-17 H: 0-20 O: 0-10 Na: 0-1

221115\_14\_013\_1\_pA 20 (0.223) Cm (20:26-3:7)

TOF MS ES+  
1.24e+007

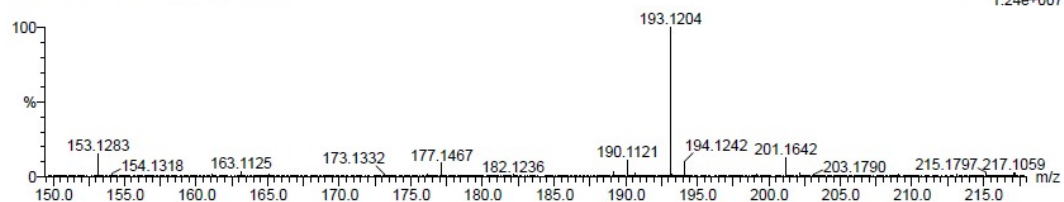

Minimum: -1.5  
Maximum: 5.0 10.0 90.0

| Mass     | Calc. Mass | mDa | PPM | DBE | i-FIT  | Norm | Conf (%) | Formula       |
|----------|------------|-----|-----|-----|--------|------|----------|---------------|
| 193.1204 | 193.1204   | 0.0 | 0.0 | 1.5 | 1538.8 | n/a  | n/a      | C10 H18 O2 Na |

# Compound 6a

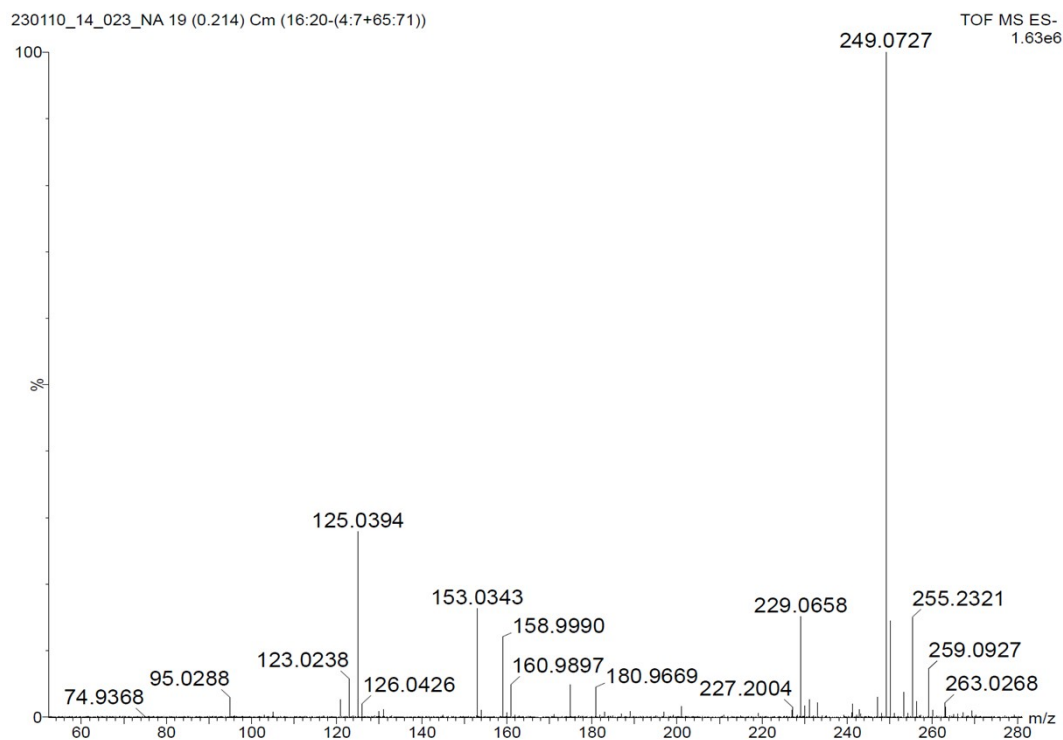

## Elemental Composition Report

Page 1

### Single Mass Analysis

Tolerance = 5.0 PPM / DBE: min = -1.5, max = 50.0

Element prediction: Off

Number of isotope peaks used for i-FIT = 9

Monoisotopic Mass, Even Electron Ions

116 formula(e) evaluated with 3 results within limits (all results (up to 1000) for each mass)

Elements Used:

C: 0-30 H: 0-25 O: 0-8 Na: 0-1 F: 0-2

230110\_14\_023\_NA 19 (0.214) Cm (16:20-(4:7+65:71))

TOF MS ES-  
1.63e+006

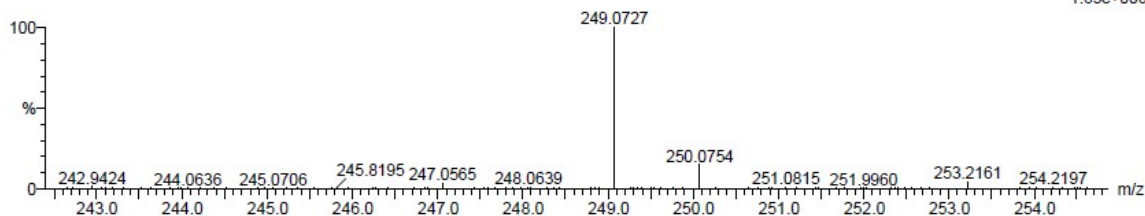

Minimum: -1.5  
Maximum: 5.0 5.0 50.0

| Mass     | Calc. Mass | mDa | PPM | DBE | i-FIT | Norm  | Conf (%) | Formula       |
|----------|------------|-----|-----|-----|-------|-------|----------|---------------|
| 249.0727 | 249.0727   | 0.0 | 0.0 | 8.5 | 439.9 | 0.048 | 95.34    | C14 H11 O2 F2 |

# Compound 7a

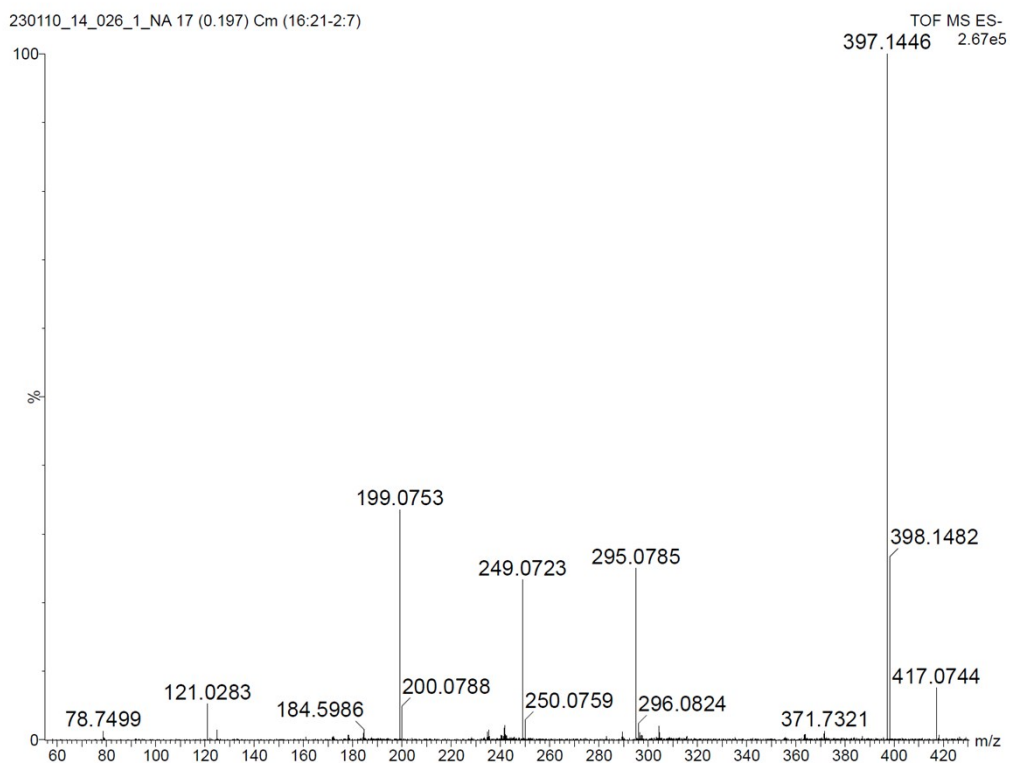

## Elemental Composition Report

Page 1

### Single Mass Analysis

Tolerance = 5.0 PPM / DBE: min = -1.5, max = 50.0

Element prediction: Off

Number of isotope peaks used for i-FIT = 9

Monoisotopic Mass, Even Electron Ions

34 formula(e) evaluated with 1 results within limits (all results (up to 1000) for each mass)

Elements Used:

C: 0-30 H: 0-25 O: 0-8 Na: 0-1

230110\_14\_026\_1\_NA 17 (0.197) Cm (16:21-2:7)

TOF MS ES-  
2.67e+005

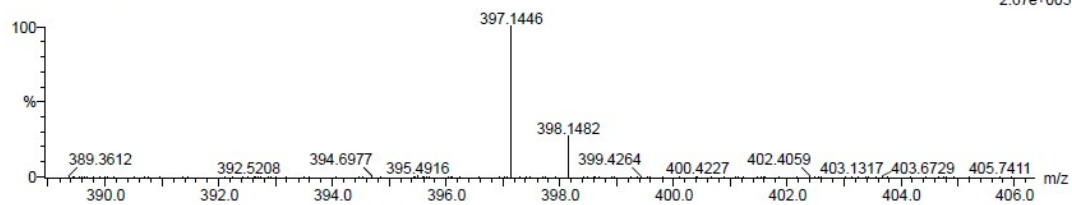

| Minimum: |            |     |     | -1.5 |       |      |          |            |
|----------|------------|-----|-----|------|-------|------|----------|------------|
| Maximum: | 5.0        | 5.0 |     | 50.0 |       |      |          |            |
| Mass     | Calc. Mass | mDa | PPM | DBE  | i-FIT | Norm | Conf (%) | Formula    |
| 397.1446 | 397.1440   | 0.6 | 1.5 | 16.5 | 441.8 | n/a  | n/a      | C26 H21 O4 |

# Compound 8a

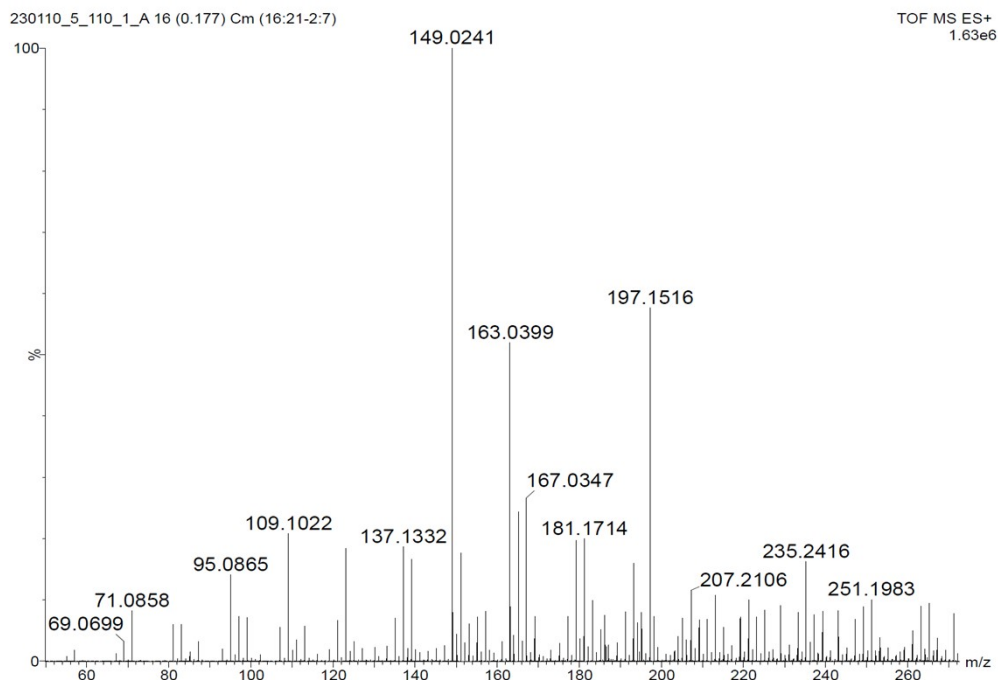

## Elemental Composition Report

Page 1

### Single Mass Analysis

Tolerance = 5.0 PPM / DBE: min = -1.5, max = 50.0

Element prediction: Off

Number of isotope peaks used for i-FIT = 9

Monoisotopic Mass, Even Electron Ions

36 formula(e) evaluated with 1 results within limits (all results (up to 1000) for each mass)

Elements Used:

C: 0-30 H: 0-25 O: 0-8 Na: 0-1

230110\_5\_110\_1\_A 16 (0.177) Cm (16:21-2:7)

TOF MS ES+  
9.40e+005

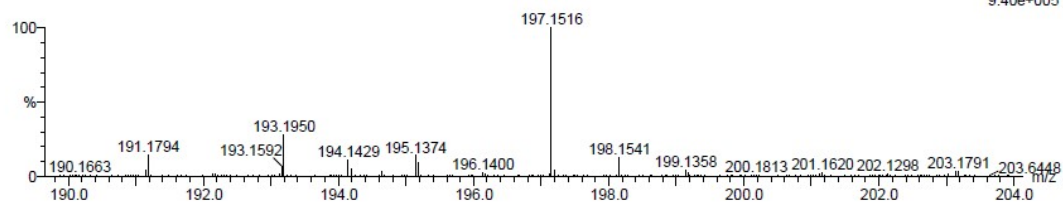

Minimum:

Maximum: 5.0 5.0 -1.5

Mass Calc. Mass mDa PPM DBE i-FIT Norm Conf(†) Formula

197.1516 197.1517 -0.1 -0.5 -0.5 928.4 n/a n/a C10 H22 O2 Na

# Compound 10a

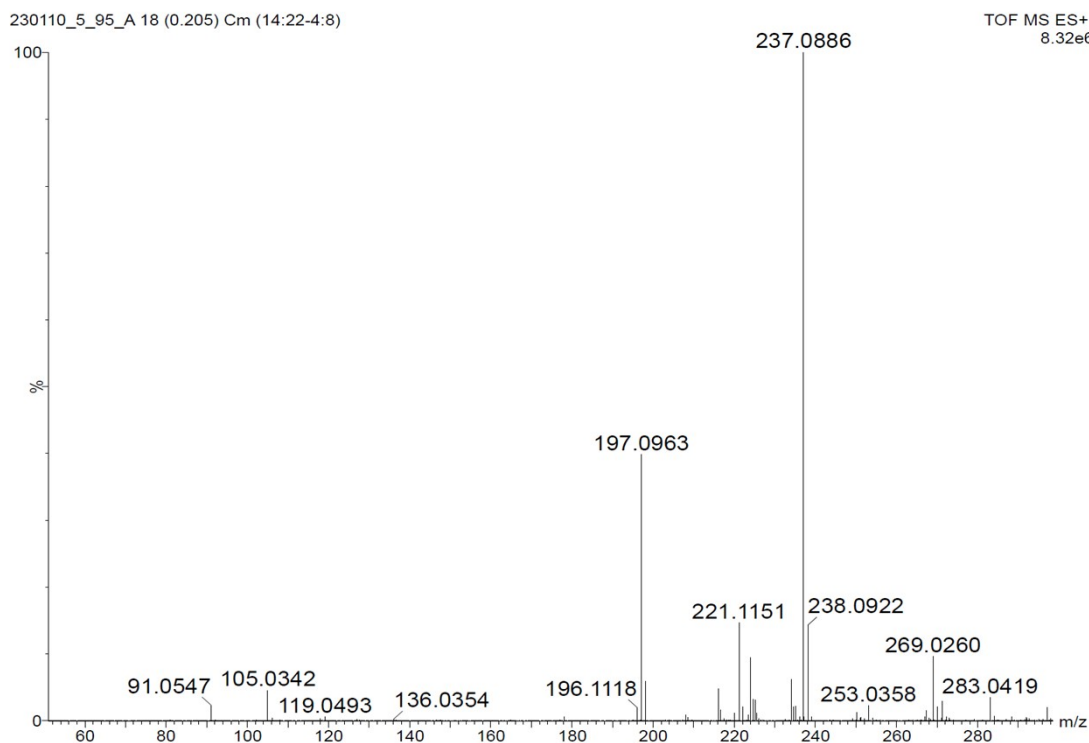

## Elemental Composition Report

Page 1

### Single Mass Analysis

Tolerance = 5.0 PPM / DBE: min = -1.5, max = 50.0

Element prediction: Off

Number of isotope peaks used for i-FIT = 9

Monoisotopic Mass, Even Electron Ions

30 formula(e) evaluated with 1 results within limits (all results (up to 1000) for each mass)

Elements Used:

C: 0-20 H: 0-20 O: 0-8 Na: 0-1

230110\_5\_95\_A 18 (0.205) Cm (14:22-4:8)

TOF MS ES+  
8.32e+006

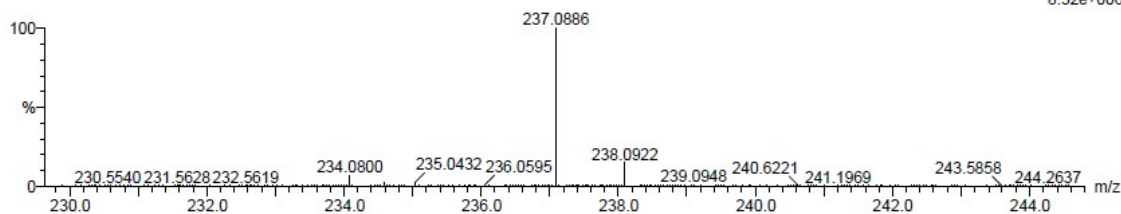

Minimum: -1.5

Maximum: 5.0 5.0 50.0

| Mass     | Calc. Mass | mDa  | PPM  | DBE | i-FIT  | Norm | Conf (%) | Formula       |
|----------|------------|------|------|-----|--------|------|----------|---------------|
| 237.0886 | 237.0891   | -0.5 | -2.1 | 7.5 | 1218.2 | n/a  | n/a      | C14 H14 O2 Na |



# Compound 11a

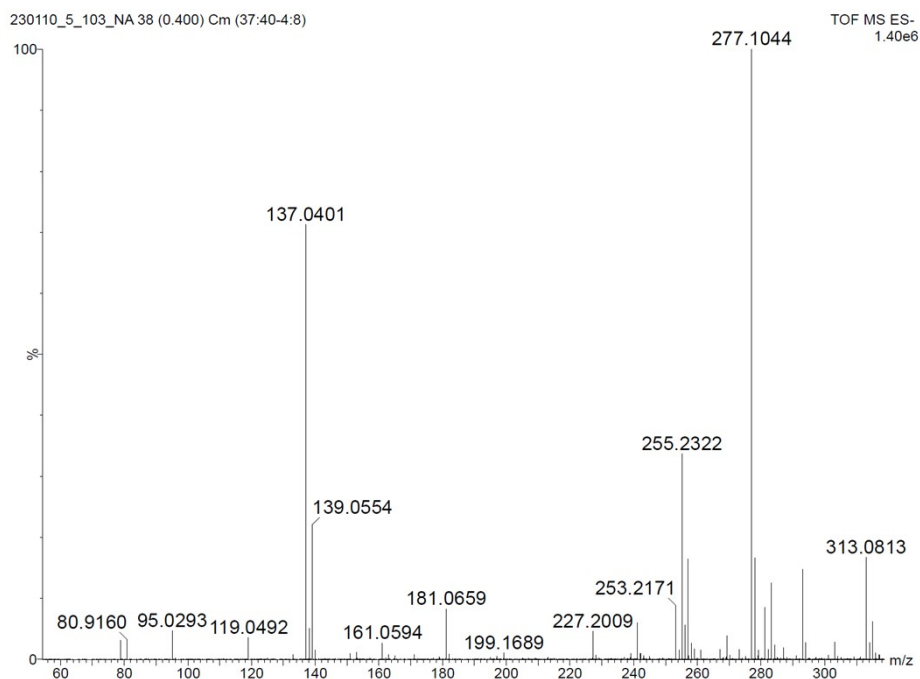

## Elemental Composition Report

Page 1

### Single Mass Analysis

Tolerance = 5.0 PPM / DBE: min = -1.5, max = 50.0

Element prediction: Off

Number of isotope peaks used for i-FIT = 9

Monoisotopic Mass, Even Electron Ions

131 formula(e) evaluated with 2 results within limits (all results (up to 1000) for each mass)

Elements Used:

C: 0-30 H: 0-25 O: 0-8 F: 0-6

230110\_5\_103\_NA 38 (0.400) Cm (37:40-4:8)

TOF MS ES- 1.40e+006

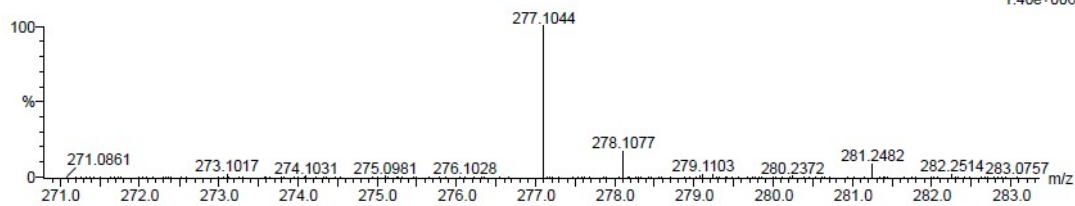

Minimum: -1.5  
Maximum: 5.0 5.0 50.0

| Mass     | Calc. Mass | mDa | PPM | DBE | i-FIT | Norm  | Conf (%) | Formula       |
|----------|------------|-----|-----|-----|-------|-------|----------|---------------|
| 277.1044 | 277.1040   | 0.4 | 1.4 | 8.5 | 777.3 | 0.563 | 56.95    | C16 H15 O2 F2 |



# Compound 12a

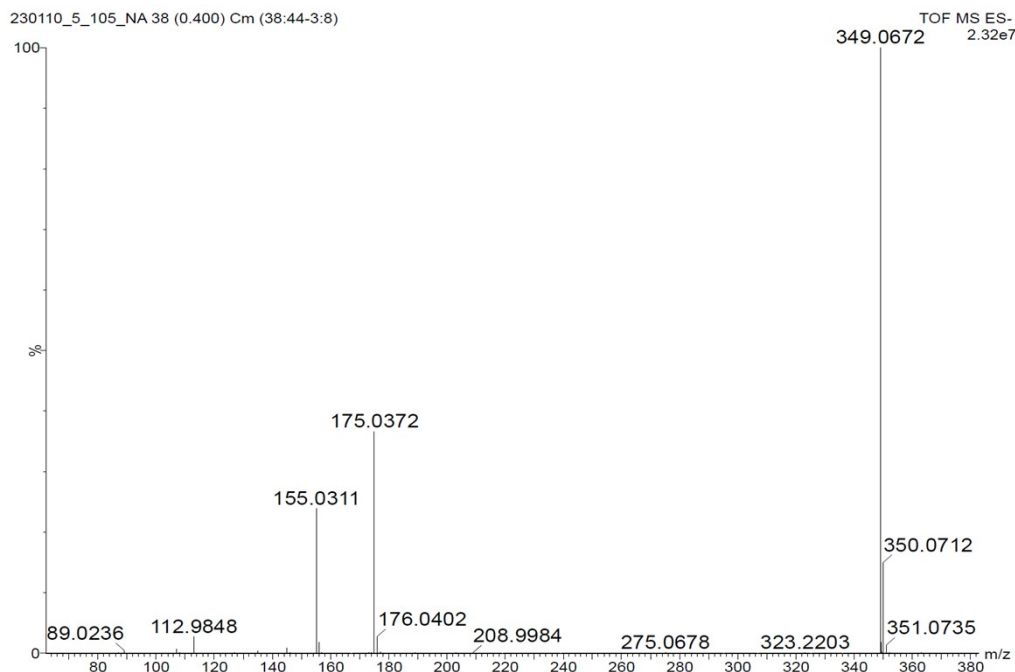

## Elemental Composition Report

Page 1

### Single Mass Analysis

Tolerance = 5.0 PPM / DBE: min = -1.5, max = 50.0

Element prediction: Off

Number of isotope peaks used for i-FIT = 9

Monoisotopic Mass, Even Electron Ions

140 formula(e) evaluated with 4 results within limits (all results (up to 1000) for each mass)

Elements Used:

C: 0-30 H: 0-25 O: 0-8 F: 0-6

230110\_5\_105\_NA 38 (0.400) Cm (38:44-3:8)

TOF MS ES-  
2.32e+007

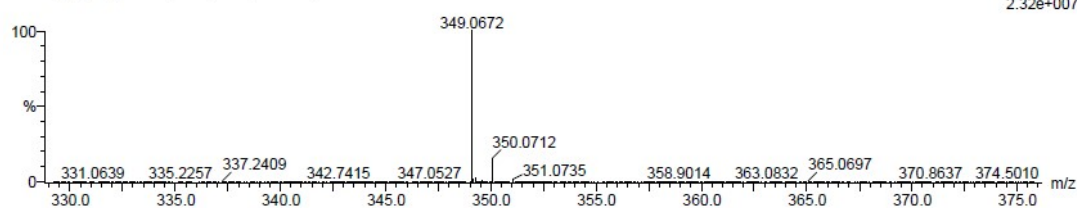

Minimum: -1.5  
Maximum: 5.0 5.0 50.0

| Mass     | Calc. Mass | mDa | PPM | DBE | i-FIT  | Norm  | Conf (%) | Formula       |
|----------|------------|-----|-----|-----|--------|-------|----------|---------------|
| 349.0672 | 349.0663   | 0.9 | 2.6 | 8.5 | 1865.1 | 0.000 | 99.95    | C16 H11 O2 F6 |
